# Supplementary material
Source: MDPI journal article supplement (https://www.mdpi.com/1996-1073/9/11/947)
Supplement: s1 [file s1]

## Sheet: Title Page
		Exergy Accounting: A Quantitative Comparison of Methods and Implications for Energy-Economy Analysis
		Jack Miller, Timothy J. Foxon and Steve Sorrell
		Supplementary Materials
	1	Sectors and sub-sector used in IEA Energy Balances
	2	Resource Content Method - renewable technology conversion efficiencies
	3	Allocation of energy carriers to intermediate steps and end use
	4	Non-electrical heat allocation
	5a	Allocation of electricity to end-use: map
	5b	Allocation of electricity to end-use: Sources and explanation
	5c	Allocation of electricity to end-use: Values
	6a	Full list of end-use exergy efficiencies in scenarios
	6b	Method of estimating HTH efficiency
	7	Useful Exergy outputs
	References	List of references

## Sheet: 1
	Supplementary Materials 1
	International Energy Agency Extended Energy Balances
	Full list of sectors and sub-sectors
	Highlighted constitutes final energy/exergy - rest are excluded
	Sector	Sub-sector
	Total primary energy supply	Production
		Imports
		Exports
		International marine bunkers
		International aviation bunkers
		Stock changes
		Transfers
		Statistical differences
	Transformation processes	Main activity producer electricity plants
		Autoproducer electricity plants
		Main activity producer CHP plants
		Autoproducer CHP plants
		Main activity producer heat plants
		Autoproducer heat plants
		Heat pumps
		Electric boilers
		Chemical heat for electricity production
		Blast furnaces (TBLASTFUR)
		Gas works (TGASWKS)
		Coke ovens (TCOKEOVS)
		Patent fuel plants (TPATFUEL)
		BKB/peat briquette plants (TBKB)
		Oil refineries (TREFINER)
		Petrochemical plants
		Coal liquefaction plants (TCOALLIQ)
		Gas-to-liquids (GTL) plants (TGTL)
		For blended natural gas
		Charcoal production plants (TCHARCOAL)
		Non-specified (transformation)
	Energy industry own use	Coal mines
		Oil and gas extraction
		Blast furnaces (EBLASTFUR)
		Gas works (EGASWKS)
		Gasification plants for biogases
		Coke ovens (ECOKEOVS)
		Patent fuel plants (EPATFUEL)
		BKB/peat briquette plants (EBKB)
		Oil refineries (EREFINER)
		Coal liquefaction plants (ECOALLIQ)
		Liquefaction (LNG) / regasification plants
		Gas-to-liquids (GTL) plants (EGTL)
		Own use in electricity, CHP and heat plants
		Pumped storage plants
		Nuclear industry
		Charcoal production plants (ECHARCOAL)
		Non-specified (energy)
		Losses
	Industry	Iron and steel
		Chemical and petrochemical
		Non-ferrous metals
		Non-metallic minerals
		Transport equipment
		Machinery
		Mining and quarrying
		Food and tobacco
		Paper, pulp and print
		Wood and wood products
		Construction
		Textile and leather
		Non-specified (industry)
	Transport	Domestic aviation
		Road
		Rail
		Pipeline transport
		Domestic navigation
		Non-specified (transport)
	Other	Residential
		Commercial and public services
		Agriculture/forestry
		Fishing
		Non-specified (other)
	Non-energy use	Non-energy use industry/transformation/energy
		Memo- Non-energy use chemical/petrochemical
		Non-energy use in transport
		Non-energy use in other
	Electricity output (GWh)	Electricity output (GWh)-main activity producer electricity plants
		Electricity output (GWh)-autoproducer electricity plants
		Electricity output (GWh)-main activity producer CHP plants
		Electricity output (GWh)-autoproducer CHP plants
	Heat output	Heat output-main activity producer CHP plants
		Heat output-autoproducer CHP plants
		Heat output-main activity producer heat plants
		Heat output-autoproducer heat plants

## Sheet: 2
	Supplementary Materials 2
	Primary-secondary efficiency of renewable electricity conversion technologies [12]
	Technology	Efficiency (%)
	Hydro	0.85
	Biomass	0.33
	Geothermak	0.1
	Solar PV	0.07
	Solar thermal	0.33
	Tidal/wave	0.07
	Wind	0.15
	Other	0.33

## Sheet: 3
	Supplementary Materials 3
	Full list of allocation of energy carrier/sub-sector pair. For heat and electricity, an additional step occurs subsequent to this (see pages 4 and 5)
	Sector	Sub-sector	Energy Carrier	Allocation
	Energy Industry Own Use (EIOU)	Coal mines	Hard coal (if no detail)	MT industrial heat
	Energy Industry Own Use (EIOU)	Coal mines	Brown coal (if no detail)	MT industrial heat
	Energy Industry Own Use (EIOU)	Coal mines	Anthracite	MT industrial heat
	Energy Industry Own Use (EIOU)	Coal mines	Coking coal	MT industrial heat
	Energy Industry Own Use (EIOU)	Coal mines	Other bituminous coal	MT industrial heat
	Energy Industry Own Use (EIOU)	Coal mines	Sub-bituminous coal	MT industrial heat
	Energy Industry Own Use (EIOU)	Coal mines	Lignite	MT industrial heat
	Energy Industry Own Use (EIOU)	Coal mines	Peat	MT industrial heat
	Energy Industry Own Use (EIOU)	Coal mines	Patent fuel	MT industrial heat
	Energy Industry Own Use (EIOU)	Coal mines	Coke oven coke	50% HT ind. heat, 50% MT ind. heat
	Energy Industry Own Use (EIOU)	Coal mines	Gas coke	50% HT ind. heat, 50% MT ind. heat
	Energy Industry Own Use (EIOU)	Coal mines	Coal tar	MT industrial heat
	Energy Industry Own Use (EIOU)	Coal mines	BKB	MT industrial heat
	Energy Industry Own Use (EIOU)	Coal mines	Gas works gas	50% HT ind. heat, 50% MT ind. heat
	Energy Industry Own Use (EIOU)	Coal mines	Coke oven gas	50% HT ind. heat, 50% MT ind. heat
	Energy Industry Own Use (EIOU)	Coal mines	Blast furnace gas	50% HT ind. heat, 50% MT ind. heat
	Energy Industry Own Use (EIOU)	Coal mines	Other recovered gases	50% HT ind. heat, 50% MT ind. heat
	Energy Industry Own Use (EIOU)	Coal mines	Elec/heat output from non-specified manufactured gases	MT industrial heat
	Energy Industry Own Use (EIOU)	Coal mines	Industrial waste	Water heat
	Energy Industry Own Use (EIOU)	Coal mines	Municipal waste (renewable)	Water heat
	Energy Industry Own Use (EIOU)	Coal mines	Municipal waste (non-renewable)	Water heat
	Energy Industry Own Use (EIOU)	Coal mines	Primary solid biofuels	Water heat
	Energy Industry Own Use (EIOU)	Coal mines	Biogases	Water heat
	Energy Industry Own Use (EIOU)	Coal mines	Biogasoline	Diesel industrial static
	Energy Industry Own Use (EIOU)	Coal mines	Biodiesels	Diesel industrial static
	Energy Industry Own Use (EIOU)	Coal mines	Other liquid biofuels	Diesel industrial static
	Energy Industry Own Use (EIOU)	Coal mines	Non-specified primary biofuels and waste	Water heat
	Energy Industry Own Use (EIOU)	Coal mines	Charcoal	Water heat
	Energy Industry Own Use (EIOU)	Coal mines	Natural gas	MT industrial heat
	Energy Industry Own Use (EIOU)	Coal mines	Crude/NGL/feedstocks (if no detail)	MT industrial heat
	Energy Industry Own Use (EIOU)	Coal mines	Crude oil	MT industrial heat
	Energy Industry Own Use (EIOU)	Coal mines	Natural gas liquids	MT industrial heat
	Energy Industry Own Use (EIOU)	Coal mines	Refinery feedstocks	MT industrial heat
	Energy Industry Own Use (EIOU)	Coal mines	Additives/blending components	MT industrial heat
	Energy Industry Own Use (EIOU)	Coal mines	Other hydrocarbons	MT industrial heat
	Energy Industry Own Use (EIOU)	Coal mines	Refinery gas	MT industrial heat
	Energy Industry Own Use (EIOU)	Coal mines	Ethane	Water heat
	Energy Industry Own Use (EIOU)	Coal mines	Liquefied petroleum gases (LPG)	Diesel industrial static
	Energy Industry Own Use (EIOU)	Coal mines	Motor gasoline excl. biofuels	Diesel industrial static
	Energy Industry Own Use (EIOU)	Coal mines	Aviation gasoline	Diesel industrial static
	Energy Industry Own Use (EIOU)	Coal mines	Gasoline type jet fuel	Diesel industrial static
	Energy Industry Own Use (EIOU)	Coal mines	Kerosene type jet fuel excl. biofuels	Diesel industrial static
	Energy Industry Own Use (EIOU)	Coal mines	Other kerosene	Water heat
	Energy Industry Own Use (EIOU)	Coal mines	Gas/diesel oil excl. biofuels	Diesel industrial static
	Energy Industry Own Use (EIOU)	Coal mines	Fuel oil	MT industrial heat
	Energy Industry Own Use (EIOU)	Coal mines	Naphtha	Diesel industrial static
	Energy Industry Own Use (EIOU)	Coal mines	White spirit & SBP	Diesel industrial static
	Energy Industry Own Use (EIOU)	Coal mines	Lubricants	Diesel industrial static
	Energy Industry Own Use (EIOU)	Coal mines	Bitumen	Diesel industrial static
	Energy Industry Own Use (EIOU)	Coal mines	Paraffin waxes	Water heat
	Energy Industry Own Use (EIOU)	Coal mines	Petroleum coke	MT industrial heat
	Energy Industry Own Use (EIOU)	Coal mines	Other oil products	MT industrial heat
	Energy Industry Own Use (EIOU)	Coal mines	Heat output from non-specified combustible fuels	Water heat
	Energy Industry Own Use (EIOU)	Coal mines	Nuclear	No allocation
	Energy Industry Own Use (EIOU)	Coal mines	Hydro	No allocation
	Energy Industry Own Use (EIOU)	Coal mines	Geothermal	Water heat
	Energy Industry Own Use (EIOU)	Coal mines	Solar photovoltaics	No allocation
	Energy Industry Own Use (EIOU)	Coal mines	Solar thermal	Space heat
	Energy Industry Own Use (EIOU)	Coal mines	Tide, wave and ocean	No allocation
	Energy Industry Own Use (EIOU)	Coal mines	Wind	No allocation
	Energy Industry Own Use (EIOU)	Coal mines	Other sources	Water heat
	Energy Industry Own Use (EIOU)	Coal mines	Electricity	Electricity: Industry
	Energy Industry Own Use (EIOU)	Coal mines	Heat	Water heat
	Energy Industry Own Use (EIOU)	Coal mines	Oil shale and oil sands	No allocation
	Energy Industry Own Use (EIOU)	Coal mines	Peat products	MT industrial heat
	Energy Industry Own Use (EIOU)	Coal mines
	EIOU	Oil and gas extraction	Hard coal (if no detail)	MT industrial heat
	EIOU	Oil and gas extraction	Brown coal (if no detail)	MT industrial heat
	EIOU	Oil and gas extraction	Anthracite	MT industrial heat
	EIOU	Oil and gas extraction	Coking coal	MT industrial heat
	EIOU	Oil and gas extraction	Other bituminous coal	MT industrial heat
	EIOU	Oil and gas extraction	Sub-bituminous coal	MT industrial heat
	EIOU	Oil and gas extraction	Lignite	MT industrial heat
	EIOU	Oil and gas extraction	Peat	MT industrial heat
	EIOU	Oil and gas extraction	Patent fuel	MT industrial heat
	EIOU	Oil and gas extraction	Coke oven coke	50% HT ind. heat, 50% MT ind. heat
	EIOU	Oil and gas extraction	Gas coke	50% HT ind. heat, 50% MT ind. heat
	EIOU	Oil and gas extraction	Coal tar	MT industrial heat
	EIOU	Oil and gas extraction	BKB	MT industrial heat
	EIOU	Oil and gas extraction	Gas works gas	50% HT ind. heat, 50% MT ind. heat
	EIOU	Oil and gas extraction	Coke oven gas	50% HT ind. heat, 50% MT ind. heat
	EIOU	Oil and gas extraction	Blast furnace gas	50% HT ind. heat, 50% MT ind. heat
	EIOU	Oil and gas extraction	Other recovered gases	50% HT ind. heat, 50% MT ind. heat
	EIOU	Oil and gas extraction	Elec/heat output from non-specified manufactured gases	MT industrial heat
	EIOU	Oil and gas extraction	Industrial waste	Water heat
	EIOU	Oil and gas extraction	Municipal waste (renewable)	Water heat
	EIOU	Oil and gas extraction	Municipal waste (non-renewable)	Water heat
	EIOU	Oil and gas extraction	Primary solid biofuels	Water heat
	EIOU	Oil and gas extraction	Biogases	Water heat
	EIOU	Oil and gas extraction	Biogasoline	Diesel industrial static
	EIOU	Oil and gas extraction	Biodiesels	Diesel industrial static
	EIOU	Oil and gas extraction	Other liquid biofuels	Diesel industrial static
	EIOU	Oil and gas extraction	Non-specified primary biofuels and waste	Water heat
	EIOU	Oil and gas extraction	Charcoal	Water heat
	EIOU	Oil and gas extraction	Natural gas	MT industrial heat
	EIOU	Oil and gas extraction	Crude/NGL/feedstocks (if no detail)	MT industrial heat
	EIOU	Oil and gas extraction	Crude oil	MT industrial heat
	EIOU	Oil and gas extraction	Natural gas liquids	MT industrial heat
	EIOU	Oil and gas extraction	Refinery feedstocks	MT industrial heat
	EIOU	Oil and gas extraction	Additives/blending components	MT industrial heat
	EIOU	Oil and gas extraction	Other hydrocarbons	MT industrial heat
	EIOU	Oil and gas extraction	Refinery gas	MT industrial heat
	EIOU	Oil and gas extraction	Ethane	Water heat
	EIOU	Oil and gas extraction	Liquefied petroleum gases (LPG)	Diesel industrial static
	EIOU	Oil and gas extraction	Motor gasoline excl. biofuels	Diesel industrial static
	EIOU	Oil and gas extraction	Aviation gasoline	Diesel industrial static
	EIOU	Oil and gas extraction	Gasoline type jet fuel	Diesel industrial static
	EIOU	Oil and gas extraction	Kerosene type jet fuel excl. biofuels	Diesel industrial static
	EIOU	Oil and gas extraction	Other kerosene	Water heat
	EIOU	Oil and gas extraction	Gas/diesel oil excl. biofuels	Diesel industrial static
	EIOU	Oil and gas extraction	Fuel oil	MT industrial heat
	EIOU	Oil and gas extraction	Naphtha	Diesel industrial static
	EIOU	Oil and gas extraction	White spirit & SBP	Diesel industrial static
	EIOU	Oil and gas extraction	Lubricants	Diesel industrial static
	EIOU	Oil and gas extraction	Bitumen	Diesel industrial static
	EIOU	Oil and gas extraction	Paraffin waxes	Water heat
	EIOU	Oil and gas extraction	Petroleum coke	MT industrial heat
	EIOU	Oil and gas extraction	Other oil products	MT industrial heat
	EIOU	Oil and gas extraction	Heat output from non-specified combustible fuels	Water heat
	EIOU	Oil and gas extraction	Nuclear	No allocation
	EIOU	Oil and gas extraction	Hydro	No allocation
	EIOU	Oil and gas extraction	Geothermal	Water heat
	EIOU	Oil and gas extraction	Solar photovoltaics	No allocation
	EIOU	Oil and gas extraction	Solar thermal	Space heat
	EIOU	Oil and gas extraction	Tide, wave and ocean	No allocation
	EIOU	Oil and gas extraction	Wind	No allocation
	EIOU	Oil and gas extraction	Other sources	Water heat
	EIOU	Oil and gas extraction	Electricity	Electricity: Industry
	EIOU	Oil and gas extraction	Heat	Water heat
	EIOU	Oil and gas extraction	Oil shale and oil sands	No allocation
	EIOU	Oil and gas extraction	Peat products	MT industrial heat
	EIOU	Oil and gas extraction
	EIOU	Blast furnaces (EBLASTFUR)	Hard coal (if no detail)	50% HT ind. heat, 50% MT ind. heat
	EIOU	Blast furnaces (EBLASTFUR)	Brown coal (if no detail)	50% HT ind. heat, 50% MT ind. heat
	EIOU	Blast furnaces (EBLASTFUR)	Anthracite	50% HT ind. heat, 50% MT ind. heat
	EIOU	Blast furnaces (EBLASTFUR)	Coking coal	50% HT ind. heat, 50% MT ind. heat
	EIOU	Blast furnaces (EBLASTFUR)	Other bituminous coal	50% HT ind. heat, 50% MT ind. heat
	EIOU	Blast furnaces (EBLASTFUR)	Sub-bituminous coal	50% HT ind. heat, 50% MT ind. heat
	EIOU	Blast furnaces (EBLASTFUR)	Lignite	50% HT ind. heat, 50% MT ind. heat
	EIOU	Blast furnaces (EBLASTFUR)	Peat	50% HT ind. heat, 50% MT ind. heat
	EIOU	Blast furnaces (EBLASTFUR)	Patent fuel	50% HT ind. heat, 50% MT ind. heat
	EIOU	Blast furnaces (EBLASTFUR)	Coke oven coke	HTH industrial heat
	EIOU	Blast furnaces (EBLASTFUR)	Gas coke	HTH industrial heat
	EIOU	Blast furnaces (EBLASTFUR)	Coal tar	50% HT ind. heat, 50% MT ind. heat
	EIOU	Blast furnaces (EBLASTFUR)	BKB	50% HT ind. heat, 50% MT ind. heat
	EIOU	Blast furnaces (EBLASTFUR)	Gas works gas	HTH industrial heat
	EIOU	Blast furnaces (EBLASTFUR)	Coke oven gas	HTH industrial heat
	EIOU	Blast furnaces (EBLASTFUR)	Blast furnace gas	HTH industrial heat
	EIOU	Blast furnaces (EBLASTFUR)	Other recovered gases	HTH industrial heat
	EIOU	Blast furnaces (EBLASTFUR)	Elec/heat output from non-specified manufactured gases	MT industrial heat
	EIOU	Blast furnaces (EBLASTFUR)	Industrial waste	MT industrial heat
	EIOU	Blast furnaces (EBLASTFUR)	Municipal waste (renewable)	MT industrial heat
	EIOU	Blast furnaces (EBLASTFUR)	Municipal waste (non-renewable)	MT industrial heat
	EIOU	Blast furnaces (EBLASTFUR)	Primary solid biofuels	MT industrial heat
	EIOU	Blast furnaces (EBLASTFUR)	Biogases	MT industrial heat
	EIOU	Blast furnaces (EBLASTFUR)	Biogasoline	Diesel industrial static
	EIOU	Blast furnaces (EBLASTFUR)	Biodiesels	Diesel industrial static
	EIOU	Blast furnaces (EBLASTFUR)	Other liquid biofuels	Diesel industrial static
	EIOU	Blast furnaces (EBLASTFUR)	Non-specified primary biofuels and waste	MT industrial heat
	EIOU	Blast furnaces (EBLASTFUR)	Charcoal	Water heat
	EIOU	Blast furnaces (EBLASTFUR)	Natural gas	50% HT ind. heat, 50% MT ind. heat
	EIOU	Blast furnaces (EBLASTFUR)	Crude/NGL/feedstocks (if no detail)	MT industrial heat
	EIOU	Blast furnaces (EBLASTFUR)	Crude oil	MT industrial heat
	EIOU	Blast furnaces (EBLASTFUR)	Natural gas liquids	MT industrial heat
	EIOU	Blast furnaces (EBLASTFUR)	Refinery feedstocks	MT industrial heat
	EIOU	Blast furnaces (EBLASTFUR)	Additives/blending components	MT industrial heat
	EIOU	Blast furnaces (EBLASTFUR)	Other hydrocarbons	MT industrial heat
	EIOU	Blast furnaces (EBLASTFUR)	Refinery gas	Water heat
	EIOU	Blast furnaces (EBLASTFUR)	Ethane	Water heat
	EIOU	Blast furnaces (EBLASTFUR)	Liquefied petroleum gases (LPG)	Diesel industrial static
	EIOU	Blast furnaces (EBLASTFUR)	Motor gasoline excl. biofuels	Diesel industrial static
	EIOU	Blast furnaces (EBLASTFUR)	Aviation gasoline	Diesel industrial static
	EIOU	Blast furnaces (EBLASTFUR)	Gasoline type jet fuel	Diesel industrial static
	EIOU	Blast furnaces (EBLASTFUR)	Kerosene type jet fuel excl. biofuels	Diesel industrial static
	EIOU	Blast furnaces (EBLASTFUR)	Other kerosene	Water heat
	EIOU	Blast furnaces (EBLASTFUR)	Gas/diesel oil excl. biofuels	Diesel industrial static
	EIOU	Blast furnaces (EBLASTFUR)	Fuel oil	MT industrial heat
	EIOU	Blast furnaces (EBLASTFUR)	Naphtha	Diesel industrial static
	EIOU	Blast furnaces (EBLASTFUR)	White spirit & SBP	Diesel industrial static
	EIOU	Blast furnaces (EBLASTFUR)	Lubricants	Diesel industrial static
	EIOU	Blast furnaces (EBLASTFUR)	Bitumen	Diesel industrial static
	EIOU	Blast furnaces (EBLASTFUR)	Paraffin waxes	Water heat
	EIOU	Blast furnaces (EBLASTFUR)	Petroleum coke	MT industrial heat
	EIOU	Blast furnaces (EBLASTFUR)	Other oil products	MT industrial heat
	EIOU	Blast furnaces (EBLASTFUR)	Heat output from non-specified combustible fuels	Water heat
	EIOU	Blast furnaces (EBLASTFUR)	Nuclear	No allocation
	EIOU	Blast furnaces (EBLASTFUR)	Hydro	No allocation
	EIOU	Blast furnaces (EBLASTFUR)	Geothermal	Water heat
	EIOU	Blast furnaces (EBLASTFUR)	Solar photovoltaics	No allocation
	EIOU	Blast furnaces (EBLASTFUR)	Solar thermal	Space heat
	EIOU	Blast furnaces (EBLASTFUR)	Tide, wave and ocean	No allocation
	EIOU	Blast furnaces (EBLASTFUR)	Wind	No allocation
	EIOU	Blast furnaces (EBLASTFUR)	Other sources	Water heat
	EIOU	Blast furnaces (EBLASTFUR)	Electricity	Electricity: Industry
	EIOU	Blast furnaces (EBLASTFUR)	Heat	Water heat
	EIOU	Blast furnaces (EBLASTFUR)	Oil shale and oil sands	No allocation
	EIOU	Blast furnaces (EBLASTFUR)	Peat products	MT industrial heat
	EIOU	Blast furnaces (EBLASTFUR)
	EIOU	Gas works (EGASWKS)	Hard coal (if no detail)	50% HT ind. heat, 50% MT ind. heat
	EIOU	Gas works (EGASWKS)	Brown coal (if no detail)	50% HT ind. heat, 50% MT ind. heat
	EIOU	Gas works (EGASWKS)	Anthracite	50% HT ind. heat, 50% MT ind. heat
	EIOU	Gas works (EGASWKS)	Coking coal	50% HT ind. heat, 50% MT ind. heat
	EIOU	Gas works (EGASWKS)	Other bituminous coal	50% HT ind. heat, 50% MT ind. heat
	EIOU	Gas works (EGASWKS)	Sub-bituminous coal	50% HT ind. heat, 50% MT ind. heat
	EIOU	Gas works (EGASWKS)	Lignite	50% HT ind. heat, 50% MT ind. heat
	EIOU	Gas works (EGASWKS)	Peat	50% HT ind. heat, 50% MT ind. heat
	EIOU	Gas works (EGASWKS)	Patent fuel	50% HT ind. heat, 50% MT ind. heat
	EIOU	Gas works (EGASWKS)	Coke oven coke	HTH industrial heat
	EIOU	Gas works (EGASWKS)	Gas coke	HTH industrial heat
	EIOU	Gas works (EGASWKS)	Coal tar	50% HT ind. heat, 50% MT ind. heat
	EIOU	Gas works (EGASWKS)	BKB	50% HT ind. heat, 50% MT ind. heat
	EIOU	Gas works (EGASWKS)	Gas works gas	HTH industrial heat
	EIOU	Gas works (EGASWKS)	Coke oven gas	HTH industrial heat
	EIOU	Gas works (EGASWKS)	Blast furnace gas	HTH industrial heat
	EIOU	Gas works (EGASWKS)	Other recovered gases	HTH industrial heat
	EIOU	Gas works (EGASWKS)	Elec/heat output from non-specified manufactured gases	MT industrial heat
	EIOU	Gas works (EGASWKS)	Industrial waste	MT industrial heat
	EIOU	Gas works (EGASWKS)	Municipal waste (renewable)	MT industrial heat
	EIOU	Gas works (EGASWKS)	Municipal waste (non-renewable)	MT industrial heat
	EIOU	Gas works (EGASWKS)	Primary solid biofuels	MT industrial heat
	EIOU	Gas works (EGASWKS)	Biogases	MT industrial heat
	EIOU	Gas works (EGASWKS)	Biogasoline	Diesel industrial static
	EIOU	Gas works (EGASWKS)	Biodiesels	Diesel industrial static
	EIOU	Gas works (EGASWKS)	Other liquid biofuels	Diesel industrial static
	EIOU	Gas works (EGASWKS)	Non-specified primary biofuels and waste	MT industrial heat
	EIOU	Gas works (EGASWKS)	Charcoal	Water heat
	EIOU	Gas works (EGASWKS)	Natural gas	50% HT ind. heat, 50% MT ind. heat
	EIOU	Gas works (EGASWKS)	Crude/NGL/feedstocks (if no detail)	MT industrial heat
	EIOU	Gas works (EGASWKS)	Crude oil	MT industrial heat
	EIOU	Gas works (EGASWKS)	Natural gas liquids	MT industrial heat
	EIOU	Gas works (EGASWKS)	Refinery feedstocks	MT industrial heat
	EIOU	Gas works (EGASWKS)	Additives/blending components	MT industrial heat
	EIOU	Gas works (EGASWKS)	Other hydrocarbons	MT industrial heat
	EIOU	Gas works (EGASWKS)	Refinery gas	MT industrial heat
	EIOU	Gas works (EGASWKS)	Ethane	Water heat
	EIOU	Gas works (EGASWKS)	Liquefied petroleum gases (LPG)	Diesel industrial static
	EIOU	Gas works (EGASWKS)	Motor gasoline excl. biofuels	Diesel industrial static
	EIOU	Gas works (EGASWKS)	Aviation gasoline	Diesel industrial static
	EIOU	Gas works (EGASWKS)	Gasoline type jet fuel	Diesel industrial static
	EIOU	Gas works (EGASWKS)	Kerosene type jet fuel excl. biofuels	Diesel industrial static
	EIOU	Gas works (EGASWKS)	Other kerosene	Water heat
	EIOU	Gas works (EGASWKS)	Gas/diesel oil excl. biofuels	Diesel industrial static
	EIOU	Gas works (EGASWKS)	Fuel oil	MT industrial heat
	EIOU	Gas works (EGASWKS)	Naphtha	Diesel industrial static
	EIOU	Gas works (EGASWKS)	White spirit & SBP	Diesel industrial static
	EIOU	Gas works (EGASWKS)	Lubricants	Diesel industrial static
	EIOU	Gas works (EGASWKS)	Bitumen	Diesel industrial static
	EIOU	Gas works (EGASWKS)	Paraffin waxes	Water heat
	EIOU	Gas works (EGASWKS)	Petroleum coke	MT industrial heat
	EIOU	Gas works (EGASWKS)	Other oil products	MT industrial heat
	EIOU	Gas works (EGASWKS)	Heat output from non-specified combustible fuels	Water heat
	EIOU	Gas works (EGASWKS)	Nuclear	No allocation
	EIOU	Gas works (EGASWKS)	Hydro	No allocation
	EIOU	Gas works (EGASWKS)	Geothermal	Water heat
	EIOU	Gas works (EGASWKS)	Solar photovoltaics	No allocation
	EIOU	Gas works (EGASWKS)	Solar thermal	Space heat
	EIOU	Gas works (EGASWKS)	Tide, wave and ocean	No allocation
	EIOU	Gas works (EGASWKS)	Wind	No allocation
	EIOU	Gas works (EGASWKS)	Other sources	Water heat
	EIOU	Gas works (EGASWKS)	Electricity	Electricity: Industry
	EIOU	Gas works (EGASWKS)	Heat	Water heat
	EIOU	Gas works (EGASWKS)	Oil shale and oil sands	No allocation
	EIOU	Gas works (EGASWKS)	Peat products	MT industrial heat
	EIOU	Gas works (EGASWKS)
	EIOU	Gasification plants for biogases	Hard coal (if no detail)	50% HT ind. heat, 50% MT ind. heat
	EIOU	Gasification plants for biogases	Brown coal (if no detail)	50% HT ind. heat, 50% MT ind. heat
	EIOU	Gasification plants for biogases	Anthracite	50% HT ind. heat, 50% MT ind. heat
	EIOU	Gasification plants for biogases	Coking coal	50% HT ind. heat, 50% MT ind. heat
	EIOU	Gasification plants for biogases	Other bituminous coal	50% HT ind. heat, 50% MT ind. heat
	EIOU	Gasification plants for biogases	Sub-bituminous coal	50% HT ind. heat, 50% MT ind. heat
	EIOU	Gasification plants for biogases	Lignite	50% HT ind. heat, 50% MT ind. heat
	EIOU	Gasification plants for biogases	Peat	50% HT ind. heat, 50% MT ind. heat
	EIOU	Gasification plants for biogases	Patent fuel	50% HT ind. heat, 50% MT ind. heat
	EIOU	Gasification plants for biogases	Coke oven coke	HTH industrial heat
	EIOU	Gasification plants for biogases	Gas coke	HTH industrial heat
	EIOU	Gasification plants for biogases	Coal tar	50% HT ind. heat, 50% MT ind. heat
	EIOU	Gasification plants for biogases	BKB	50% HT ind. heat, 50% MT ind. heat
	EIOU	Gasification plants for biogases	Gas works gas	HTH industrial heat
	EIOU	Gasification plants for biogases	Coke oven gas	HTH industrial heat
	EIOU	Gasification plants for biogases	Blast furnace gas	HTH industrial heat
	EIOU	Gasification plants for biogases	Other recovered gases	HTH industrial heat
	EIOU	Gasification plants for biogases	Elec/heat output from non-specified manufactured gases	MT industrial heat
	EIOU	Gasification plants for biogases	Industrial waste	MT industrial heat
	EIOU	Gasification plants for biogases	Municipal waste (renewable)	MT industrial heat
	EIOU	Gasification plants for biogases	Municipal waste (non-renewable)	MT industrial heat
	EIOU	Gasification plants for biogases	Primary solid biofuels	MT industrial heat
	EIOU	Gasification plants for biogases	Biogases	MT industrial heat
	EIOU	Gasification plants for biogases	Biogasoline	Diesel industrial static
	EIOU	Gasification plants for biogases	Biodiesels	Diesel industrial static
	EIOU	Gasification plants for biogases	Other liquid biofuels	Diesel industrial static
	EIOU	Gasification plants for biogases	Non-specified primary biofuels and waste	MT industrial heat
	EIOU	Gasification plants for biogases	Charcoal	Water heat
	EIOU	Gasification plants for biogases	Natural gas	50% HT ind. heat, 50% MT ind. heat
	EIOU	Gasification plants for biogases	Crude/NGL/feedstocks (if no detail)	MT industrial heat
	EIOU	Gasification plants for biogases	Crude oil	MT industrial heat
	EIOU	Gasification plants for biogases	Natural gas liquids	MT industrial heat
	EIOU	Gasification plants for biogases	Refinery feedstocks	MT industrial heat
	EIOU	Gasification plants for biogases	Additives/blending components	MT industrial heat
	EIOU	Gasification plants for biogases	Other hydrocarbons	MT industrial heat
	EIOU	Gasification plants for biogases	Refinery gas	MT industrial heat
	EIOU	Gasification plants for biogases	Ethane	Water heat
	EIOU	Gasification plants for biogases	Liquefied petroleum gases (LPG)	Diesel industrial static
	EIOU	Gasification plants for biogases	Motor gasoline excl. biofuels	Diesel industrial static
	EIOU	Gasification plants for biogases	Aviation gasoline	Diesel industrial static
	EIOU	Gasification plants for biogases	Gasoline type jet fuel	Diesel industrial static
	EIOU	Gasification plants for biogases	Kerosene type jet fuel excl. biofuels	Diesel industrial static
	EIOU	Gasification plants for biogases	Other kerosene	Water heat
	EIOU	Gasification plants for biogases	Gas/diesel oil excl. biofuels	Diesel industrial static
	EIOU	Gasification plants for biogases	Fuel oil	MT industrial heat
	EIOU	Gasification plants for biogases	Naphtha	Diesel industrial static
	EIOU	Gasification plants for biogases	White spirit & SBP	Diesel industrial static
	EIOU	Gasification plants for biogases	Lubricants	Diesel industrial static
	EIOU	Gasification plants for biogases	Bitumen	Diesel industrial static
	EIOU	Gasification plants for biogases	Paraffin waxes	Water heat
	EIOU	Gasification plants for biogases	Petroleum coke	MT industrial heat
	EIOU	Gasification plants for biogases	Other oil products	MT industrial heat
	EIOU	Gasification plants for biogases	Heat output from non-specified combustible fuels	Water heat
	EIOU	Gasification plants for biogases	Nuclear	No allocation
	EIOU	Gasification plants for biogases	Hydro	No allocation
	EIOU	Gasification plants for biogases	Geothermal	Water heat
	EIOU	Gasification plants for biogases	Solar photovoltaics	No allocation
	EIOU	Gasification plants for biogases	Solar thermal	Space heat
	EIOU	Gasification plants for biogases	Tide, wave and ocean	No allocation
	EIOU	Gasification plants for biogases	Wind	No allocation
	EIOU	Gasification plants for biogases	Other sources	Water heat
	EIOU	Gasification plants for biogases	Electricity	Electricity: Industry
	EIOU	Gasification plants for biogases	Heat	Water heat
	EIOU	Gasification plants for biogases	Oil shale and oil sands	No allocation
	EIOU	Gasification plants for biogases	Peat products	MT industrial heat
	EIOU	Gasification plants for biogases
	EIOU	Coke ovens (ECOKEOVS)	Hard coal (if no detail)	50% HT ind. heat, 50% MT ind. heat
	EIOU	Coke ovens (ECOKEOVS)	Brown coal (if no detail)	50% HT ind. heat, 50% MT ind. heat
	EIOU	Coke ovens (ECOKEOVS)	Anthracite	50% HT ind. heat, 50% MT ind. heat
	EIOU	Coke ovens (ECOKEOVS)	Coking coal	50% HT ind. heat, 50% MT ind. heat
	EIOU	Coke ovens (ECOKEOVS)	Other bituminous coal	50% HT ind. heat, 50% MT ind. heat
	EIOU	Coke ovens (ECOKEOVS)	Sub-bituminous coal	50% HT ind. heat, 50% MT ind. heat
	EIOU	Coke ovens (ECOKEOVS)	Lignite	50% HT ind. heat, 50% MT ind. heat
	EIOU	Coke ovens (ECOKEOVS)	Peat	50% HT ind. heat, 50% MT ind. heat
	EIOU	Coke ovens (ECOKEOVS)	Patent fuel	50% HT ind. heat, 50% MT ind. heat
	EIOU	Coke ovens (ECOKEOVS)	Coke oven coke	HTH industrial heat
	EIOU	Coke ovens (ECOKEOVS)	Gas coke	HTH industrial heat
	EIOU	Coke ovens (ECOKEOVS)	Coal tar	50% HT ind. heat, 50% MT ind. heat
	EIOU	Coke ovens (ECOKEOVS)	BKB	50% HT ind. heat, 50% MT ind. heat
	EIOU	Coke ovens (ECOKEOVS)	Gas works gas	HTH industrial heat
	EIOU	Coke ovens (ECOKEOVS)	Coke oven gas	HTH industrial heat
	EIOU	Coke ovens (ECOKEOVS)	Blast furnace gas	HTH industrial heat
	EIOU	Coke ovens (ECOKEOVS)	Other recovered gases	HTH industrial heat
	EIOU	Coke ovens (ECOKEOVS)	Elec/heat output from non-specified manufactured gases	MT industrial heat
	EIOU	Coke ovens (ECOKEOVS)	Industrial waste	MT industrial heat
	EIOU	Coke ovens (ECOKEOVS)	Municipal waste (renewable)	MT industrial heat
	EIOU	Coke ovens (ECOKEOVS)	Municipal waste (non-renewable)	MT industrial heat
	EIOU	Coke ovens (ECOKEOVS)	Primary solid biofuels	MT industrial heat
	EIOU	Coke ovens (ECOKEOVS)	Biogases	MT industrial heat
	EIOU	Coke ovens (ECOKEOVS)	Biogasoline	Diesel industrial static
	EIOU	Coke ovens (ECOKEOVS)	Biodiesels	Diesel industrial static
	EIOU	Coke ovens (ECOKEOVS)	Other liquid biofuels	Diesel industrial static
	EIOU	Coke ovens (ECOKEOVS)	Non-specified primary biofuels and waste	MT industrial heat
	EIOU	Coke ovens (ECOKEOVS)	Charcoal	Water heat
	EIOU	Coke ovens (ECOKEOVS)	Natural gas	HTH industrial heat
	EIOU	Coke ovens (ECOKEOVS)	Crude/NGL/feedstocks (if no detail)	MT industrial heat
	EIOU	Coke ovens (ECOKEOVS)	Crude oil	MT industrial heat
	EIOU	Coke ovens (ECOKEOVS)	Natural gas liquids	MT industrial heat
	EIOU	Coke ovens (ECOKEOVS)	Refinery feedstocks	MT industrial heat
	EIOU	Coke ovens (ECOKEOVS)	Additives/blending components	MT industrial heat
	EIOU	Coke ovens (ECOKEOVS)	Other hydrocarbons	MT industrial heat
	EIOU	Coke ovens (ECOKEOVS)	Refinery gas	MT industrial heat
	EIOU	Coke ovens (ECOKEOVS)	Ethane	Water heat
	EIOU	Coke ovens (ECOKEOVS)	Liquefied petroleum gases (LPG)	Diesel industrial static
	EIOU	Coke ovens (ECOKEOVS)	Motor gasoline excl. biofuels	Diesel industrial static
	EIOU	Coke ovens (ECOKEOVS)	Aviation gasoline	Diesel industrial static
	EIOU	Coke ovens (ECOKEOVS)	Gasoline type jet fuel	Diesel industrial static
	EIOU	Coke ovens (ECOKEOVS)	Kerosene type jet fuel excl. biofuels	Diesel industrial static
	EIOU	Coke ovens (ECOKEOVS)	Other kerosene	Water heat
	EIOU	Coke ovens (ECOKEOVS)	Gas/diesel oil excl. biofuels	Diesel industrial static
	EIOU	Coke ovens (ECOKEOVS)	Fuel oil	MT industrial heat
	EIOU	Coke ovens (ECOKEOVS)	Naphtha	Diesel industrial static
	EIOU	Coke ovens (ECOKEOVS)	White spirit & SBP	Diesel industrial static
	EIOU	Coke ovens (ECOKEOVS)	Lubricants	Diesel industrial static
	EIOU	Coke ovens (ECOKEOVS)	Bitumen	Diesel industrial static
	EIOU	Coke ovens (ECOKEOVS)	Paraffin waxes	Water heat
	EIOU	Coke ovens (ECOKEOVS)	Petroleum coke	MT industrial heat
	EIOU	Coke ovens (ECOKEOVS)	Other oil products	MT industrial heat
	EIOU	Coke ovens (ECOKEOVS)	Heat output from non-specified combustible fuels	Water heat
	EIOU	Coke ovens (ECOKEOVS)	Nuclear	No allocation
	EIOU	Coke ovens (ECOKEOVS)	Hydro	No allocation
	EIOU	Coke ovens (ECOKEOVS)	Geothermal	Water heat
	EIOU	Coke ovens (ECOKEOVS)	Solar photovoltaics	No allocation
	EIOU	Coke ovens (ECOKEOVS)	Solar thermal	Space heat
	EIOU	Coke ovens (ECOKEOVS)	Tide, wave and ocean	No allocation
	EIOU	Coke ovens (ECOKEOVS)	Wind	No allocation
	EIOU	Coke ovens (ECOKEOVS)	Other sources	Water heat
	EIOU	Coke ovens (ECOKEOVS)	Electricity	Electricity: Industry
	EIOU	Coke ovens (ECOKEOVS)	Heat	Water heat
	EIOU	Coke ovens (ECOKEOVS)	Oil shale and oil sands	No allocation
	EIOU	Coke ovens (ECOKEOVS)	Peat products	MT industrial heat
	EIOU	Coke ovens (ECOKEOVS)
	EIOU	Patent fuel plants (EPATFUEL)	Hard coal (if no detail)	MT industrial heat
	EIOU	Patent fuel plants (EPATFUEL)	Brown coal (if no detail)	MT industrial heat
	EIOU	Patent fuel plants (EPATFUEL)	Anthracite	MT industrial heat
	EIOU	Patent fuel plants (EPATFUEL)	Coking coal	MT industrial heat
	EIOU	Patent fuel plants (EPATFUEL)	Other bituminous coal	MT industrial heat
	EIOU	Patent fuel plants (EPATFUEL)	Sub-bituminous coal	MT industrial heat
	EIOU	Patent fuel plants (EPATFUEL)	Lignite	MT industrial heat
	EIOU	Patent fuel plants (EPATFUEL)	Peat	MT industrial heat
	EIOU	Patent fuel plants (EPATFUEL)	Patent fuel	MT industrial heat
	EIOU	Patent fuel plants (EPATFUEL)	Coke oven coke	HTH industrial heat
	EIOU	Patent fuel plants (EPATFUEL)	Gas coke	HTH industrial heat
	EIOU	Patent fuel plants (EPATFUEL)	Coal tar	MT industrial heat
	EIOU	Patent fuel plants (EPATFUEL)	BKB	MT industrial heat
	EIOU	Patent fuel plants (EPATFUEL)	Gas works gas	HTH industrial heat
	EIOU	Patent fuel plants (EPATFUEL)	Coke oven gas	HTH industrial heat
	EIOU	Patent fuel plants (EPATFUEL)	Blast furnace gas	HTH industrial heat
	EIOU	Patent fuel plants (EPATFUEL)	Other recovered gases	HTH industrial heat
	EIOU	Patent fuel plants (EPATFUEL)	Elec/heat output from non-specified manufactured gases	MT industrial heat
	EIOU	Patent fuel plants (EPATFUEL)	Industrial waste	MT industrial heat
	EIOU	Patent fuel plants (EPATFUEL)	Municipal waste (renewable)	MT industrial heat
	EIOU	Patent fuel plants (EPATFUEL)	Municipal waste (non-renewable)	MT industrial heat
	EIOU	Patent fuel plants (EPATFUEL)	Primary solid biofuels	MT industrial heat
	EIOU	Patent fuel plants (EPATFUEL)	Biogases	MT industrial heat
	EIOU	Patent fuel plants (EPATFUEL)	Biogasoline	Diesel industrial static
	EIOU	Patent fuel plants (EPATFUEL)	Biodiesels	Diesel industrial static
	EIOU	Patent fuel plants (EPATFUEL)	Other liquid biofuels	Diesel industrial static
	EIOU	Patent fuel plants (EPATFUEL)	Non-specified primary biofuels and waste	MT industrial heat
	EIOU	Patent fuel plants (EPATFUEL)	Charcoal	Water heat
	EIOU	Patent fuel plants (EPATFUEL)	Natural gas	MT industrial heat
	EIOU	Patent fuel plants (EPATFUEL)	Crude/NGL/feedstocks (if no detail)	MT industrial heat
	EIOU	Patent fuel plants (EPATFUEL)	Crude oil	MT industrial heat
	EIOU	Patent fuel plants (EPATFUEL)	Natural gas liquids	MT industrial heat
	EIOU	Patent fuel plants (EPATFUEL)	Refinery feedstocks	MT industrial heat
	EIOU	Patent fuel plants (EPATFUEL)	Additives/blending components	MT industrial heat
	EIOU	Patent fuel plants (EPATFUEL)	Other hydrocarbons	MT industrial heat
	EIOU	Patent fuel plants (EPATFUEL)	Refinery gas	MT industrial heat
	EIOU	Patent fuel plants (EPATFUEL)	Ethane	Water heat
	EIOU	Patent fuel plants (EPATFUEL)	Liquefied petroleum gases (LPG)	Diesel industrial static
	EIOU	Patent fuel plants (EPATFUEL)	Motor gasoline excl. biofuels	Diesel industrial static
	EIOU	Patent fuel plants (EPATFUEL)	Aviation gasoline	Diesel industrial static
	EIOU	Patent fuel plants (EPATFUEL)	Gasoline type jet fuel	Diesel industrial static
	EIOU	Patent fuel plants (EPATFUEL)	Kerosene type jet fuel excl. biofuels	Diesel industrial static
	EIOU	Patent fuel plants (EPATFUEL)	Other kerosene	Water heat
	EIOU	Patent fuel plants (EPATFUEL)	Gas/diesel oil excl. biofuels	Diesel industrial static
	EIOU	Patent fuel plants (EPATFUEL)	Fuel oil	MT industrial heat
	EIOU	Patent fuel plants (EPATFUEL)	Naphtha	Diesel industrial static
	EIOU	Patent fuel plants (EPATFUEL)	White spirit & SBP	Diesel industrial static
	EIOU	Patent fuel plants (EPATFUEL)	Lubricants	Diesel industrial static
	EIOU	Patent fuel plants (EPATFUEL)	Bitumen	Diesel industrial static
	EIOU	Patent fuel plants (EPATFUEL)	Paraffin waxes	Water heat
	EIOU	Patent fuel plants (EPATFUEL)	Petroleum coke	MT industrial heat
	EIOU	Patent fuel plants (EPATFUEL)	Other oil products	MT industrial heat
	EIOU	Patent fuel plants (EPATFUEL)	Heat output from non-specified combustible fuels	Water heat
	EIOU	Patent fuel plants (EPATFUEL)	Nuclear	No allocation
	EIOU	Patent fuel plants (EPATFUEL)	Hydro	No allocation
	EIOU	Patent fuel plants (EPATFUEL)	Geothermal	Water heat
	EIOU	Patent fuel plants (EPATFUEL)	Solar photovoltaics	No allocation
	EIOU	Patent fuel plants (EPATFUEL)	Solar thermal	Space heat
	EIOU	Patent fuel plants (EPATFUEL)	Tide, wave and ocean	No allocation
	EIOU	Patent fuel plants (EPATFUEL)	Wind	No allocation
	EIOU	Patent fuel plants (EPATFUEL)	Other sources	Water heat
	EIOU	Patent fuel plants (EPATFUEL)	Electricity	Electricity: Industry
	EIOU	Patent fuel plants (EPATFUEL)	Heat	Water heat
	EIOU	Patent fuel plants (EPATFUEL)	Oil shale and oil sands	No allocation
	EIOU	Patent fuel plants (EPATFUEL)	Peat products	MT industrial heat
	EIOU	Patent fuel plants (EPATFUEL)
	EIOU	BKB/peat briquette plants (EBKB)	Hard coal (if no detail)	MT industrial heat
	EIOU	BKB/peat briquette plants (EBKB)	Brown coal (if no detail)	MT industrial heat
	EIOU	BKB/peat briquette plants (EBKB)	Anthracite	MT industrial heat
	EIOU	BKB/peat briquette plants (EBKB)	Coking coal	MT industrial heat
	EIOU	BKB/peat briquette plants (EBKB)	Other bituminous coal	MT industrial heat
	EIOU	BKB/peat briquette plants (EBKB)	Sub-bituminous coal	MT industrial heat
	EIOU	BKB/peat briquette plants (EBKB)	Lignite	MT industrial heat
	EIOU	BKB/peat briquette plants (EBKB)	Peat	MT industrial heat
	EIOU	BKB/peat briquette plants (EBKB)	Patent fuel	MT industrial heat
	EIOU	BKB/peat briquette plants (EBKB)	Coke oven coke	HTH industrial heat
	EIOU	BKB/peat briquette plants (EBKB)	Gas coke	HTH industrial heat
	EIOU	BKB/peat briquette plants (EBKB)	Coal tar	MT industrial heat
	EIOU	BKB/peat briquette plants (EBKB)	BKB	MT industrial heat
	EIOU	BKB/peat briquette plants (EBKB)	Gas works gas	HTH industrial heat
	EIOU	BKB/peat briquette plants (EBKB)	Coke oven gas	HTH industrial heat
	EIOU	BKB/peat briquette plants (EBKB)	Blast furnace gas	HTH industrial heat
	EIOU	BKB/peat briquette plants (EBKB)	Other recovered gases	HTH industrial heat
	EIOU	BKB/peat briquette plants (EBKB)	Elec/heat output from non-specified manufactured gases	MT industrial heat
	EIOU	BKB/peat briquette plants (EBKB)	Industrial waste	MT industrial heat
	EIOU	BKB/peat briquette plants (EBKB)	Municipal waste (renewable)	MT industrial heat
	EIOU	BKB/peat briquette plants (EBKB)	Municipal waste (non-renewable)	MT industrial heat
	EIOU	BKB/peat briquette plants (EBKB)	Primary solid biofuels	MT industrial heat
	EIOU	BKB/peat briquette plants (EBKB)	Biogases	MT industrial heat
	EIOU	BKB/peat briquette plants (EBKB)	Biogasoline	Diesel industrial static
	EIOU	BKB/peat briquette plants (EBKB)	Biodiesels	Diesel industrial static
	EIOU	BKB/peat briquette plants (EBKB)	Other liquid biofuels	Diesel industrial static
	EIOU	BKB/peat briquette plants (EBKB)	Non-specified primary biofuels and waste	MT industrial heat
	EIOU	BKB/peat briquette plants (EBKB)	Charcoal	Water heat
	EIOU	BKB/peat briquette plants (EBKB)	Natural gas	MT industrial heat
	EIOU	BKB/peat briquette plants (EBKB)	Crude/NGL/feedstocks (if no detail)	MT industrial heat
	EIOU	BKB/peat briquette plants (EBKB)	Crude oil	MT industrial heat
	EIOU	BKB/peat briquette plants (EBKB)	Natural gas liquids	MT industrial heat
	EIOU	BKB/peat briquette plants (EBKB)	Refinery feedstocks	MT industrial heat
	EIOU	BKB/peat briquette plants (EBKB)	Additives/blending components	MT industrial heat
	EIOU	BKB/peat briquette plants (EBKB)	Other hydrocarbons	MT industrial heat
	EIOU	BKB/peat briquette plants (EBKB)	Refinery gas	MT industrial heat
	EIOU	BKB/peat briquette plants (EBKB)	Ethane	Water heat
	EIOU	BKB/peat briquette plants (EBKB)	Liquefied petroleum gases (LPG)	Diesel industrial static
	EIOU	BKB/peat briquette plants (EBKB)	Motor gasoline excl. biofuels	Diesel industrial static
	EIOU	BKB/peat briquette plants (EBKB)	Aviation gasoline	Diesel industrial static
	EIOU	BKB/peat briquette plants (EBKB)	Gasoline type jet fuel	Diesel industrial static
	EIOU	BKB/peat briquette plants (EBKB)	Kerosene type jet fuel excl. biofuels	Diesel industrial static
	EIOU	BKB/peat briquette plants (EBKB)	Other kerosene	Water heat
	EIOU	BKB/peat briquette plants (EBKB)	Gas/diesel oil excl. biofuels	Diesel industrial static
	EIOU	BKB/peat briquette plants (EBKB)	Fuel oil	MT industrial heat
	EIOU	BKB/peat briquette plants (EBKB)	Naphtha	Diesel industrial static
	EIOU	BKB/peat briquette plants (EBKB)	White spirit & SBP	Diesel industrial static
	EIOU	BKB/peat briquette plants (EBKB)	Lubricants	Diesel industrial static
	EIOU	BKB/peat briquette plants (EBKB)	Bitumen	Diesel industrial static
	EIOU	BKB/peat briquette plants (EBKB)	Paraffin waxes	Water heat
	EIOU	BKB/peat briquette plants (EBKB)	Petroleum coke	MT industrial heat
	EIOU	BKB/peat briquette plants (EBKB)	Other oil products	MT industrial heat
	EIOU	BKB/peat briquette plants (EBKB)	Heat output from non-specified combustible fuels	Water heat
	EIOU	BKB/peat briquette plants (EBKB)	Nuclear	No allocation
	EIOU	BKB/peat briquette plants (EBKB)	Hydro	No allocation
	EIOU	BKB/peat briquette plants (EBKB)	Geothermal	Water heat
	EIOU	BKB/peat briquette plants (EBKB)	Solar photovoltaics	No allocation
	EIOU	BKB/peat briquette plants (EBKB)	Solar thermal	Space heat
	EIOU	BKB/peat briquette plants (EBKB)	Tide, wave and ocean	No allocation
	EIOU	BKB/peat briquette plants (EBKB)	Wind	No allocation
	EIOU	BKB/peat briquette plants (EBKB)	Other sources	Water heat
	EIOU	BKB/peat briquette plants (EBKB)	Electricity	Electricity: Industry
	EIOU	BKB/peat briquette plants (EBKB)	Heat	Water heat
	EIOU	BKB/peat briquette plants (EBKB)	Oil shale and oil sands	No allocation
	EIOU	BKB/peat briquette plants (EBKB)	Peat products	MT industrial heat
	EIOU	BKB/peat briquette plants (EBKB)
	EIOU	Oil refineries (EREFINER)	Hard coal (if no detail)	MT industrial heat
	EIOU	Oil refineries (EREFINER)	Brown coal (if no detail)	MT industrial heat
	EIOU	Oil refineries (EREFINER)	Anthracite	MT industrial heat
	EIOU	Oil refineries (EREFINER)	Coking coal	MT industrial heat
	EIOU	Oil refineries (EREFINER)	Other bituminous coal	MT industrial heat
	EIOU	Oil refineries (EREFINER)	Sub-bituminous coal	MT industrial heat
	EIOU	Oil refineries (EREFINER)	Lignite	MT industrial heat
	EIOU	Oil refineries (EREFINER)	Peat	MT industrial heat
	EIOU	Oil refineries (EREFINER)	Patent fuel	MT industrial heat
	EIOU	Oil refineries (EREFINER)	Coke oven coke	HTH industrial heat
	EIOU	Oil refineries (EREFINER)	Gas coke	HTH industrial heat
	EIOU	Oil refineries (EREFINER)	Coal tar	MT industrial heat
	EIOU	Oil refineries (EREFINER)	BKB	MT industrial heat
	EIOU	Oil refineries (EREFINER)	Gas works gas	HTH industrial heat
	EIOU	Oil refineries (EREFINER)	Coke oven gas	HTH industrial heat
	EIOU	Oil refineries (EREFINER)	Blast furnace gas	HTH industrial heat
	EIOU	Oil refineries (EREFINER)	Other recovered gases	HTH industrial heat
	EIOU	Oil refineries (EREFINER)	Elec/heat output from non-specified manufactured gases	MT industrial heat
	EIOU	Oil refineries (EREFINER)	Industrial waste	MT industrial heat
	EIOU	Oil refineries (EREFINER)	Municipal waste (renewable)	MT industrial heat
	EIOU	Oil refineries (EREFINER)	Municipal waste (non-renewable)	MT industrial heat
	EIOU	Oil refineries (EREFINER)	Primary solid biofuels	MT industrial heat
	EIOU	Oil refineries (EREFINER)	Biogases	MT industrial heat
	EIOU	Oil refineries (EREFINER)	Biogasoline	Diesel industrial static
	EIOU	Oil refineries (EREFINER)	Biodiesels	Diesel industrial static
	EIOU	Oil refineries (EREFINER)	Other liquid biofuels	Diesel industrial static
	EIOU	Oil refineries (EREFINER)	Non-specified primary biofuels and waste	MT industrial heat
	EIOU	Oil refineries (EREFINER)	Charcoal	Water heat
	EIOU	Oil refineries (EREFINER)	Natural gas	MT industrial heat
	EIOU	Oil refineries (EREFINER)	Crude/NGL/feedstocks (if no detail)	MT industrial heat
	EIOU	Oil refineries (EREFINER)	Crude oil	MT industrial heat
	EIOU	Oil refineries (EREFINER)	Natural gas liquids	MT industrial heat
	EIOU	Oil refineries (EREFINER)	Refinery feedstocks	MT industrial heat
	EIOU	Oil refineries (EREFINER)	Additives/blending components	MT industrial heat
	EIOU	Oil refineries (EREFINER)	Other hydrocarbons	MT industrial heat
	EIOU	Oil refineries (EREFINER)	Refinery gas	MT industrial heat
	EIOU	Oil refineries (EREFINER)	Ethane	Water heat
	EIOU	Oil refineries (EREFINER)	Liquefied petroleum gases (LPG)	Diesel industrial static
	EIOU	Oil refineries (EREFINER)	Motor gasoline excl. biofuels	Diesel industrial static
	EIOU	Oil refineries (EREFINER)	Aviation gasoline	Diesel industrial static
	EIOU	Oil refineries (EREFINER)	Gasoline type jet fuel	Diesel industrial static
	EIOU	Oil refineries (EREFINER)	Kerosene type jet fuel excl. biofuels	Diesel industrial static
	EIOU	Oil refineries (EREFINER)	Other kerosene	Water heat
	EIOU	Oil refineries (EREFINER)	Gas/diesel oil excl. biofuels	Diesel industrial static
	EIOU	Oil refineries (EREFINER)	Fuel oil	MT industrial heat
	EIOU	Oil refineries (EREFINER)	Naphtha	Diesel industrial static
	EIOU	Oil refineries (EREFINER)	White spirit & SBP	Diesel industrial static
	EIOU	Oil refineries (EREFINER)	Lubricants	Diesel industrial static
	EIOU	Oil refineries (EREFINER)	Bitumen	Diesel industrial static
	EIOU	Oil refineries (EREFINER)	Paraffin waxes	Water heat
	EIOU	Oil refineries (EREFINER)	Petroleum coke	MT industrial heat
	EIOU	Oil refineries (EREFINER)	Other oil products	MT industrial heat
	EIOU	Oil refineries (EREFINER)	Heat output from non-specified combustible fuels	Water heat
	EIOU	Oil refineries (EREFINER)	Nuclear	No allocation
	EIOU	Oil refineries (EREFINER)	Hydro	No allocation
	EIOU	Oil refineries (EREFINER)	Geothermal	Water heat
	EIOU	Oil refineries (EREFINER)	Solar photovoltaics	No allocation
	EIOU	Oil refineries (EREFINER)	Solar thermal	Space heat
	EIOU	Oil refineries (EREFINER)	Tide, wave and ocean	No allocation
	EIOU	Oil refineries (EREFINER)	Wind	No allocation
	EIOU	Oil refineries (EREFINER)	Other sources	Water heat
	EIOU	Oil refineries (EREFINER)	Electricity	Electricity: Industry
	EIOU	Oil refineries (EREFINER)	Heat	Water heat
	EIOU	Oil refineries (EREFINER)	Oil shale and oil sands	No allocation
	EIOU	Oil refineries (EREFINER)	Peat products	MT industrial heat
	EIOU	Oil refineries (EREFINER)
	EIOU	Coal liquefaction plants (ECOALLIQ)	Hard coal (if no detail)	MT industrial heat
	EIOU	Coal liquefaction plants (ECOALLIQ)	Brown coal (if no detail)	MT industrial heat
	EIOU	Coal liquefaction plants (ECOALLIQ)	Anthracite	MT industrial heat
	EIOU	Coal liquefaction plants (ECOALLIQ)	Coking coal	MT industrial heat
	EIOU	Coal liquefaction plants (ECOALLIQ)	Other bituminous coal	MT industrial heat
	EIOU	Coal liquefaction plants (ECOALLIQ)	Sub-bituminous coal	MT industrial heat
	EIOU	Coal liquefaction plants (ECOALLIQ)	Lignite	MT industrial heat
	EIOU	Coal liquefaction plants (ECOALLIQ)	Peat	MT industrial heat
	EIOU	Coal liquefaction plants (ECOALLIQ)	Patent fuel	MT industrial heat
	EIOU	Coal liquefaction plants (ECOALLIQ)	Coke oven coke	HTH industrial heat
	EIOU	Coal liquefaction plants (ECOALLIQ)	Gas coke	HTH industrial heat
	EIOU	Coal liquefaction plants (ECOALLIQ)	Coal tar	MT industrial heat
	EIOU	Coal liquefaction plants (ECOALLIQ)	BKB	MT industrial heat
	EIOU	Coal liquefaction plants (ECOALLIQ)	Gas works gas	HTH industrial heat
	EIOU	Coal liquefaction plants (ECOALLIQ)	Coke oven gas	HTH industrial heat
	EIOU	Coal liquefaction plants (ECOALLIQ)	Blast furnace gas	HTH industrial heat
	EIOU	Coal liquefaction plants (ECOALLIQ)	Other recovered gases	HTH industrial heat
	EIOU	Coal liquefaction plants (ECOALLIQ)	Elec/heat output from non-specified manufactured gases	MT industrial heat
	EIOU	Coal liquefaction plants (ECOALLIQ)	Industrial waste	MT industrial heat
	EIOU	Coal liquefaction plants (ECOALLIQ)	Municipal waste (renewable)	MT industrial heat
	EIOU	Coal liquefaction plants (ECOALLIQ)	Municipal waste (non-renewable)	MT industrial heat
	EIOU	Coal liquefaction plants (ECOALLIQ)	Primary solid biofuels	MT industrial heat
	EIOU	Coal liquefaction plants (ECOALLIQ)	Biogases	MT industrial heat
	EIOU	Coal liquefaction plants (ECOALLIQ)	Biogasoline	Diesel industrial static
	EIOU	Coal liquefaction plants (ECOALLIQ)	Biodiesels	Diesel industrial static
	EIOU	Coal liquefaction plants (ECOALLIQ)	Other liquid biofuels	Diesel industrial static
	EIOU	Coal liquefaction plants (ECOALLIQ)	Non-specified primary biofuels and waste	MT industrial heat
	EIOU	Coal liquefaction plants (ECOALLIQ)	Charcoal	Water heat
	EIOU	Coal liquefaction plants (ECOALLIQ)	Natural gas	MT industrial heat
	EIOU	Coal liquefaction plants (ECOALLIQ)	Crude/NGL/feedstocks (if no detail)	MT industrial heat
	EIOU	Coal liquefaction plants (ECOALLIQ)	Crude oil	MT industrial heat
	EIOU	Coal liquefaction plants (ECOALLIQ)	Natural gas liquids	MT industrial heat
	EIOU	Coal liquefaction plants (ECOALLIQ)	Refinery feedstocks	MT industrial heat
	EIOU	Coal liquefaction plants (ECOALLIQ)	Additives/blending components	MT industrial heat
	EIOU	Coal liquefaction plants (ECOALLIQ)	Other hydrocarbons	MT industrial heat
	EIOU	Coal liquefaction plants (ECOALLIQ)	Refinery gas	MT industrial heat
	EIOU	Coal liquefaction plants (ECOALLIQ)	Ethane	Water heat
	EIOU	Coal liquefaction plants (ECOALLIQ)	Liquefied petroleum gases (LPG)	Diesel industrial static
	EIOU	Coal liquefaction plants (ECOALLIQ)	Motor gasoline excl. biofuels	Diesel industrial static
	EIOU	Coal liquefaction plants (ECOALLIQ)	Aviation gasoline	Diesel industrial static
	EIOU	Coal liquefaction plants (ECOALLIQ)	Gasoline type jet fuel	Diesel industrial static
	EIOU	Coal liquefaction plants (ECOALLIQ)	Kerosene type jet fuel excl. biofuels	Diesel industrial static
	EIOU	Coal liquefaction plants (ECOALLIQ)	Other kerosene	Water heat
	EIOU	Coal liquefaction plants (ECOALLIQ)	Gas/diesel oil excl. biofuels	Diesel industrial static
	EIOU	Coal liquefaction plants (ECOALLIQ)	Fuel oil	MT industrial heat
	EIOU	Coal liquefaction plants (ECOALLIQ)	Naphtha	Diesel industrial static
	EIOU	Coal liquefaction plants (ECOALLIQ)	White spirit & SBP	Diesel industrial static
	EIOU	Coal liquefaction plants (ECOALLIQ)	Lubricants	Diesel industrial static
	EIOU	Coal liquefaction plants (ECOALLIQ)	Bitumen	Diesel industrial static
	EIOU	Coal liquefaction plants (ECOALLIQ)	Paraffin waxes	Water heat
	EIOU	Coal liquefaction plants (ECOALLIQ)	Petroleum coke	MT industrial heat
	EIOU	Coal liquefaction plants (ECOALLIQ)	Other oil products	MT industrial heat
	EIOU	Coal liquefaction plants (ECOALLIQ)	Heat output from non-specified combustible fuels	Water heat
	EIOU	Coal liquefaction plants (ECOALLIQ)	Nuclear	No allocation
	EIOU	Coal liquefaction plants (ECOALLIQ)	Hydro	No allocation
	EIOU	Coal liquefaction plants (ECOALLIQ)	Geothermal	Water heat
	EIOU	Coal liquefaction plants (ECOALLIQ)	Solar photovoltaics	No allocation
	EIOU	Coal liquefaction plants (ECOALLIQ)	Solar thermal	Space heat
	EIOU	Coal liquefaction plants (ECOALLIQ)	Tide, wave and ocean	No allocation
	EIOU	Coal liquefaction plants (ECOALLIQ)	Wind	No allocation
	EIOU	Coal liquefaction plants (ECOALLIQ)	Other sources	Water heat
	EIOU	Coal liquefaction plants (ECOALLIQ)	Electricity	Electricity: Industry
	EIOU	Coal liquefaction plants (ECOALLIQ)	Heat	Water heat
	EIOU	Coal liquefaction plants (ECOALLIQ)	Oil shale and oil sands	No allocation
	EIOU	Coal liquefaction plants (ECOALLIQ)	Peat products	MT industrial heat
	EIOU	Coal liquefaction plants (ECOALLIQ)
	EIOU	Liquefaction (LNG) / regasification plants	Hard coal (if no detail)	MT industrial heat
	EIOU	Liquefaction (LNG) / regasification plants	Brown coal (if no detail)	MT industrial heat
	EIOU	Liquefaction (LNG) / regasification plants	Anthracite	MT industrial heat
	EIOU	Liquefaction (LNG) / regasification plants	Coking coal	MT industrial heat
	EIOU	Liquefaction (LNG) / regasification plants	Other bituminous coal	MT industrial heat
	EIOU	Liquefaction (LNG) / regasification plants	Sub-bituminous coal	MT industrial heat
	EIOU	Liquefaction (LNG) / regasification plants	Lignite	MT industrial heat
	EIOU	Liquefaction (LNG) / regasification plants	Peat	MT industrial heat
	EIOU	Liquefaction (LNG) / regasification plants	Patent fuel	MT industrial heat
	EIOU	Liquefaction (LNG) / regasification plants	Coke oven coke	HTH industrial heat
	EIOU	Liquefaction (LNG) / regasification plants	Gas coke	HTH industrial heat
	EIOU	Liquefaction (LNG) / regasification plants	Coal tar	MT industrial heat
	EIOU	Liquefaction (LNG) / regasification plants	BKB	MT industrial heat
	EIOU	Liquefaction (LNG) / regasification plants	Gas works gas	HTH industrial heat
	EIOU	Liquefaction (LNG) / regasification plants	Coke oven gas	HTH industrial heat
	EIOU	Liquefaction (LNG) / regasification plants	Blast furnace gas	HTH industrial heat
	EIOU	Liquefaction (LNG) / regasification plants	Other recovered gases	HTH industrial heat
	EIOU	Liquefaction (LNG) / regasification plants	Elec/heat output from non-specified manufactured gases	MT industrial heat
	EIOU	Liquefaction (LNG) / regasification plants	Industrial waste	MT industrial heat
	EIOU	Liquefaction (LNG) / regasification plants	Municipal waste (renewable)	MT industrial heat
	EIOU	Liquefaction (LNG) / regasification plants	Municipal waste (non-renewable)	MT industrial heat
	EIOU	Liquefaction (LNG) / regasification plants	Primary solid biofuels	MT industrial heat
	EIOU	Liquefaction (LNG) / regasification plants	Biogases	MT industrial heat
	EIOU	Liquefaction (LNG) / regasification plants	Biogasoline	Diesel industrial static
	EIOU	Liquefaction (LNG) / regasification plants	Biodiesels	Diesel industrial static
	EIOU	Liquefaction (LNG) / regasification plants	Other liquid biofuels	Diesel industrial static
	EIOU	Liquefaction (LNG) / regasification plants	Non-specified primary biofuels and waste	MT industrial heat
	EIOU	Liquefaction (LNG) / regasification plants	Charcoal	Water heat
	EIOU	Liquefaction (LNG) / regasification plants	Natural gas	MT industrial heat
	EIOU	Liquefaction (LNG) / regasification plants	Crude/NGL/feedstocks (if no detail)	MT industrial heat
	EIOU	Liquefaction (LNG) / regasification plants	Crude oil	MT industrial heat
	EIOU	Liquefaction (LNG) / regasification plants	Natural gas liquids	MT industrial heat
	EIOU	Liquefaction (LNG) / regasification plants	Refinery feedstocks	MT industrial heat
	EIOU	Liquefaction (LNG) / regasification plants	Additives/blending components	MT industrial heat
	EIOU	Liquefaction (LNG) / regasification plants	Other hydrocarbons	MT industrial heat
	EIOU	Liquefaction (LNG) / regasification plants	Refinery gas	MT industrial heat
	EIOU	Liquefaction (LNG) / regasification plants	Ethane	Water heat
	EIOU	Liquefaction (LNG) / regasification plants	Liquefied petroleum gases (LPG)	Diesel industrial static
	EIOU	Liquefaction (LNG) / regasification plants	Motor gasoline excl. biofuels	Diesel industrial static
	EIOU	Liquefaction (LNG) / regasification plants	Aviation gasoline	Diesel industrial static
	EIOU	Liquefaction (LNG) / regasification plants	Gasoline type jet fuel	Diesel industrial static
	EIOU	Liquefaction (LNG) / regasification plants	Kerosene type jet fuel excl. biofuels	Diesel industrial static
	EIOU	Liquefaction (LNG) / regasification plants	Other kerosene	Water heat
	EIOU	Liquefaction (LNG) / regasification plants	Gas/diesel oil excl. biofuels	Diesel industrial static
	EIOU	Liquefaction (LNG) / regasification plants	Fuel oil	MT industrial heat
	EIOU	Liquefaction (LNG) / regasification plants	Naphtha	Diesel industrial static
	EIOU	Liquefaction (LNG) / regasification plants	White spirit & SBP	Diesel industrial static
	EIOU	Liquefaction (LNG) / regasification plants	Lubricants	Diesel industrial static
	EIOU	Liquefaction (LNG) / regasification plants	Bitumen	Diesel industrial static
	EIOU	Liquefaction (LNG) / regasification plants	Paraffin waxes	Water heat
	EIOU	Liquefaction (LNG) / regasification plants	Petroleum coke	MT industrial heat
	EIOU	Liquefaction (LNG) / regasification plants	Other oil products	MT industrial heat
	EIOU	Liquefaction (LNG) / regasification plants	Heat output from non-specified combustible fuels	Water heat
	EIOU	Liquefaction (LNG) / regasification plants	Nuclear	No allocation
	EIOU	Liquefaction (LNG) / regasification plants	Hydro	No allocation
	EIOU	Liquefaction (LNG) / regasification plants	Geothermal	Water heat
	EIOU	Liquefaction (LNG) / regasification plants	Solar photovoltaics	No allocation
	EIOU	Liquefaction (LNG) / regasification plants	Solar thermal	Space heat
	EIOU	Liquefaction (LNG) / regasification plants	Tide, wave and ocean	No allocation
	EIOU	Liquefaction (LNG) / regasification plants	Wind	No allocation
	EIOU	Liquefaction (LNG) / regasification plants	Other sources	Water heat
	EIOU	Liquefaction (LNG) / regasification plants	Electricity	Electricity: Industry
	EIOU	Liquefaction (LNG) / regasification plants	Heat	Water heat
	EIOU	Liquefaction (LNG) / regasification plants	Oil shale and oil sands	No allocation
	EIOU	Liquefaction (LNG) / regasification plants	Peat products	MT industrial heat
	EIOU	Liquefaction (LNG) / regasification plants
	EIOU	Gas-to-liquids (GTL) plants (EGTL)	Hard coal (if no detail)	MT industrial heat
	EIOU	Gas-to-liquids (GTL) plants (EGTL)	Brown coal (if no detail)	MT industrial heat
	EIOU	Gas-to-liquids (GTL) plants (EGTL)	Anthracite	MT industrial heat
	EIOU	Gas-to-liquids (GTL) plants (EGTL)	Coking coal	MT industrial heat
	EIOU	Gas-to-liquids (GTL) plants (EGTL)	Other bituminous coal	MT industrial heat
	EIOU	Gas-to-liquids (GTL) plants (EGTL)	Sub-bituminous coal	MT industrial heat
	EIOU	Gas-to-liquids (GTL) plants (EGTL)	Lignite	MT industrial heat
	EIOU	Gas-to-liquids (GTL) plants (EGTL)	Peat	MT industrial heat
	EIOU	Gas-to-liquids (GTL) plants (EGTL)	Patent fuel	MT industrial heat
	EIOU	Gas-to-liquids (GTL) plants (EGTL)	Coke oven coke	HTH industrial heat
	EIOU	Gas-to-liquids (GTL) plants (EGTL)	Gas coke	HTH industrial heat
	EIOU	Gas-to-liquids (GTL) plants (EGTL)	Coal tar	MT industrial heat
	EIOU	Gas-to-liquids (GTL) plants (EGTL)	BKB	MT industrial heat
	EIOU	Gas-to-liquids (GTL) plants (EGTL)	Gas works gas	HTH industrial heat
	EIOU	Gas-to-liquids (GTL) plants (EGTL)	Coke oven gas	HTH industrial heat
	EIOU	Gas-to-liquids (GTL) plants (EGTL)	Blast furnace gas	HTH industrial heat
	EIOU	Gas-to-liquids (GTL) plants (EGTL)	Other recovered gases	HTH industrial heat
	EIOU	Gas-to-liquids (GTL) plants (EGTL)	Elec/heat output from non-specified manufactured gases	MT industrial heat
	EIOU	Gas-to-liquids (GTL) plants (EGTL)	Industrial waste	MT industrial heat
	EIOU	Gas-to-liquids (GTL) plants (EGTL)	Municipal waste (renewable)	MT industrial heat
	EIOU	Gas-to-liquids (GTL) plants (EGTL)	Municipal waste (non-renewable)	MT industrial heat
	EIOU	Gas-to-liquids (GTL) plants (EGTL)	Primary solid biofuels	MT industrial heat
	EIOU	Gas-to-liquids (GTL) plants (EGTL)	Biogases	MT industrial heat
	EIOU	Gas-to-liquids (GTL) plants (EGTL)	Biogasoline	Diesel industrial static
	EIOU	Gas-to-liquids (GTL) plants (EGTL)	Biodiesels	Diesel industrial static
	EIOU	Gas-to-liquids (GTL) plants (EGTL)	Other liquid biofuels	Diesel industrial static
	EIOU	Gas-to-liquids (GTL) plants (EGTL)	Non-specified primary biofuels and waste	MT industrial heat
	EIOU	Gas-to-liquids (GTL) plants (EGTL)	Charcoal	Water heat
	EIOU	Gas-to-liquids (GTL) plants (EGTL)	Natural gas	MT industrial heat
	EIOU	Gas-to-liquids (GTL) plants (EGTL)	Crude/NGL/feedstocks (if no detail)	MT industrial heat
	EIOU	Gas-to-liquids (GTL) plants (EGTL)	Crude oil	MT industrial heat
	EIOU	Gas-to-liquids (GTL) plants (EGTL)	Natural gas liquids	MT industrial heat
	EIOU	Gas-to-liquids (GTL) plants (EGTL)	Refinery feedstocks	MT industrial heat
	EIOU	Gas-to-liquids (GTL) plants (EGTL)	Additives/blending components	MT industrial heat
	EIOU	Gas-to-liquids (GTL) plants (EGTL)	Other hydrocarbons	MT industrial heat
	EIOU	Gas-to-liquids (GTL) plants (EGTL)	Refinery gas	MT industrial heat
	EIOU	Gas-to-liquids (GTL) plants (EGTL)	Ethane	Water heat
	EIOU	Gas-to-liquids (GTL) plants (EGTL)	Liquefied petroleum gases (LPG)	Diesel industrial static
	EIOU	Gas-to-liquids (GTL) plants (EGTL)	Motor gasoline excl. biofuels	Diesel industrial static
	EIOU	Gas-to-liquids (GTL) plants (EGTL)	Aviation gasoline	Diesel industrial static
	EIOU	Gas-to-liquids (GTL) plants (EGTL)	Gasoline type jet fuel	Diesel industrial static
	EIOU	Gas-to-liquids (GTL) plants (EGTL)	Kerosene type jet fuel excl. biofuels	Diesel industrial static
	EIOU	Gas-to-liquids (GTL) plants (EGTL)	Other kerosene	Water heat
	EIOU	Gas-to-liquids (GTL) plants (EGTL)	Gas/diesel oil excl. biofuels	Diesel industrial static
	EIOU	Gas-to-liquids (GTL) plants (EGTL)	Fuel oil	MT industrial heat
	EIOU	Gas-to-liquids (GTL) plants (EGTL)	Naphtha	Diesel industrial static
	EIOU	Gas-to-liquids (GTL) plants (EGTL)	White spirit & SBP	Diesel industrial static
	EIOU	Gas-to-liquids (GTL) plants (EGTL)	Lubricants	Diesel industrial static
	EIOU	Gas-to-liquids (GTL) plants (EGTL)	Bitumen	Diesel industrial static
	EIOU	Gas-to-liquids (GTL) plants (EGTL)	Paraffin waxes	Water heat
	EIOU	Gas-to-liquids (GTL) plants (EGTL)	Petroleum coke	MT industrial heat
	EIOU	Gas-to-liquids (GTL) plants (EGTL)	Other oil products	MT industrial heat
	EIOU	Gas-to-liquids (GTL) plants (EGTL)	Heat output from non-specified combustible fuels	Water heat
	EIOU	Gas-to-liquids (GTL) plants (EGTL)	Nuclear	No allocation
	EIOU	Gas-to-liquids (GTL) plants (EGTL)	Hydro	No allocation
	EIOU	Gas-to-liquids (GTL) plants (EGTL)	Geothermal	Water heat
	EIOU	Gas-to-liquids (GTL) plants (EGTL)	Solar photovoltaics	No allocation
	EIOU	Gas-to-liquids (GTL) plants (EGTL)	Solar thermal	Space heat
	EIOU	Gas-to-liquids (GTL) plants (EGTL)	Tide, wave and ocean	No allocation
	EIOU	Gas-to-liquids (GTL) plants (EGTL)	Wind	No allocation
	EIOU	Gas-to-liquids (GTL) plants (EGTL)	Other sources	Water heat
	EIOU	Gas-to-liquids (GTL) plants (EGTL)	Electricity	Electricity: Industry
	EIOU	Gas-to-liquids (GTL) plants (EGTL)	Heat	Water heat
	EIOU	Gas-to-liquids (GTL) plants (EGTL)	Oil shale and oil sands	No allocation
	EIOU	Gas-to-liquids (GTL) plants (EGTL)	Peat products	MT industrial heat
	EIOU	Gas-to-liquids (GTL) plants (EGTL)
	EIOU	Own use in electricity, CHP and heat plants	Hard coal (if no detail)	MT industrial heat
	EIOU	Own use in electricity, CHP and heat plants	Brown coal (if no detail)	MT industrial heat
	EIOU	Own use in electricity, CHP and heat plants	Anthracite	MT industrial heat
	EIOU	Own use in electricity, CHP and heat plants	Coking coal	MT industrial heat
	EIOU	Own use in electricity, CHP and heat plants	Other bituminous coal	MT industrial heat
	EIOU	Own use in electricity, CHP and heat plants	Sub-bituminous coal	MT industrial heat
	EIOU	Own use in electricity, CHP and heat plants	Lignite	MT industrial heat
	EIOU	Own use in electricity, CHP and heat plants	Peat	MT industrial heat
	EIOU	Own use in electricity, CHP and heat plants	Patent fuel	MT industrial heat
	EIOU	Own use in electricity, CHP and heat plants	Coke oven coke	HTH industrial heat
	EIOU	Own use in electricity, CHP and heat plants	Gas coke	HTH industrial heat
	EIOU	Own use in electricity, CHP and heat plants	Coal tar	MT industrial heat
	EIOU	Own use in electricity, CHP and heat plants	BKB	MT industrial heat
	EIOU	Own use in electricity, CHP and heat plants	Gas works gas	HTH industrial heat
	EIOU	Own use in electricity, CHP and heat plants	Coke oven gas	HTH industrial heat
	EIOU	Own use in electricity, CHP and heat plants	Blast furnace gas	HTH industrial heat
	EIOU	Own use in electricity, CHP and heat plants	Other recovered gases	HTH industrial heat
	EIOU	Own use in electricity, CHP and heat plants	Elec/heat output from non-specified manufactured gases	MT industrial heat
	EIOU	Own use in electricity, CHP and heat plants	Industrial waste	MT industrial heat
	EIOU	Own use in electricity, CHP and heat plants	Municipal waste (renewable)	MT industrial heat
	EIOU	Own use in electricity, CHP and heat plants	Municipal waste (non-renewable)	MT industrial heat
	EIOU	Own use in electricity, CHP and heat plants	Primary solid biofuels	MT industrial heat
	EIOU	Own use in electricity, CHP and heat plants	Biogases	MT industrial heat
	EIOU	Own use in electricity, CHP and heat plants	Biogasoline	Diesel industrial static
	EIOU	Own use in electricity, CHP and heat plants	Biodiesels	Diesel industrial static
	EIOU	Own use in electricity, CHP and heat plants	Other liquid biofuels	Diesel industrial static
	EIOU	Own use in electricity, CHP and heat plants	Non-specified primary biofuels and waste	MT industrial heat
	EIOU	Own use in electricity, CHP and heat plants	Charcoal	Water heat
	EIOU	Own use in electricity, CHP and heat plants	Natural gas	MT industrial heat
	EIOU	Own use in electricity, CHP and heat plants	Crude/NGL/feedstocks (if no detail)	MT industrial heat
	EIOU	Own use in electricity, CHP and heat plants	Crude oil	MT industrial heat
	EIOU	Own use in electricity, CHP and heat plants	Natural gas liquids	MT industrial heat
	EIOU	Own use in electricity, CHP and heat plants	Refinery feedstocks	MT industrial heat
	EIOU	Own use in electricity, CHP and heat plants	Additives/blending components	MT industrial heat
	EIOU	Own use in electricity, CHP and heat plants	Other hydrocarbons	MT industrial heat
	EIOU	Own use in electricity, CHP and heat plants	Refinery gas	MT industrial heat
	EIOU	Own use in electricity, CHP and heat plants	Ethane	Water heat
	EIOU	Own use in electricity, CHP and heat plants	Liquefied petroleum gases (LPG)	Diesel industrial static
	EIOU	Own use in electricity, CHP and heat plants	Motor gasoline excl. biofuels	Diesel industrial static
	EIOU	Own use in electricity, CHP and heat plants	Aviation gasoline	Diesel industrial static
	EIOU	Own use in electricity, CHP and heat plants	Gasoline type jet fuel	Diesel industrial static
	EIOU	Own use in electricity, CHP and heat plants	Kerosene type jet fuel excl. biofuels	Diesel industrial static
	EIOU	Own use in electricity, CHP and heat plants	Other kerosene	Water heat
	EIOU	Own use in electricity, CHP and heat plants	Gas/diesel oil excl. biofuels	Diesel industrial static
	EIOU	Own use in electricity, CHP and heat plants	Fuel oil	MT industrial heat
	EIOU	Own use in electricity, CHP and heat plants	Naphtha	Diesel industrial static
	EIOU	Own use in electricity, CHP and heat plants	White spirit & SBP	Diesel industrial static
	EIOU	Own use in electricity, CHP and heat plants	Lubricants	Diesel industrial static
	EIOU	Own use in electricity, CHP and heat plants	Bitumen	Diesel industrial static
	EIOU	Own use in electricity, CHP and heat plants	Paraffin waxes	Water heat
	EIOU	Own use in electricity, CHP and heat plants	Petroleum coke	MT industrial heat
	EIOU	Own use in electricity, CHP and heat plants	Other oil products	MT industrial heat
	EIOU	Own use in electricity, CHP and heat plants	Heat output from non-specified combustible fuels	Water heat
	EIOU	Own use in electricity, CHP and heat plants	Nuclear	No allocation
	EIOU	Own use in electricity, CHP and heat plants	Hydro	No allocation
	EIOU	Own use in electricity, CHP and heat plants	Geothermal	Water heat
	EIOU	Own use in electricity, CHP and heat plants	Solar photovoltaics	No allocation
	EIOU	Own use in electricity, CHP and heat plants	Solar thermal	Space heat
	EIOU	Own use in electricity, CHP and heat plants	Tide, wave and ocean	No allocation
	EIOU	Own use in electricity, CHP and heat plants	Wind	No allocation
	EIOU	Own use in electricity, CHP and heat plants	Other sources	Water heat
	EIOU	Own use in electricity, CHP and heat plants	Electricity	Electricity: Industry
	EIOU	Own use in electricity, CHP and heat plants	Heat	Water heat
	EIOU	Own use in electricity, CHP and heat plants	Oil shale and oil sands	No allocation
	EIOU	Own use in electricity, CHP and heat plants	Peat products	MT industrial heat
	EIOU	Own use in electricity, CHP and heat plants
	EIOU	Pumped storage plants	Hard coal (if no detail)	MT industrial heat
	EIOU	Pumped storage plants	Brown coal (if no detail)	MT industrial heat
	EIOU	Pumped storage plants	Anthracite	MT industrial heat
	EIOU	Pumped storage plants	Coking coal	MT industrial heat
	EIOU	Pumped storage plants	Other bituminous coal	MT industrial heat
	EIOU	Pumped storage plants	Sub-bituminous coal	MT industrial heat
	EIOU	Pumped storage plants	Lignite	MT industrial heat
	EIOU	Pumped storage plants	Peat	MT industrial heat
	EIOU	Pumped storage plants	Patent fuel	MT industrial heat
	EIOU	Pumped storage plants	Coke oven coke	HTH industrial heat
	EIOU	Pumped storage plants	Gas coke	HTH industrial heat
	EIOU	Pumped storage plants	Coal tar	MT industrial heat
	EIOU	Pumped storage plants	BKB	MT industrial heat
	EIOU	Pumped storage plants	Gas works gas	HTH industrial heat
	EIOU	Pumped storage plants	Coke oven gas	HTH industrial heat
	EIOU	Pumped storage plants	Blast furnace gas	HTH industrial heat
	EIOU	Pumped storage plants	Other recovered gases	HTH industrial heat
	EIOU	Pumped storage plants	Elec/heat output from non-specified manufactured gases	MT industrial heat
	EIOU	Pumped storage plants	Industrial waste	MT industrial heat
	EIOU	Pumped storage plants	Municipal waste (renewable)	MT industrial heat
	EIOU	Pumped storage plants	Municipal waste (non-renewable)	MT industrial heat
	EIOU	Pumped storage plants	Primary solid biofuels	MT industrial heat
	EIOU	Pumped storage plants	Biogases	MT industrial heat
	EIOU	Pumped storage plants	Biogasoline	Diesel industrial static
	EIOU	Pumped storage plants	Biodiesels	Diesel industrial static
	EIOU	Pumped storage plants	Other liquid biofuels	Diesel industrial static
	EIOU	Pumped storage plants	Non-specified primary biofuels and waste	MT industrial heat
	EIOU	Pumped storage plants	Charcoal	Water heat
	EIOU	Pumped storage plants	Natural gas	MT industrial heat
	EIOU	Pumped storage plants	Crude/NGL/feedstocks (if no detail)	MT industrial heat
	EIOU	Pumped storage plants	Crude oil	MT industrial heat
	EIOU	Pumped storage plants	Natural gas liquids	MT industrial heat
	EIOU	Pumped storage plants	Refinery feedstocks	MT industrial heat
	EIOU	Pumped storage plants	Additives/blending components	MT industrial heat
	EIOU	Pumped storage plants	Other hydrocarbons	MT industrial heat
	EIOU	Pumped storage plants	Refinery gas	MT industrial heat
	EIOU	Pumped storage plants	Ethane	Water heat
	EIOU	Pumped storage plants	Liquefied petroleum gases (LPG)	Diesel industrial static
	EIOU	Pumped storage plants	Motor gasoline excl. biofuels	Diesel industrial static
	EIOU	Pumped storage plants	Aviation gasoline	Diesel industrial static
	EIOU	Pumped storage plants	Gasoline type jet fuel	Diesel industrial static
	EIOU	Pumped storage plants	Kerosene type jet fuel excl. biofuels	Diesel industrial static
	EIOU	Pumped storage plants	Other kerosene	Water heat
	EIOU	Pumped storage plants	Gas/diesel oil excl. biofuels	Diesel industrial static
	EIOU	Pumped storage plants	Fuel oil	MT industrial heat
	EIOU	Pumped storage plants	Naphtha	Diesel industrial static
	EIOU	Pumped storage plants	White spirit & SBP	Diesel industrial static
	EIOU	Pumped storage plants	Lubricants	Diesel industrial static
	EIOU	Pumped storage plants	Bitumen	Diesel industrial static
	EIOU	Pumped storage plants	Paraffin waxes	Water heat
	EIOU	Pumped storage plants	Petroleum coke	MT industrial heat
	EIOU	Pumped storage plants	Other oil products	MT industrial heat
	EIOU	Pumped storage plants	Heat output from non-specified combustible fuels	Water heat
	EIOU	Pumped storage plants	Nuclear	No allocation
	EIOU	Pumped storage plants	Hydro	No allocation
	EIOU	Pumped storage plants	Geothermal	Water heat
	EIOU	Pumped storage plants	Solar photovoltaics	No allocation
	EIOU	Pumped storage plants	Solar thermal	Space heat
	EIOU	Pumped storage plants	Tide, wave and ocean	No allocation
	EIOU	Pumped storage plants	Wind	No allocation
	EIOU	Pumped storage plants	Other sources	Water heat
	EIOU	Pumped storage plants	Electricity	Electricity: Industry
	EIOU	Pumped storage plants	Heat	Water heat
	EIOU	Pumped storage plants	Oil shale and oil sands	No allocation
	EIOU	Pumped storage plants	Peat products	MT industrial heat
	EIOU	Pumped storage plants
	EIOU	Nuclear industry	Hard coal (if no detail)	MT industrial heat
	EIOU	Nuclear industry	Brown coal (if no detail)	MT industrial heat
	EIOU	Nuclear industry	Anthracite	MT industrial heat
	EIOU	Nuclear industry	Coking coal	MT industrial heat
	EIOU	Nuclear industry	Other bituminous coal	MT industrial heat
	EIOU	Nuclear industry	Sub-bituminous coal	MT industrial heat
	EIOU	Nuclear industry	Lignite	MT industrial heat
	EIOU	Nuclear industry	Peat	MT industrial heat
	EIOU	Nuclear industry	Patent fuel	MT industrial heat
	EIOU	Nuclear industry	Coke oven coke	HTH industrial heat
	EIOU	Nuclear industry	Gas coke	HTH industrial heat
	EIOU	Nuclear industry	Coal tar	MT industrial heat
	EIOU	Nuclear industry	BKB	MT industrial heat
	EIOU	Nuclear industry	Gas works gas	HTH industrial heat
	EIOU	Nuclear industry	Coke oven gas	HTH industrial heat
	EIOU	Nuclear industry	Blast furnace gas	HTH industrial heat
	EIOU	Nuclear industry	Other recovered gases	HTH industrial heat
	EIOU	Nuclear industry	Elec/heat output from non-specified manufactured gases	MT industrial heat
	EIOU	Nuclear industry	Industrial waste	MT industrial heat
	EIOU	Nuclear industry	Municipal waste (renewable)	MT industrial heat
	EIOU	Nuclear industry	Municipal waste (non-renewable)	MT industrial heat
	EIOU	Nuclear industry	Primary solid biofuels	MT industrial heat
	EIOU	Nuclear industry	Biogases	MT industrial heat
	EIOU	Nuclear industry	Biogasoline	Diesel industrial static
	EIOU	Nuclear industry	Biodiesels	Diesel industrial static
	EIOU	Nuclear industry	Other liquid biofuels	Diesel industrial static
	EIOU	Nuclear industry	Non-specified primary biofuels and waste	MT industrial heat
	EIOU	Nuclear industry	Charcoal	Water heat
	EIOU	Nuclear industry	Natural gas	MT industrial heat
	EIOU	Nuclear industry	Crude/NGL/feedstocks (if no detail)	MT industrial heat
	EIOU	Nuclear industry	Crude oil	MT industrial heat
	EIOU	Nuclear industry	Natural gas liquids	MT industrial heat
	EIOU	Nuclear industry	Refinery feedstocks	MT industrial heat
	EIOU	Nuclear industry	Additives/blending components	MT industrial heat
	EIOU	Nuclear industry	Other hydrocarbons	MT industrial heat
	EIOU	Nuclear industry	Refinery gas	MT industrial heat
	EIOU	Nuclear industry	Ethane	Water heat
	EIOU	Nuclear industry	Liquefied petroleum gases (LPG)	Diesel industrial static
	EIOU	Nuclear industry	Motor gasoline excl. biofuels	Diesel industrial static
	EIOU	Nuclear industry	Aviation gasoline	Diesel industrial static
	EIOU	Nuclear industry	Gasoline type jet fuel	Diesel industrial static
	EIOU	Nuclear industry	Kerosene type jet fuel excl. biofuels	Diesel industrial static
	EIOU	Nuclear industry	Other kerosene	Water heat
	EIOU	Nuclear industry	Gas/diesel oil excl. biofuels	Diesel industrial static
	EIOU	Nuclear industry	Fuel oil	MT industrial heat
	EIOU	Nuclear industry	Naphtha	Diesel industrial static
	EIOU	Nuclear industry	White spirit & SBP	Diesel industrial static
	EIOU	Nuclear industry	Lubricants	Diesel industrial static
	EIOU	Nuclear industry	Bitumen	Diesel industrial static
	EIOU	Nuclear industry	Paraffin waxes	Water heat
	EIOU	Nuclear industry	Petroleum coke	MT industrial heat
	EIOU	Nuclear industry	Other oil products	MT industrial heat
	EIOU	Nuclear industry	Heat output from non-specified combustible fuels	Water heat
	EIOU	Nuclear industry	Nuclear	No allocation
	EIOU	Nuclear industry	Hydro	No allocation
	EIOU	Nuclear industry	Geothermal	Water heat
	EIOU	Nuclear industry	Solar photovoltaics	No allocation
	EIOU	Nuclear industry	Solar thermal	Space heat
	EIOU	Nuclear industry	Tide, wave and ocean	No allocation
	EIOU	Nuclear industry	Wind	No allocation
	EIOU	Nuclear industry	Other sources	Water heat
	EIOU	Nuclear industry	Electricity	Electricity: Industry
	EIOU	Nuclear industry	Heat	Water heat
	EIOU	Nuclear industry	Oil shale and oil sands	No allocation
	EIOU	Nuclear industry	Peat products	MT industrial heat
	EIOU	Nuclear industry
	EIOU	Charcoal production plants (ECHARCOAL)	Hard coal (if no detail)	MT industrial heat
	EIOU	Charcoal production plants (ECHARCOAL)	Brown coal (if no detail)	MT industrial heat
	EIOU	Charcoal production plants (ECHARCOAL)	Anthracite	MT industrial heat
	EIOU	Charcoal production plants (ECHARCOAL)	Coking coal	MT industrial heat
	EIOU	Charcoal production plants (ECHARCOAL)	Other bituminous coal	MT industrial heat
	EIOU	Charcoal production plants (ECHARCOAL)	Sub-bituminous coal	MT industrial heat
	EIOU	Charcoal production plants (ECHARCOAL)	Lignite	MT industrial heat
	EIOU	Charcoal production plants (ECHARCOAL)	Peat	MT industrial heat
	EIOU	Charcoal production plants (ECHARCOAL)	Patent fuel	MT industrial heat
	EIOU	Charcoal production plants (ECHARCOAL)	Coke oven coke	HTH industrial heat
	EIOU	Charcoal production plants (ECHARCOAL)	Gas coke	HTH industrial heat
	EIOU	Charcoal production plants (ECHARCOAL)	Coal tar	MT industrial heat
	EIOU	Charcoal production plants (ECHARCOAL)	BKB	MT industrial heat
	EIOU	Charcoal production plants (ECHARCOAL)	Gas works gas	HTH industrial heat
	EIOU	Charcoal production plants (ECHARCOAL)	Coke oven gas	HTH industrial heat
	EIOU	Charcoal production plants (ECHARCOAL)	Blast furnace gas	HTH industrial heat
	EIOU	Charcoal production plants (ECHARCOAL)	Other recovered gases	HTH industrial heat
	EIOU	Charcoal production plants (ECHARCOAL)	Elec/heat output from non-specified manufactured gases	MT industrial heat
	EIOU	Charcoal production plants (ECHARCOAL)	Industrial waste	MT industrial heat
	EIOU	Charcoal production plants (ECHARCOAL)	Municipal waste (renewable)	MT industrial heat
	EIOU	Charcoal production plants (ECHARCOAL)	Municipal waste (non-renewable)	MT industrial heat
	EIOU	Charcoal production plants (ECHARCOAL)	Primary solid biofuels	MT industrial heat
	EIOU	Charcoal production plants (ECHARCOAL)	Biogases	MT industrial heat
	EIOU	Charcoal production plants (ECHARCOAL)	Biogasoline	Diesel industrial static
	EIOU	Charcoal production plants (ECHARCOAL)	Biodiesels	Diesel industrial static
	EIOU	Charcoal production plants (ECHARCOAL)	Other liquid biofuels	Diesel industrial static
	EIOU	Charcoal production plants (ECHARCOAL)	Non-specified primary biofuels and waste	MT industrial heat
	EIOU	Charcoal production plants (ECHARCOAL)	Charcoal	Water heat
	EIOU	Charcoal production plants (ECHARCOAL)	Natural gas	MT industrial heat
	EIOU	Charcoal production plants (ECHARCOAL)	Crude/NGL/feedstocks (if no detail)	MT industrial heat
	EIOU	Charcoal production plants (ECHARCOAL)	Crude oil	MT industrial heat
	EIOU	Charcoal production plants (ECHARCOAL)	Natural gas liquids	MT industrial heat
	EIOU	Charcoal production plants (ECHARCOAL)	Refinery feedstocks	MT industrial heat
	EIOU	Charcoal production plants (ECHARCOAL)	Additives/blending components	MT industrial heat
	EIOU	Charcoal production plants (ECHARCOAL)	Other hydrocarbons	MT industrial heat
	EIOU	Charcoal production plants (ECHARCOAL)	Refinery gas	MT industrial heat
	EIOU	Charcoal production plants (ECHARCOAL)	Ethane	Water heat
	EIOU	Charcoal production plants (ECHARCOAL)	Liquefied petroleum gases (LPG)	Diesel industrial static
	EIOU	Charcoal production plants (ECHARCOAL)	Motor gasoline excl. biofuels	Diesel industrial static
	EIOU	Charcoal production plants (ECHARCOAL)	Aviation gasoline	Diesel industrial static
	EIOU	Charcoal production plants (ECHARCOAL)	Gasoline type jet fuel	Diesel industrial static
	EIOU	Charcoal production plants (ECHARCOAL)	Kerosene type jet fuel excl. biofuels	Diesel industrial static
	EIOU	Charcoal production plants (ECHARCOAL)	Other kerosene	Water heat
	EIOU	Charcoal production plants (ECHARCOAL)	Gas/diesel oil excl. biofuels	Diesel industrial static
	EIOU	Charcoal production plants (ECHARCOAL)	Fuel oil	MT industrial heat
	EIOU	Charcoal production plants (ECHARCOAL)	Naphtha	Diesel industrial static
	EIOU	Charcoal production plants (ECHARCOAL)	White spirit & SBP	Diesel industrial static
	EIOU	Charcoal production plants (ECHARCOAL)	Lubricants	Diesel industrial static
	EIOU	Charcoal production plants (ECHARCOAL)	Bitumen	Diesel industrial static
	EIOU	Charcoal production plants (ECHARCOAL)	Paraffin waxes	Water heat
	EIOU	Charcoal production plants (ECHARCOAL)	Petroleum coke	MT industrial heat
	EIOU	Charcoal production plants (ECHARCOAL)	Other oil products	MT industrial heat
	EIOU	Charcoal production plants (ECHARCOAL)	Heat output from non-specified combustible fuels	Water heat
	EIOU	Charcoal production plants (ECHARCOAL)	Nuclear	No allocation
	EIOU	Charcoal production plants (ECHARCOAL)	Hydro	No allocation
	EIOU	Charcoal production plants (ECHARCOAL)	Geothermal	Water heat
	EIOU	Charcoal production plants (ECHARCOAL)	Solar photovoltaics	No allocation
	EIOU	Charcoal production plants (ECHARCOAL)	Solar thermal	Space heat
	EIOU	Charcoal production plants (ECHARCOAL)	Tide, wave and ocean	No allocation
	EIOU	Charcoal production plants (ECHARCOAL)	Wind	No allocation
	EIOU	Charcoal production plants (ECHARCOAL)	Other sources	Water heat
	EIOU	Charcoal production plants (ECHARCOAL)	Electricity	Electricity: Industry
	EIOU	Charcoal production plants (ECHARCOAL)	Heat	Water heat
	EIOU	Charcoal production plants (ECHARCOAL)	Oil shale and oil sands	No allocation
	EIOU	Charcoal production plants (ECHARCOAL)	Peat products	MT industrial heat
	EIOU	Charcoal production plants (ECHARCOAL)
	EIOU	Non-specified (energy)	Hard coal (if no detail)	MT industrial heat
	EIOU	Non-specified (energy)	Brown coal (if no detail)	MT industrial heat
	EIOU	Non-specified (energy)	Anthracite	MT industrial heat
	EIOU	Non-specified (energy)	Coking coal	MT industrial heat
	EIOU	Non-specified (energy)	Other bituminous coal	MT industrial heat
	EIOU	Non-specified (energy)	Sub-bituminous coal	MT industrial heat
	EIOU	Non-specified (energy)	Lignite	MT industrial heat
	EIOU	Non-specified (energy)	Peat	MT industrial heat
	EIOU	Non-specified (energy)	Patent fuel	MT industrial heat
	EIOU	Non-specified (energy)	Coke oven coke	HTH industrial heat
	EIOU	Non-specified (energy)	Gas coke	HTH industrial heat
	EIOU	Non-specified (energy)	Coal tar	MT industrial heat
	EIOU	Non-specified (energy)	BKB	MT industrial heat
	EIOU	Non-specified (energy)	Gas works gas	HTH industrial heat
	EIOU	Non-specified (energy)	Coke oven gas	HTH industrial heat
	EIOU	Non-specified (energy)	Blast furnace gas	HTH industrial heat
	EIOU	Non-specified (energy)	Other recovered gases	HTH industrial heat
	EIOU	Non-specified (energy)	Elec/heat output from non-specified manufactured gases	MT industrial heat
	EIOU	Non-specified (energy)	Industrial waste	MT industrial heat
	EIOU	Non-specified (energy)	Municipal waste (renewable)	MT industrial heat
	EIOU	Non-specified (energy)	Municipal waste (non-renewable)	MT industrial heat
	EIOU	Non-specified (energy)	Primary solid biofuels	MT industrial heat
	EIOU	Non-specified (energy)	Biogases	MT industrial heat
	EIOU	Non-specified (energy)	Biogasoline	Diesel industrial static
	EIOU	Non-specified (energy)	Biodiesels	Diesel industrial static
	EIOU	Non-specified (energy)	Other liquid biofuels	Diesel industrial static
	EIOU	Non-specified (energy)	Non-specified primary biofuels and waste	MT industrial heat
	EIOU	Non-specified (energy)	Charcoal	Water heat
	EIOU	Non-specified (energy)	Natural gas	MT industrial heat
	EIOU	Non-specified (energy)	Crude/NGL/feedstocks (if no detail)	MT industrial heat
	EIOU	Non-specified (energy)	Crude oil	MT industrial heat
	EIOU	Non-specified (energy)	Natural gas liquids	MT industrial heat
	EIOU	Non-specified (energy)	Refinery feedstocks	MT industrial heat
	EIOU	Non-specified (energy)	Additives/blending components	MT industrial heat
	EIOU	Non-specified (energy)	Other hydrocarbons	MT industrial heat
	EIOU	Non-specified (energy)	Refinery gas	MT industrial heat
	EIOU	Non-specified (energy)	Ethane	Water heat
	EIOU	Non-specified (energy)	Liquefied petroleum gases (LPG)	Diesel industrial static
	EIOU	Non-specified (energy)	Motor gasoline excl. biofuels	Diesel industrial static
	EIOU	Non-specified (energy)	Aviation gasoline	Diesel industrial static
	EIOU	Non-specified (energy)	Gasoline type jet fuel	Diesel industrial static
	EIOU	Non-specified (energy)	Kerosene type jet fuel excl. biofuels	Diesel industrial static
	EIOU	Non-specified (energy)	Other kerosene	Water heat
	EIOU	Non-specified (energy)	Gas/diesel oil excl. biofuels	Diesel industrial static
	EIOU	Non-specified (energy)	Fuel oil	MT industrial heat
	EIOU	Non-specified (energy)	Naphtha	Diesel industrial static
	EIOU	Non-specified (energy)	White spirit & SBP	Diesel industrial static
	EIOU	Non-specified (energy)	Lubricants	Diesel industrial static
	EIOU	Non-specified (energy)	Bitumen	Diesel industrial static
	EIOU	Non-specified (energy)	Paraffin waxes	Water heat
	EIOU	Non-specified (energy)	Petroleum coke	MT industrial heat
	EIOU	Non-specified (energy)	Other oil products	MT industrial heat
	EIOU	Non-specified (energy)	Heat output from non-specified combustible fuels	Water heat
	EIOU	Non-specified (energy)	Nuclear	No allocation
	EIOU	Non-specified (energy)	Hydro	No allocation
	EIOU	Non-specified (energy)	Geothermal	Water heat
	EIOU	Non-specified (energy)	Solar photovoltaics	No allocation
	EIOU	Non-specified (energy)	Solar thermal	Space heat
	EIOU	Non-specified (energy)	Tide, wave and ocean	No allocation
	EIOU	Non-specified (energy)	Wind	No allocation
	EIOU	Non-specified (energy)	Other sources	Water heat
	EIOU	Non-specified (energy)	Electricity	Electricity: Industry
	EIOU	Non-specified (energy)	Heat	Water heat
	EIOU	Non-specified (energy)	Oil shale and oil sands	No allocation
	EIOU	Non-specified (energy)	Peat products	MT industrial heat
	EIOU	Non-specified (energy)
	Industry	Iron and steel	Hard coal (if no detail)	Industry heat
	Industry	Iron and steel	Brown coal (if no detail)	Industry heat
	Industry	Iron and steel	Anthracite	Industry heat
	Industry	Iron and steel	Coking coal	Industry heat
	Industry	Iron and steel	Other bituminous coal	Industry heat
	Industry	Iron and steel	Sub-bituminous coal	Industry heat
	Industry	Iron and steel	Lignite	Industry heat
	Industry	Iron and steel	Peat	Industry heat
	Industry	Iron and steel	Patent fuel	Industry heat
	Industry	Iron and steel	Coke oven coke	Industry heat
	Industry	Iron and steel	Gas coke	Industry heat
	Industry	Iron and steel	Coal tar	Industry heat
	Industry	Iron and steel	BKB	Industry heat
	Industry	Iron and steel	Gas works gas	Industry heat
	Industry	Iron and steel	Coke oven gas	Industry heat
	Industry	Iron and steel	Blast furnace gas	Industry heat
	Industry	Iron and steel	Other recovered gases	Industry heat
	Industry	Iron and steel	Elec/heat output from non-specified manufactured gases	Industry heat
	Industry	Iron and steel	Industrial waste	Industry heat
	Industry	Iron and steel	Municipal waste (renewable)	Industry heat
	Industry	Iron and steel	Municipal waste (non-renewable)	Industry heat
	Industry	Iron and steel	Primary solid biofuels	Industry heat
	Industry	Iron and steel	Biogases	Industry heat
	Industry	Iron and steel	Biogasoline	Diesel industrial static
	Industry	Iron and steel	Biodiesels	Diesel industrial static
	Industry	Iron and steel	Other liquid biofuels	Diesel industrial static
	Industry	Iron and steel	Non-specified primary biofuels and waste	Industry heat
	Industry	Iron and steel	Charcoal	Industry heat
	Industry	Iron and steel	Natural gas	Industry heat
	Industry	Iron and steel	Crude/NGL/feedstocks (if no detail)	Industry heat
	Industry	Iron and steel	Crude oil	Industry heat
	Industry	Iron and steel	Natural gas liquids	Industry heat
	Industry	Iron and steel	Refinery feedstocks	Industry heat
	Industry	Iron and steel	Additives/blending components	Industry heat
	Industry	Iron and steel	Other hydrocarbons	Industry heat
	Industry	Iron and steel	Refinery gas	Industry heat
	Industry	Iron and steel	Ethane	Industry heat
	Industry	Iron and steel	Liquefied petroleum gases (LPG)	Industry heat
	Industry	Iron and steel	Motor gasoline excl. biofuels	Diesel industrial static
	Industry	Iron and steel	Aviation gasoline	Diesel industrial static
	Industry	Iron and steel	Gasoline type jet fuel	Diesel industrial static
	Industry	Iron and steel	Kerosene type jet fuel excl. biofuels	Diesel industrial static
	Industry	Iron and steel	Other kerosene	Industry heat
	Industry	Iron and steel	Gas/diesel oil excl. biofuels	Diesel industrial static
	Industry	Iron and steel	Fuel oil	Industry heat
	Industry	Iron and steel	Naphtha	Industry heat
	Industry	Iron and steel	White spirit & SBP	Industry heat
	Industry	Iron and steel	Lubricants	Industry heat
	Industry	Iron and steel	Bitumen	Industry heat
	Industry	Iron and steel	Paraffin waxes	Industry heat
	Industry	Iron and steel	Petroleum coke	Industry heat
	Industry	Iron and steel	Other oil products	Industry heat
	Industry	Iron and steel	Heat output from non-specified combustible fuels	Industry heat
	Industry	Iron and steel	Nuclear	No allocation
	Industry	Iron and steel	Hydro	No allocation
	Industry	Iron and steel	Geothermal	Industry heat
	Industry	Iron and steel	Solar photovoltaics	No allocation
	Industry	Iron and steel	Solar thermal	Industry heat
	Industry	Iron and steel	Tide, wave and ocean	No allocation
	Industry	Iron and steel	Wind	No allocation
	Industry	Iron and steel	Other sources	No allocation
	Industry	Iron and steel	Electricity	Electricity: Industry
	Industry	Iron and steel	Heat	Industry heat
	Industry	Iron and steel	Oil shale and oil sands	Industry heat
	Industry	Iron and steel	Peat products	Industry heat
	Industry	Iron and steel
	Industry	Chemical and petrochemical	Hard coal (if no detail)	Industry heat
	Industry	Chemical and petrochemical	Brown coal (if no detail)	Industry heat
	Industry	Chemical and petrochemical	Anthracite	Industry heat
	Industry	Chemical and petrochemical	Coking coal	Industry heat
	Industry	Chemical and petrochemical	Other bituminous coal	Industry heat
	Industry	Chemical and petrochemical	Sub-bituminous coal	Industry heat
	Industry	Chemical and petrochemical	Lignite	Industry heat
	Industry	Chemical and petrochemical	Peat	Industry heat
	Industry	Chemical and petrochemical	Patent fuel	Industry heat
	Industry	Chemical and petrochemical	Coke oven coke	Industry heat
	Industry	Chemical and petrochemical	Gas coke	Industry heat
	Industry	Chemical and petrochemical	Coal tar	Industry heat
	Industry	Chemical and petrochemical	BKB	Industry heat
	Industry	Chemical and petrochemical	Gas works gas	Industry heat
	Industry	Chemical and petrochemical	Coke oven gas	Industry heat
	Industry	Chemical and petrochemical	Blast furnace gas	Industry heat
	Industry	Chemical and petrochemical	Other recovered gases	Industry heat
	Industry	Chemical and petrochemical	Elec/heat output from non-specified manufactured gases	Industry heat
	Industry	Chemical and petrochemical	Industrial waste	Industry heat
	Industry	Chemical and petrochemical	Municipal waste (renewable)	Industry heat
	Industry	Chemical and petrochemical	Municipal waste (non-renewable)	Industry heat
	Industry	Chemical and petrochemical	Primary solid biofuels	Industry heat
	Industry	Chemical and petrochemical	Biogases	Industry heat
	Industry	Chemical and petrochemical	Biogasoline	Diesel industrial static
	Industry	Chemical and petrochemical	Biodiesels	Diesel industrial static
	Industry	Chemical and petrochemical	Other liquid biofuels	Diesel industrial static
	Industry	Chemical and petrochemical	Non-specified primary biofuels and waste	Industry heat
	Industry	Chemical and petrochemical	Charcoal	Industry heat
	Industry	Chemical and petrochemical	Natural gas	Industry heat
	Industry	Chemical and petrochemical	Crude/NGL/feedstocks (if no detail)	Industry heat
	Industry	Chemical and petrochemical	Crude oil	Industry heat
	Industry	Chemical and petrochemical	Natural gas liquids	Industry heat
	Industry	Chemical and petrochemical	Refinery feedstocks	Industry heat
	Industry	Chemical and petrochemical	Additives/blending components	Industry heat
	Industry	Chemical and petrochemical	Other hydrocarbons	Industry heat
	Industry	Chemical and petrochemical	Refinery gas	Industry heat
	Industry	Chemical and petrochemical	Ethane	Industry heat
	Industry	Chemical and petrochemical	Liquefied petroleum gases (LPG)	Industry heat
	Industry	Chemical and petrochemical	Motor gasoline excl. biofuels	Diesel industrial static
	Industry	Chemical and petrochemical	Aviation gasoline	Diesel industrial static
	Industry	Chemical and petrochemical	Gasoline type jet fuel	Diesel industrial static
	Industry	Chemical and petrochemical	Kerosene type jet fuel excl. biofuels	Diesel industrial static
	Industry	Chemical and petrochemical	Other kerosene	Industry heat
	Industry	Chemical and petrochemical	Gas/diesel oil excl. biofuels	Diesel industrial static
	Industry	Chemical and petrochemical	Fuel oil	Industry heat
	Industry	Chemical and petrochemical	Naphtha	Industry heat
	Industry	Chemical and petrochemical	White spirit & SBP	Industry heat
	Industry	Chemical and petrochemical	Lubricants	Industry heat
	Industry	Chemical and petrochemical	Bitumen	Industry heat
	Industry	Chemical and petrochemical	Paraffin waxes	Industry heat
	Industry	Chemical and petrochemical	Petroleum coke	Industry heat
	Industry	Chemical and petrochemical	Other oil products	Industry heat
	Industry	Chemical and petrochemical	Heat output from non-specified combustible fuels	Industry heat
	Industry	Chemical and petrochemical	Nuclear	No allocation
	Industry	Chemical and petrochemical	Hydro	No allocation
	Industry	Chemical and petrochemical	Geothermal	Industry heat
	Industry	Chemical and petrochemical	Solar photovoltaics	No allocation
	Industry	Chemical and petrochemical	Solar thermal	Industry heat
	Industry	Chemical and petrochemical	Tide, wave and ocean	No allocation
	Industry	Chemical and petrochemical	Wind	No allocation
	Industry	Chemical and petrochemical	Other sources	No allocation
	Industry	Chemical and petrochemical	Electricity	Electricity: Industry
	Industry	Chemical and petrochemical	Heat	Industry heat
	Industry	Chemical and petrochemical	Oil shale and oil sands	Industry heat
	Industry	Chemical and petrochemical	Peat products	Industry heat
	Industry	Chemical and petrochemical
	Industry	Non-ferrous metals	Hard coal (if no detail)	Industry heat
	Industry	Non-ferrous metals	Brown coal (if no detail)	Industry heat
	Industry	Non-ferrous metals	Anthracite	Industry heat
	Industry	Non-ferrous metals	Coking coal	Industry heat
	Industry	Non-ferrous metals	Other bituminous coal	Industry heat
	Industry	Non-ferrous metals	Sub-bituminous coal	Industry heat
	Industry	Non-ferrous metals	Lignite	Industry heat
	Industry	Non-ferrous metals	Peat	Industry heat
	Industry	Non-ferrous metals	Patent fuel	Industry heat
	Industry	Non-ferrous metals	Coke oven coke	Industry heat
	Industry	Non-ferrous metals	Gas coke	Industry heat
	Industry	Non-ferrous metals	Coal tar	Industry heat
	Industry	Non-ferrous metals	BKB	Industry heat
	Industry	Non-ferrous metals	Gas works gas	Industry heat
	Industry	Non-ferrous metals	Coke oven gas	Industry heat
	Industry	Non-ferrous metals	Blast furnace gas	Industry heat
	Industry	Non-ferrous metals	Other recovered gases	Industry heat
	Industry	Non-ferrous metals	Elec/heat output from non-specified manufactured gases	Industry heat
	Industry	Non-ferrous metals	Industrial waste	Industry heat
	Industry	Non-ferrous metals	Municipal waste (renewable)	Industry heat
	Industry	Non-ferrous metals	Municipal waste (non-renewable)	Industry heat
	Industry	Non-ferrous metals	Primary solid biofuels	Industry heat
	Industry	Non-ferrous metals	Biogases	Industry heat
	Industry	Non-ferrous metals	Biogasoline	Diesel industrial static
	Industry	Non-ferrous metals	Biodiesels	Diesel industrial static
	Industry	Non-ferrous metals	Other liquid biofuels	Diesel industrial static
	Industry	Non-ferrous metals	Non-specified primary biofuels and waste	Industry heat
	Industry	Non-ferrous metals	Charcoal	Industry heat
	Industry	Non-ferrous metals	Natural gas	Industry heat
	Industry	Non-ferrous metals	Crude/NGL/feedstocks (if no detail)	Industry heat
	Industry	Non-ferrous metals	Crude oil	Industry heat
	Industry	Non-ferrous metals	Natural gas liquids	Industry heat
	Industry	Non-ferrous metals	Refinery feedstocks	Industry heat
	Industry	Non-ferrous metals	Additives/blending components	Industry heat
	Industry	Non-ferrous metals	Other hydrocarbons	Industry heat
	Industry	Non-ferrous metals	Refinery gas	Industry heat
	Industry	Non-ferrous metals	Ethane	Industry heat
	Industry	Non-ferrous metals	Liquefied petroleum gases (LPG)	Industry heat
	Industry	Non-ferrous metals	Motor gasoline excl. biofuels	Diesel industrial static
	Industry	Non-ferrous metals	Aviation gasoline	Diesel industrial static
	Industry	Non-ferrous metals	Gasoline type jet fuel	Diesel industrial static
	Industry	Non-ferrous metals	Kerosene type jet fuel excl. biofuels	Diesel industrial static
	Industry	Non-ferrous metals	Other kerosene	Industry heat
	Industry	Non-ferrous metals	Gas/diesel oil excl. biofuels	Diesel industrial static
	Industry	Non-ferrous metals	Fuel oil	Industry heat
	Industry	Non-ferrous metals	Naphtha	Industry heat
	Industry	Non-ferrous metals	White spirit & SBP	Industry heat
	Industry	Non-ferrous metals	Lubricants	Industry heat
	Industry	Non-ferrous metals	Bitumen	Industry heat
	Industry	Non-ferrous metals	Paraffin waxes	Industry heat
	Industry	Non-ferrous metals	Petroleum coke	Industry heat
	Industry	Non-ferrous metals	Other oil products	Industry heat
	Industry	Non-ferrous metals	Heat output from non-specified combustible fuels	Industry heat
	Industry	Non-ferrous metals	Nuclear	No allocation
	Industry	Non-ferrous metals	Hydro	No allocation
	Industry	Non-ferrous metals	Geothermal	Industry heat
	Industry	Non-ferrous metals	Solar photovoltaics	No allocation
	Industry	Non-ferrous metals	Solar thermal	Industry heat
	Industry	Non-ferrous metals	Tide, wave and ocean	No allocation
	Industry	Non-ferrous metals	Wind	No allocation
	Industry	Non-ferrous metals	Other sources	No allocation
	Industry	Non-ferrous metals	Electricity	Electricity: Industry
	Industry	Non-ferrous metals	Heat	Industry heat
	Industry	Non-ferrous metals	Oil shale and oil sands	Industry heat
	Industry	Non-ferrous metals	Peat products	Industry heat
	Industry	Non-ferrous metals
	Industry	Non-metallic minerals	Hard coal (if no detail)	Industry heat
	Industry	Non-metallic minerals	Brown coal (if no detail)	Industry heat
	Industry	Non-metallic minerals	Anthracite	Industry heat
	Industry	Non-metallic minerals	Coking coal	Industry heat
	Industry	Non-metallic minerals	Other bituminous coal	Industry heat
	Industry	Non-metallic minerals	Sub-bituminous coal	Industry heat
	Industry	Non-metallic minerals	Lignite	Industry heat
	Industry	Non-metallic minerals	Peat	Industry heat
	Industry	Non-metallic minerals	Patent fuel	Industry heat
	Industry	Non-metallic minerals	Coke oven coke	Industry heat
	Industry	Non-metallic minerals	Gas coke	Industry heat
	Industry	Non-metallic minerals	Coal tar	Industry heat
	Industry	Non-metallic minerals	BKB	Industry heat
	Industry	Non-metallic minerals	Gas works gas	Industry heat
	Industry	Non-metallic minerals	Coke oven gas	Industry heat
	Industry	Non-metallic minerals	Blast furnace gas	Industry heat
	Industry	Non-metallic minerals	Other recovered gases	Industry heat
	Industry	Non-metallic minerals	Elec/heat output from non-specified manufactured gases	Industry heat
	Industry	Non-metallic minerals	Industrial waste	Industry heat
	Industry	Non-metallic minerals	Municipal waste (renewable)	Industry heat
	Industry	Non-metallic minerals	Municipal waste (non-renewable)	Industry heat
	Industry	Non-metallic minerals	Primary solid biofuels	Industry heat
	Industry	Non-metallic minerals	Biogases	Industry heat
	Industry	Non-metallic minerals	Biogasoline	Diesel industrial static
	Industry	Non-metallic minerals	Biodiesels	Diesel industrial static
	Industry	Non-metallic minerals	Other liquid biofuels	Diesel industrial static
	Industry	Non-metallic minerals	Non-specified primary biofuels and waste	Industry heat
	Industry	Non-metallic minerals	Charcoal	Industry heat
	Industry	Non-metallic minerals	Natural gas	Industry heat
	Industry	Non-metallic minerals	Crude/NGL/feedstocks (if no detail)	Industry heat
	Industry	Non-metallic minerals	Crude oil	Industry heat
	Industry	Non-metallic minerals	Natural gas liquids	Industry heat
	Industry	Non-metallic minerals	Refinery feedstocks	Industry heat
	Industry	Non-metallic minerals	Additives/blending components	Industry heat
	Industry	Non-metallic minerals	Other hydrocarbons	Industry heat
	Industry	Non-metallic minerals	Refinery gas	Industry heat
	Industry	Non-metallic minerals	Ethane	Industry heat
	Industry	Non-metallic minerals	Liquefied petroleum gases (LPG)	Industry heat
	Industry	Non-metallic minerals	Motor gasoline excl. biofuels	Diesel industrial static
	Industry	Non-metallic minerals	Aviation gasoline	Diesel industrial static
	Industry	Non-metallic minerals	Gasoline type jet fuel	Diesel industrial static
	Industry	Non-metallic minerals	Kerosene type jet fuel excl. biofuels	Diesel industrial static
	Industry	Non-metallic minerals	Other kerosene	Industry heat
	Industry	Non-metallic minerals	Gas/diesel oil excl. biofuels	Diesel industrial static
	Industry	Non-metallic minerals	Fuel oil	Industry heat
	Industry	Non-metallic minerals	Naphtha	Industry heat
	Industry	Non-metallic minerals	White spirit & SBP	Industry heat
	Industry	Non-metallic minerals	Lubricants	Industry heat
	Industry	Non-metallic minerals	Bitumen	Industry heat
	Industry	Non-metallic minerals	Paraffin waxes	Industry heat
	Industry	Non-metallic minerals	Petroleum coke	Industry heat
	Industry	Non-metallic minerals	Other oil products	Industry heat
	Industry	Non-metallic minerals	Heat output from non-specified combustible fuels	Industry heat
	Industry	Non-metallic minerals	Nuclear	No allocation
	Industry	Non-metallic minerals	Hydro	No allocation
	Industry	Non-metallic minerals	Geothermal	Industry heat
	Industry	Non-metallic minerals	Solar photovoltaics	No allocation
	Industry	Non-metallic minerals	Solar thermal	Industry heat
	Industry	Non-metallic minerals	Tide, wave and ocean	No allocation
	Industry	Non-metallic minerals	Wind	No allocation
	Industry	Non-metallic minerals	Other sources	No allocation
	Industry	Non-metallic minerals	Electricity	Electricity: Industry
	Industry	Non-metallic minerals	Heat	Industry heat
	Industry	Non-metallic minerals	Oil shale and oil sands	Industry heat
	Industry	Non-metallic minerals	Peat products	Industry heat
	Industry	Non-metallic minerals
	Industry	Transport equipment	Hard coal (if no detail)	Industry heat
	Industry	Transport equipment	Brown coal (if no detail)	Industry heat
	Industry	Transport equipment	Anthracite	Industry heat
	Industry	Transport equipment	Coking coal	Industry heat
	Industry	Transport equipment	Other bituminous coal	Industry heat
	Industry	Transport equipment	Sub-bituminous coal	Industry heat
	Industry	Transport equipment	Lignite	Industry heat
	Industry	Transport equipment	Peat	Industry heat
	Industry	Transport equipment	Patent fuel	Industry heat
	Industry	Transport equipment	Coke oven coke	Industry heat
	Industry	Transport equipment	Gas coke	Industry heat
	Industry	Transport equipment	Coal tar	Industry heat
	Industry	Transport equipment	BKB	Industry heat
	Industry	Transport equipment	Gas works gas	Industry heat
	Industry	Transport equipment	Coke oven gas	Industry heat
	Industry	Transport equipment	Blast furnace gas	Industry heat
	Industry	Transport equipment	Other recovered gases	Industry heat
	Industry	Transport equipment	Elec/heat output from non-specified manufactured gases	Industry heat
	Industry	Transport equipment	Industrial waste	Industry heat
	Industry	Transport equipment	Municipal waste (renewable)	Industry heat
	Industry	Transport equipment	Municipal waste (non-renewable)	Industry heat
	Industry	Transport equipment	Primary solid biofuels	Industry heat
	Industry	Transport equipment	Biogases	Industry heat
	Industry	Transport equipment	Biogasoline	Diesel industrial static
	Industry	Transport equipment	Biodiesels	Diesel industrial static
	Industry	Transport equipment	Other liquid biofuels	Diesel industrial static
	Industry	Transport equipment	Non-specified primary biofuels and waste	Industry heat
	Industry	Transport equipment	Charcoal	Industry heat
	Industry	Transport equipment	Natural gas	Industry heat
	Industry	Transport equipment	Crude/NGL/feedstocks (if no detail)	Industry heat
	Industry	Transport equipment	Crude oil	Industry heat
	Industry	Transport equipment	Natural gas liquids	Industry heat
	Industry	Transport equipment	Refinery feedstocks	Industry heat
	Industry	Transport equipment	Additives/blending components	Industry heat
	Industry	Transport equipment	Other hydrocarbons	Industry heat
	Industry	Transport equipment	Refinery gas	Industry heat
	Industry	Transport equipment	Ethane	Industry heat
	Industry	Transport equipment	Liquefied petroleum gases (LPG)	Industry heat
	Industry	Transport equipment	Motor gasoline excl. biofuels	Diesel industrial static
	Industry	Transport equipment	Aviation gasoline	Diesel industrial static
	Industry	Transport equipment	Gasoline type jet fuel	Diesel industrial static
	Industry	Transport equipment	Kerosene type jet fuel excl. biofuels	Diesel industrial static
	Industry	Transport equipment	Other kerosene	Industry heat
	Industry	Transport equipment	Gas/diesel oil excl. biofuels	Diesel industrial static
	Industry	Transport equipment	Fuel oil	Industry heat
	Industry	Transport equipment	Naphtha	Industry heat
	Industry	Transport equipment	White spirit & SBP	Industry heat
	Industry	Transport equipment	Lubricants	Industry heat
	Industry	Transport equipment	Bitumen	Industry heat
	Industry	Transport equipment	Paraffin waxes	Industry heat
	Industry	Transport equipment	Petroleum coke	Industry heat
	Industry	Transport equipment	Other oil products	Industry heat
	Industry	Transport equipment	Heat output from non-specified combustible fuels	Industry heat
	Industry	Transport equipment	Nuclear	No allocation
	Industry	Transport equipment	Hydro	No allocation
	Industry	Transport equipment	Geothermal	Industry heat
	Industry	Transport equipment	Solar photovoltaics	No allocation
	Industry	Transport equipment	Solar thermal	Industry heat
	Industry	Transport equipment	Tide, wave and ocean	No allocation
	Industry	Transport equipment	Wind	No allocation
	Industry	Transport equipment	Other sources	No allocation
	Industry	Transport equipment	Electricity	Electricity: Industry
	Industry	Transport equipment	Heat	Industry heat
	Industry	Transport equipment	Oil shale and oil sands	Industry heat
	Industry	Transport equipment	Peat products	Industry heat
	Industry	Transport equipment
	Industry	Machinery	Hard coal (if no detail)	Industry heat
	Industry	Machinery	Brown coal (if no detail)	Industry heat
	Industry	Machinery	Anthracite	Industry heat
	Industry	Machinery	Coking coal	Industry heat
	Industry	Machinery	Other bituminous coal	Industry heat
	Industry	Machinery	Sub-bituminous coal	Industry heat
	Industry	Machinery	Lignite	Industry heat
	Industry	Machinery	Peat	Industry heat
	Industry	Machinery	Patent fuel	Industry heat
	Industry	Machinery	Coke oven coke	Industry heat
	Industry	Machinery	Gas coke	Industry heat
	Industry	Machinery	Coal tar	Industry heat
	Industry	Machinery	BKB	Industry heat
	Industry	Machinery	Gas works gas	Industry heat
	Industry	Machinery	Coke oven gas	Industry heat
	Industry	Machinery	Blast furnace gas	Industry heat
	Industry	Machinery	Other recovered gases	Industry heat
	Industry	Machinery	Elec/heat output from non-specified manufactured gases	Industry heat
	Industry	Machinery	Industrial waste	Industry heat
	Industry	Machinery	Municipal waste (renewable)	Industry heat
	Industry	Machinery	Municipal waste (non-renewable)	Industry heat
	Industry	Machinery	Primary solid biofuels	Industry heat
	Industry	Machinery	Biogases	Industry heat
	Industry	Machinery	Biogasoline	Diesel industrial static
	Industry	Machinery	Biodiesels	Diesel industrial static
	Industry	Machinery	Other liquid biofuels	Diesel industrial static
	Industry	Machinery	Non-specified primary biofuels and waste	Industry heat
	Industry	Machinery	Charcoal	Industry heat
	Industry	Machinery	Natural gas	Industry heat
	Industry	Machinery	Crude/NGL/feedstocks (if no detail)	Industry heat
	Industry	Machinery	Crude oil	Industry heat
	Industry	Machinery	Natural gas liquids	Industry heat
	Industry	Machinery	Refinery feedstocks	Industry heat
	Industry	Machinery	Additives/blending components	Industry heat
	Industry	Machinery	Other hydrocarbons	Industry heat
	Industry	Machinery	Refinery gas	Industry heat
	Industry	Machinery	Ethane	Industry heat
	Industry	Machinery	Liquefied petroleum gases (LPG)	Industry heat
	Industry	Machinery	Motor gasoline excl. biofuels	Diesel industrial static
	Industry	Machinery	Aviation gasoline	Diesel industrial static
	Industry	Machinery	Gasoline type jet fuel	Diesel industrial static
	Industry	Machinery	Kerosene type jet fuel excl. biofuels	Diesel industrial static
	Industry	Machinery	Other kerosene	Industry heat
	Industry	Machinery	Gas/diesel oil excl. biofuels	Diesel industrial static
	Industry	Machinery	Fuel oil	Industry heat
	Industry	Machinery	Naphtha	Industry heat
	Industry	Machinery	White spirit & SBP	Industry heat
	Industry	Machinery	Lubricants	Industry heat
	Industry	Machinery	Bitumen	Industry heat
	Industry	Machinery	Paraffin waxes	Industry heat
	Industry	Machinery	Petroleum coke	Industry heat
	Industry	Machinery	Other oil products	Industry heat
	Industry	Machinery	Heat output from non-specified combustible fuels	Industry heat
	Industry	Machinery	Nuclear	No allocation
	Industry	Machinery	Hydro	No allocation
	Industry	Machinery	Geothermal	Industry heat
	Industry	Machinery	Solar photovoltaics	No allocation
	Industry	Machinery	Solar thermal	Industry heat
	Industry	Machinery	Tide, wave and ocean	No allocation
	Industry	Machinery	Wind	No allocation
	Industry	Machinery	Other sources	No allocation
	Industry	Machinery	Electricity	Electricity: Industry
	Industry	Machinery	Heat	Industry heat
	Industry	Machinery	Oil shale and oil sands	Industry heat
	Industry	Machinery	Peat products	Industry heat
	Industry	Machinery
	Industry	Mining and quarrying	Hard coal (if no detail)	Industry heat
	Industry	Mining and quarrying	Brown coal (if no detail)	Industry heat
	Industry	Mining and quarrying	Anthracite	Industry heat
	Industry	Mining and quarrying	Coking coal	Industry heat
	Industry	Mining and quarrying	Other bituminous coal	Industry heat
	Industry	Mining and quarrying	Sub-bituminous coal	Industry heat
	Industry	Mining and quarrying	Lignite	Industry heat
	Industry	Mining and quarrying	Peat	Industry heat
	Industry	Mining and quarrying	Patent fuel	Industry heat
	Industry	Mining and quarrying	Coke oven coke	Industry heat
	Industry	Mining and quarrying	Gas coke	Industry heat
	Industry	Mining and quarrying	Coal tar	Industry heat
	Industry	Mining and quarrying	BKB	Industry heat
	Industry	Mining and quarrying	Gas works gas	Industry heat
	Industry	Mining and quarrying	Coke oven gas	Industry heat
	Industry	Mining and quarrying	Blast furnace gas	Industry heat
	Industry	Mining and quarrying	Other recovered gases	Industry heat
	Industry	Mining and quarrying	Elec/heat output from non-specified manufactured gases	Industry heat
	Industry	Mining and quarrying	Industrial waste	Industry heat
	Industry	Mining and quarrying	Municipal waste (renewable)	Industry heat
	Industry	Mining and quarrying	Municipal waste (non-renewable)	Industry heat
	Industry	Mining and quarrying	Primary solid biofuels	Industry heat
	Industry	Mining and quarrying	Biogases	Industry heat
	Industry	Mining and quarrying	Biogasoline	Diesel industrial static
	Industry	Mining and quarrying	Biodiesels	Diesel industrial static
	Industry	Mining and quarrying	Other liquid biofuels	Diesel industrial static
	Industry	Mining and quarrying	Non-specified primary biofuels and waste	Industry heat
	Industry	Mining and quarrying	Charcoal	Industry heat
	Industry	Mining and quarrying	Natural gas	Industry heat
	Industry	Mining and quarrying	Crude/NGL/feedstocks (if no detail)	Industry heat
	Industry	Mining and quarrying	Crude oil	Industry heat
	Industry	Mining and quarrying	Natural gas liquids	Industry heat
	Industry	Mining and quarrying	Refinery feedstocks	Industry heat
	Industry	Mining and quarrying	Additives/blending components	Industry heat
	Industry	Mining and quarrying	Other hydrocarbons	Industry heat
	Industry	Mining and quarrying	Refinery gas	Industry heat
	Industry	Mining and quarrying	Ethane	Industry heat
	Industry	Mining and quarrying	Liquefied petroleum gases (LPG)	Industry heat
	Industry	Mining and quarrying	Motor gasoline excl. biofuels	Diesel industrial static
	Industry	Mining and quarrying	Aviation gasoline	Diesel industrial static
	Industry	Mining and quarrying	Gasoline type jet fuel	Diesel industrial static
	Industry	Mining and quarrying	Kerosene type jet fuel excl. biofuels	Diesel industrial static
	Industry	Mining and quarrying	Other kerosene	Industry heat
	Industry	Mining and quarrying	Gas/diesel oil excl. biofuels	Diesel industrial static
	Industry	Mining and quarrying	Fuel oil	Industry heat
	Industry	Mining and quarrying	Naphtha	Industry heat
	Industry	Mining and quarrying	White spirit & SBP	Industry heat
	Industry	Mining and quarrying	Lubricants	Industry heat
	Industry	Mining and quarrying	Bitumen	Industry heat
	Industry	Mining and quarrying	Paraffin waxes	Industry heat
	Industry	Mining and quarrying	Petroleum coke	Industry heat
	Industry	Mining and quarrying	Other oil products	Industry heat
	Industry	Mining and quarrying	Heat output from non-specified combustible fuels	Industry heat
	Industry	Mining and quarrying	Nuclear	No allocation
	Industry	Mining and quarrying	Hydro	No allocation
	Industry	Mining and quarrying	Geothermal	Industry heat
	Industry	Mining and quarrying	Solar photovoltaics	No allocation
	Industry	Mining and quarrying	Solar thermal	Industry heat
	Industry	Mining and quarrying	Tide, wave and ocean	No allocation
	Industry	Mining and quarrying	Wind	No allocation
	Industry	Mining and quarrying	Other sources	No allocation
	Industry	Mining and quarrying	Electricity	Electricity: Industry
	Industry	Mining and quarrying	Heat	Industry heat
	Industry	Mining and quarrying	Oil shale and oil sands	Industry heat
	Industry	Mining and quarrying	Peat products	Industry heat
	Industry	Mining and quarrying
	Industry	Food and tobacco	Hard coal (if no detail)	Industry heat
	Industry	Food and tobacco	Brown coal (if no detail)	Industry heat
	Industry	Food and tobacco	Anthracite	Industry heat
	Industry	Food and tobacco	Coking coal	Industry heat
	Industry	Food and tobacco	Other bituminous coal	Industry heat
	Industry	Food and tobacco	Sub-bituminous coal	Industry heat
	Industry	Food and tobacco	Lignite	Industry heat
	Industry	Food and tobacco	Peat	Industry heat
	Industry	Food and tobacco	Patent fuel	Industry heat
	Industry	Food and tobacco	Coke oven coke	Industry heat
	Industry	Food and tobacco	Gas coke	Industry heat
	Industry	Food and tobacco	Coal tar	Industry heat
	Industry	Food and tobacco	BKB	Industry heat
	Industry	Food and tobacco	Gas works gas	Industry heat
	Industry	Food and tobacco	Coke oven gas	Industry heat
	Industry	Food and tobacco	Blast furnace gas	Industry heat
	Industry	Food and tobacco	Other recovered gases	Industry heat
	Industry	Food and tobacco	Elec/heat output from non-specified manufactured gases	Industry heat
	Industry	Food and tobacco	Industrial waste	Industry heat
	Industry	Food and tobacco	Municipal waste (renewable)	Industry heat
	Industry	Food and tobacco	Municipal waste (non-renewable)	Industry heat
	Industry	Food and tobacco	Primary solid biofuels	Industry heat
	Industry	Food and tobacco	Biogases	Industry heat
	Industry	Food and tobacco	Biogasoline	Diesel industrial static
	Industry	Food and tobacco	Biodiesels	Diesel industrial static
	Industry	Food and tobacco	Other liquid biofuels	Diesel industrial static
	Industry	Food and tobacco	Non-specified primary biofuels and waste	Industry heat
	Industry	Food and tobacco	Charcoal	Industry heat
	Industry	Food and tobacco	Natural gas	Industry heat
	Industry	Food and tobacco	Crude/NGL/feedstocks (if no detail)	Industry heat
	Industry	Food and tobacco	Crude oil	Industry heat
	Industry	Food and tobacco	Natural gas liquids	Industry heat
	Industry	Food and tobacco	Refinery feedstocks	Industry heat
	Industry	Food and tobacco	Additives/blending components	Industry heat
	Industry	Food and tobacco	Other hydrocarbons	Industry heat
	Industry	Food and tobacco	Refinery gas	Industry heat
	Industry	Food and tobacco	Ethane	Industry heat
	Industry	Food and tobacco	Liquefied petroleum gases (LPG)	Industry heat
	Industry	Food and tobacco	Motor gasoline excl. biofuels	Diesel industrial static
	Industry	Food and tobacco	Aviation gasoline	Diesel industrial static
	Industry	Food and tobacco	Gasoline type jet fuel	Diesel industrial static
	Industry	Food and tobacco	Kerosene type jet fuel excl. biofuels	Diesel industrial static
	Industry	Food and tobacco	Other kerosene	Industry heat
	Industry	Food and tobacco	Gas/diesel oil excl. biofuels	Diesel industrial static
	Industry	Food and tobacco	Fuel oil	Industry heat
	Industry	Food and tobacco	Naphtha	Industry heat
	Industry	Food and tobacco	White spirit & SBP	Industry heat
	Industry	Food and tobacco	Lubricants	Industry heat
	Industry	Food and tobacco	Bitumen	Industry heat
	Industry	Food and tobacco	Paraffin waxes	Industry heat
	Industry	Food and tobacco	Petroleum coke	Industry heat
	Industry	Food and tobacco	Other oil products	Industry heat
	Industry	Food and tobacco	Heat output from non-specified combustible fuels	Industry heat
	Industry	Food and tobacco	Nuclear	No allocation
	Industry	Food and tobacco	Hydro	No allocation
	Industry	Food and tobacco	Geothermal	Industry heat
	Industry	Food and tobacco	Solar photovoltaics	No allocation
	Industry	Food and tobacco	Solar thermal	Industry heat
	Industry	Food and tobacco	Tide, wave and ocean	No allocation
	Industry	Food and tobacco	Wind	No allocation
	Industry	Food and tobacco	Other sources	No allocation
	Industry	Food and tobacco	Electricity	Electricity: Industry
	Industry	Food and tobacco	Heat	Industry heat
	Industry	Food and tobacco	Oil shale and oil sands	Industry heat
	Industry	Food and tobacco	Peat products	Industry heat
	Industry	Food and tobacco
	Industry	Paper, pulp and print	Hard coal (if no detail)	Industry heat
	Industry	Paper, pulp and print	Brown coal (if no detail)	Industry heat
	Industry	Paper, pulp and print	Anthracite	Industry heat
	Industry	Paper, pulp and print	Coking coal	Industry heat
	Industry	Paper, pulp and print	Other bituminous coal	Industry heat
	Industry	Paper, pulp and print	Sub-bituminous coal	Industry heat
	Industry	Paper, pulp and print	Lignite	Industry heat
	Industry	Paper, pulp and print	Peat	Industry heat
	Industry	Paper, pulp and print	Patent fuel	Industry heat
	Industry	Paper, pulp and print	Coke oven coke	Industry heat
	Industry	Paper, pulp and print	Gas coke	Industry heat
	Industry	Paper, pulp and print	Coal tar	Industry heat
	Industry	Paper, pulp and print	BKB	Industry heat
	Industry	Paper, pulp and print	Gas works gas	Industry heat
	Industry	Paper, pulp and print	Coke oven gas	Industry heat
	Industry	Paper, pulp and print	Blast furnace gas	Industry heat
	Industry	Paper, pulp and print	Other recovered gases	Industry heat
	Industry	Paper, pulp and print	Elec/heat output from non-specified manufactured gases	Industry heat
	Industry	Paper, pulp and print	Industrial waste	Industry heat
	Industry	Paper, pulp and print	Municipal waste (renewable)	Industry heat
	Industry	Paper, pulp and print	Municipal waste (non-renewable)	Industry heat
	Industry	Paper, pulp and print	Primary solid biofuels	Industry heat
	Industry	Paper, pulp and print	Biogases	Industry heat
	Industry	Paper, pulp and print	Biogasoline	Diesel industrial static
	Industry	Paper, pulp and print	Biodiesels	Diesel industrial static
	Industry	Paper, pulp and print	Other liquid biofuels	Diesel industrial static
	Industry	Paper, pulp and print	Non-specified primary biofuels and waste	Industry heat
	Industry	Paper, pulp and print	Charcoal	Industry heat
	Industry	Paper, pulp and print	Natural gas	Industry heat
	Industry	Paper, pulp and print	Crude/NGL/feedstocks (if no detail)	Industry heat
	Industry	Paper, pulp and print	Crude oil	Industry heat
	Industry	Paper, pulp and print	Natural gas liquids	Industry heat
	Industry	Paper, pulp and print	Refinery feedstocks	Industry heat
	Industry	Paper, pulp and print	Additives/blending components	Industry heat
	Industry	Paper, pulp and print	Other hydrocarbons	Industry heat
	Industry	Paper, pulp and print	Refinery gas	Industry heat
	Industry	Paper, pulp and print	Ethane	Industry heat
	Industry	Paper, pulp and print	Liquefied petroleum gases (LPG)	Industry heat
	Industry	Paper, pulp and print	Motor gasoline excl. biofuels	Diesel industrial static
	Industry	Paper, pulp and print	Aviation gasoline	Diesel industrial static
	Industry	Paper, pulp and print	Gasoline type jet fuel	Diesel industrial static
	Industry	Paper, pulp and print	Kerosene type jet fuel excl. biofuels	Diesel industrial static
	Industry	Paper, pulp and print	Other kerosene	Industry heat
	Industry	Paper, pulp and print	Gas/diesel oil excl. biofuels	Diesel industrial static
	Industry	Paper, pulp and print	Fuel oil	Industry heat
	Industry	Paper, pulp and print	Naphtha	Industry heat
	Industry	Paper, pulp and print	White spirit & SBP	Industry heat
	Industry	Paper, pulp and print	Lubricants	Industry heat
	Industry	Paper, pulp and print	Bitumen	Industry heat
	Industry	Paper, pulp and print	Paraffin waxes	Industry heat
	Industry	Paper, pulp and print	Petroleum coke	Industry heat
	Industry	Paper, pulp and print	Other oil products	Industry heat
	Industry	Paper, pulp and print	Heat output from non-specified combustible fuels	Industry heat
	Industry	Paper, pulp and print	Nuclear	No allocation
	Industry	Paper, pulp and print	Hydro	No allocation
	Industry	Paper, pulp and print	Geothermal	Industry heat
	Industry	Paper, pulp and print	Solar photovoltaics	No allocation
	Industry	Paper, pulp and print	Solar thermal	Industry heat
	Industry	Paper, pulp and print	Tide, wave and ocean	No allocation
	Industry	Paper, pulp and print	Wind	No allocation
	Industry	Paper, pulp and print	Other sources	No allocation
	Industry	Paper, pulp and print	Electricity	Electricity: Industry
	Industry	Paper, pulp and print	Heat	Industry heat
	Industry	Paper, pulp and print	Oil shale and oil sands	Industry heat
	Industry	Paper, pulp and print	Peat products	Industry heat
	Industry	Paper, pulp and print
	Industry	Wood and wood products	Hard coal (if no detail)	Industry heat
	Industry	Wood and wood products	Brown coal (if no detail)	Industry heat
	Industry	Wood and wood products	Anthracite	Industry heat
	Industry	Wood and wood products	Coking coal	Industry heat
	Industry	Wood and wood products	Other bituminous coal	Industry heat
	Industry	Wood and wood products	Sub-bituminous coal	Industry heat
	Industry	Wood and wood products	Lignite	Industry heat
	Industry	Wood and wood products	Peat	Industry heat
	Industry	Wood and wood products	Patent fuel	Industry heat
	Industry	Wood and wood products	Coke oven coke	Industry heat
	Industry	Wood and wood products	Gas coke	Industry heat
	Industry	Wood and wood products	Coal tar	Industry heat
	Industry	Wood and wood products	BKB	Industry heat
	Industry	Wood and wood products	Gas works gas	Industry heat
	Industry	Wood and wood products	Coke oven gas	Industry heat
	Industry	Wood and wood products	Blast furnace gas	Industry heat
	Industry	Wood and wood products	Other recovered gases	Industry heat
	Industry	Wood and wood products	Elec/heat output from non-specified manufactured gases	Industry heat
	Industry	Wood and wood products	Industrial waste	Industry heat
	Industry	Wood and wood products	Municipal waste (renewable)	Industry heat
	Industry	Wood and wood products	Municipal waste (non-renewable)	Industry heat
	Industry	Wood and wood products	Primary solid biofuels	Industry heat
	Industry	Wood and wood products	Biogases	Industry heat
	Industry	Wood and wood products	Biogasoline	Diesel industrial static
	Industry	Wood and wood products	Biodiesels	Diesel industrial static
	Industry	Wood and wood products	Other liquid biofuels	Diesel industrial static
	Industry	Wood and wood products	Non-specified primary biofuels and waste	Industry heat
	Industry	Wood and wood products	Charcoal	Industry heat
	Industry	Wood and wood products	Natural gas	Industry heat
	Industry	Wood and wood products	Crude/NGL/feedstocks (if no detail)	Industry heat
	Industry	Wood and wood products	Crude oil	Industry heat
	Industry	Wood and wood products	Natural gas liquids	Industry heat
	Industry	Wood and wood products	Refinery feedstocks	Industry heat
	Industry	Wood and wood products	Additives/blending components	Industry heat
	Industry	Wood and wood products	Other hydrocarbons	Industry heat
	Industry	Wood and wood products	Refinery gas	Industry heat
	Industry	Wood and wood products	Ethane	Industry heat
	Industry	Wood and wood products	Liquefied petroleum gases (LPG)	Industry heat
	Industry	Wood and wood products	Motor gasoline excl. biofuels	Diesel industrial static
	Industry	Wood and wood products	Aviation gasoline	Diesel industrial static
	Industry	Wood and wood products	Gasoline type jet fuel	Diesel industrial static
	Industry	Wood and wood products	Kerosene type jet fuel excl. biofuels	Diesel industrial static
	Industry	Wood and wood products	Other kerosene	Industry heat
	Industry	Wood and wood products	Gas/diesel oil excl. biofuels	Diesel industrial static
	Industry	Wood and wood products	Fuel oil	Industry heat
	Industry	Wood and wood products	Naphtha	Industry heat
	Industry	Wood and wood products	White spirit & SBP	Industry heat
	Industry	Wood and wood products	Lubricants	Industry heat
	Industry	Wood and wood products	Bitumen	Industry heat
	Industry	Wood and wood products	Paraffin waxes	Industry heat
	Industry	Wood and wood products	Petroleum coke	Industry heat
	Industry	Wood and wood products	Other oil products	Industry heat
	Industry	Wood and wood products	Heat output from non-specified combustible fuels	Industry heat
	Industry	Wood and wood products	Nuclear	No allocation
	Industry	Wood and wood products	Hydro	No allocation
	Industry	Wood and wood products	Geothermal	Industry heat
	Industry	Wood and wood products	Solar photovoltaics	No allocation
	Industry	Wood and wood products	Solar thermal	Industry heat
	Industry	Wood and wood products	Tide, wave and ocean	No allocation
	Industry	Wood and wood products	Wind	No allocation
	Industry	Wood and wood products	Other sources	No allocation
	Industry	Wood and wood products	Electricity	Electricity: Industry
	Industry	Wood and wood products	Heat	Industry heat
	Industry	Wood and wood products	Oil shale and oil sands	Industry heat
	Industry	Wood and wood products	Peat products	Industry heat
	Industry	Wood and wood products
	Industry	Construction	Hard coal (if no detail)	Industry heat
	Industry	Construction	Brown coal (if no detail)	Industry heat
	Industry	Construction	Anthracite	Industry heat
	Industry	Construction	Coking coal	Industry heat
	Industry	Construction	Other bituminous coal	Industry heat
	Industry	Construction	Sub-bituminous coal	Industry heat
	Industry	Construction	Lignite	Industry heat
	Industry	Construction	Peat	Industry heat
	Industry	Construction	Patent fuel	Industry heat
	Industry	Construction	Coke oven coke	Industry heat
	Industry	Construction	Gas coke	Industry heat
	Industry	Construction	Coal tar	Industry heat
	Industry	Construction	BKB	Industry heat
	Industry	Construction	Gas works gas	Industry heat
	Industry	Construction	Coke oven gas	Industry heat
	Industry	Construction	Blast furnace gas	Industry heat
	Industry	Construction	Other recovered gases	Industry heat
	Industry	Construction	Elec/heat output from non-specified manufactured gases	Industry heat
	Industry	Construction	Industrial waste	Industry heat
	Industry	Construction	Municipal waste (renewable)	Industry heat
	Industry	Construction	Municipal waste (non-renewable)	Industry heat
	Industry	Construction	Primary solid biofuels	Industry heat
	Industry	Construction	Biogases	Industry heat
	Industry	Construction	Biogasoline	Diesel industrial static
	Industry	Construction	Biodiesels	Diesel industrial static
	Industry	Construction	Other liquid biofuels	Diesel industrial static
	Industry	Construction	Non-specified primary biofuels and waste	Industry heat
	Industry	Construction	Charcoal	Industry heat
	Industry	Construction	Natural gas	Industry heat
	Industry	Construction	Crude/NGL/feedstocks (if no detail)	Industry heat
	Industry	Construction	Crude oil	Industry heat
	Industry	Construction	Natural gas liquids	Industry heat
	Industry	Construction	Refinery feedstocks	Industry heat
	Industry	Construction	Additives/blending components	Industry heat
	Industry	Construction	Other hydrocarbons	Industry heat
	Industry	Construction	Refinery gas	Industry heat
	Industry	Construction	Ethane	Industry heat
	Industry	Construction	Liquefied petroleum gases (LPG)	Industry heat
	Industry	Construction	Motor gasoline excl. biofuels	Diesel industrial static
	Industry	Construction	Aviation gasoline	Diesel industrial static
	Industry	Construction	Gasoline type jet fuel	Diesel industrial static
	Industry	Construction	Kerosene type jet fuel excl. biofuels	Diesel industrial static
	Industry	Construction	Other kerosene	Industry heat
	Industry	Construction	Gas/diesel oil excl. biofuels	Diesel industrial static
	Industry	Construction	Fuel oil	Industry heat
	Industry	Construction	Naphtha	Industry heat
	Industry	Construction	White spirit & SBP	Industry heat
	Industry	Construction	Lubricants	Industry heat
	Industry	Construction	Bitumen	Industry heat
	Industry	Construction	Paraffin waxes	Industry heat
	Industry	Construction	Petroleum coke	Industry heat
	Industry	Construction	Other oil products	Industry heat
	Industry	Construction	Heat output from non-specified combustible fuels	Industry heat
	Industry	Construction	Nuclear	No allocation
	Industry	Construction	Hydro	No allocation
	Industry	Construction	Geothermal	Industry heat
	Industry	Construction	Solar photovoltaics	No allocation
	Industry	Construction	Solar thermal	Industry heat
	Industry	Construction	Tide, wave and ocean	No allocation
	Industry	Construction	Wind	No allocation
	Industry	Construction	Other sources	No allocation
	Industry	Construction	Electricity	Electricity: Industry
	Industry	Construction	Heat	Industry heat
	Industry	Construction	Oil shale and oil sands	Industry heat
	Industry	Construction	Peat products	Industry heat
	Industry	Construction
	Industry	Textile and leather	Hard coal (if no detail)	Industry heat
	Industry	Textile and leather	Brown coal (if no detail)	Industry heat
	Industry	Textile and leather	Anthracite	Industry heat
	Industry	Textile and leather	Coking coal	Industry heat
	Industry	Textile and leather	Other bituminous coal	Industry heat
	Industry	Textile and leather	Sub-bituminous coal	Industry heat
	Industry	Textile and leather	Lignite	Industry heat
	Industry	Textile and leather	Peat	Industry heat
	Industry	Textile and leather	Patent fuel	Industry heat
	Industry	Textile and leather	Coke oven coke	Industry heat
	Industry	Textile and leather	Gas coke	Industry heat
	Industry	Textile and leather	Coal tar	Industry heat
	Industry	Textile and leather	BKB	Industry heat
	Industry	Textile and leather	Gas works gas	Industry heat
	Industry	Textile and leather	Coke oven gas	Industry heat
	Industry	Textile and leather	Blast furnace gas	Industry heat
	Industry	Textile and leather	Other recovered gases	Industry heat
	Industry	Textile and leather	Elec/heat output from non-specified manufactured gases	Industry heat
	Industry	Textile and leather	Industrial waste	Industry heat
	Industry	Textile and leather	Municipal waste (renewable)	Industry heat
	Industry	Textile and leather	Municipal waste (non-renewable)	Industry heat
	Industry	Textile and leather	Primary solid biofuels	Industry heat
	Industry	Textile and leather	Biogases	Industry heat
	Industry	Textile and leather	Biogasoline	Diesel industrial static
	Industry	Textile and leather	Biodiesels	Diesel industrial static
	Industry	Textile and leather	Other liquid biofuels	Diesel industrial static
	Industry	Textile and leather	Non-specified primary biofuels and waste	Industry heat
	Industry	Textile and leather	Charcoal	Industry heat
	Industry	Textile and leather	Natural gas	Industry heat
	Industry	Textile and leather	Crude/NGL/feedstocks (if no detail)	Industry heat
	Industry	Textile and leather	Crude oil	Industry heat
	Industry	Textile and leather	Natural gas liquids	Industry heat
	Industry	Textile and leather	Refinery feedstocks	Industry heat
	Industry	Textile and leather	Additives/blending components	Industry heat
	Industry	Textile and leather	Other hydrocarbons	Industry heat
	Industry	Textile and leather	Refinery gas	Industry heat
	Industry	Textile and leather	Ethane	Industry heat
	Industry	Textile and leather	Liquefied petroleum gases (LPG)	Industry heat
	Industry	Textile and leather	Motor gasoline excl. biofuels	Diesel industrial static
	Industry	Textile and leather	Aviation gasoline	Diesel industrial static
	Industry	Textile and leather	Gasoline type jet fuel	Diesel industrial static
	Industry	Textile and leather	Kerosene type jet fuel excl. biofuels	Diesel industrial static
	Industry	Textile and leather	Other kerosene	Industry heat
	Industry	Textile and leather	Gas/diesel oil excl. biofuels	Diesel industrial static
	Industry	Textile and leather	Fuel oil	Industry heat
	Industry	Textile and leather	Naphtha	Industry heat
	Industry	Textile and leather	White spirit & SBP	Industry heat
	Industry	Textile and leather	Lubricants	Industry heat
	Industry	Textile and leather	Bitumen	Industry heat
	Industry	Textile and leather	Paraffin waxes	Industry heat
	Industry	Textile and leather	Petroleum coke	Industry heat
	Industry	Textile and leather	Other oil products	Industry heat
	Industry	Textile and leather	Heat output from non-specified combustible fuels	Industry heat
	Industry	Textile and leather	Nuclear	No allocation
	Industry	Textile and leather	Hydro	No allocation
	Industry	Textile and leather	Geothermal	Industry heat
	Industry	Textile and leather	Solar photovoltaics	No allocation
	Industry	Textile and leather	Solar thermal	Industry heat
	Industry	Textile and leather	Tide, wave and ocean	No allocation
	Industry	Textile and leather	Wind	No allocation
	Industry	Textile and leather	Other sources	No allocation
	Industry	Textile and leather	Electricity	Electricity: Industry
	Industry	Textile and leather	Heat	Industry heat
	Industry	Textile and leather	Oil shale and oil sands	Industry heat
	Industry	Textile and leather	Peat products	Industry heat
	Industry	Textile and leather
	Industry	Non-specified (industry)	Hard coal (if no detail)	Industry heat
	Industry	Non-specified (industry)	Brown coal (if no detail)	Industry heat
	Industry	Non-specified (industry)	Anthracite	Industry heat
	Industry	Non-specified (industry)	Coking coal	Industry heat
	Industry	Non-specified (industry)	Other bituminous coal	Industry heat
	Industry	Non-specified (industry)	Sub-bituminous coal	Industry heat
	Industry	Non-specified (industry)	Lignite	Industry heat
	Industry	Non-specified (industry)	Peat	Industry heat
	Industry	Non-specified (industry)	Patent fuel	Industry heat
	Industry	Non-specified (industry)	Coke oven coke	Industry heat
	Industry	Non-specified (industry)	Gas coke	Industry heat
	Industry	Non-specified (industry)	Coal tar	Industry heat
	Industry	Non-specified (industry)	BKB	Industry heat
	Industry	Non-specified (industry)	Gas works gas	Industry heat
	Industry	Non-specified (industry)	Coke oven gas	Industry heat
	Industry	Non-specified (industry)	Blast furnace gas	Industry heat
	Industry	Non-specified (industry)	Other recovered gases	Industry heat
	Industry	Non-specified (industry)	Elec/heat output from non-specified manufactured gases	Industry heat
	Industry	Non-specified (industry)	Industrial waste	Industry heat
	Industry	Non-specified (industry)	Municipal waste (renewable)	Industry heat
	Industry	Non-specified (industry)	Municipal waste (non-renewable)	Industry heat
	Industry	Non-specified (industry)	Primary solid biofuels	Industry heat
	Industry	Non-specified (industry)	Biogases	Industry heat
	Industry	Non-specified (industry)	Biogasoline	Diesel industrial static
	Industry	Non-specified (industry)	Biodiesels	Diesel industrial static
	Industry	Non-specified (industry)	Other liquid biofuels	Diesel industrial static
	Industry	Non-specified (industry)	Non-specified primary biofuels and waste	Industry heat
	Industry	Non-specified (industry)	Charcoal	Industry heat
	Industry	Non-specified (industry)	Natural gas	Industry heat
	Industry	Non-specified (industry)	Crude/NGL/feedstocks (if no detail)	Industry heat
	Industry	Non-specified (industry)	Crude oil	Industry heat
	Industry	Non-specified (industry)	Natural gas liquids	Industry heat
	Industry	Non-specified (industry)	Refinery feedstocks	Industry heat
	Industry	Non-specified (industry)	Additives/blending components	Industry heat
	Industry	Non-specified (industry)	Other hydrocarbons	Industry heat
	Industry	Non-specified (industry)	Refinery gas	Industry heat
	Industry	Non-specified (industry)	Ethane	Industry heat
	Industry	Non-specified (industry)	Liquefied petroleum gases (LPG)	Industry heat
	Industry	Non-specified (industry)	Motor gasoline excl. biofuels	Diesel industrial static
	Industry	Non-specified (industry)	Aviation gasoline	Diesel industrial static
	Industry	Non-specified (industry)	Gasoline type jet fuel	Diesel industrial static
	Industry	Non-specified (industry)	Kerosene type jet fuel excl. biofuels	Diesel industrial static
	Industry	Non-specified (industry)	Other kerosene	Industry heat
	Industry	Non-specified (industry)	Gas/diesel oil excl. biofuels	Diesel industrial static
	Industry	Non-specified (industry)	Fuel oil	Industry heat
	Industry	Non-specified (industry)	Naphtha	Industry heat
	Industry	Non-specified (industry)	White spirit & SBP	Industry heat
	Industry	Non-specified (industry)	Lubricants	Industry heat
	Industry	Non-specified (industry)	Bitumen	Industry heat
	Industry	Non-specified (industry)	Paraffin waxes	Industry heat
	Industry	Non-specified (industry)	Petroleum coke	Industry heat
	Industry	Non-specified (industry)	Other oil products	Industry heat
	Industry	Non-specified (industry)	Heat output from non-specified combustible fuels	Industry heat
	Industry	Non-specified (industry)	Nuclear	No allocation
	Industry	Non-specified (industry)	Hydro	No allocation
	Industry	Non-specified (industry)	Geothermal	Industry heat
	Industry	Non-specified (industry)	Solar photovoltaics	No allocation
	Industry	Non-specified (industry)	Solar thermal	Industry heat
	Industry	Non-specified (industry)	Tide, wave and ocean	No allocation
	Industry	Non-specified (industry)	Wind	No allocation
	Industry	Non-specified (industry)	Other sources	No allocation
	Industry	Non-specified (industry)	Electricity	Electricity: Industry
	Industry	Non-specified (industry)	Heat	Industry heat
	Industry	Non-specified (industry)	Oil shale and oil sands	Industry heat
	Industry	Non-specified (industry)	Peat products	Industry heat
	Industry	Non-specified (industry)
	Transport	Domestic aviation	Hard coal (if no detail)	Aviation
	Transport	Domestic aviation	Brown coal (if no detail)	Aviation
	Transport	Domestic aviation	Anthracite	Aviation
	Transport	Domestic aviation	Coking coal	Aviation
	Transport	Domestic aviation	Other bituminous coal	Aviation
	Transport	Domestic aviation	Sub-bituminous coal	Aviation
	Transport	Domestic aviation	Lignite	Aviation
	Transport	Domestic aviation	Peat	Aviation
	Transport	Domestic aviation	Patent fuel	Aviation
	Transport	Domestic aviation	Coke oven coke	Aviation
	Transport	Domestic aviation	Gas coke	Aviation
	Transport	Domestic aviation	Coal tar	Aviation
	Transport	Domestic aviation	BKB	Aviation
	Transport	Domestic aviation	Gas works gas	Aviation
	Transport	Domestic aviation	Coke oven gas	Aviation
	Transport	Domestic aviation	Blast furnace gas	Aviation
	Transport	Domestic aviation	Other recovered gases	Aviation
[truncated: 709 more rows]

## Sheet: 4
	Supplementary Materials 4
	Allocating non-electric heat to end-uses
	Industrial heat
	All years. Using [13-14] and dividing final energy of low temperature heat category evenly between space and water heating
		Sub-sector	HT heat (%)	MT heat (%)	Water (%)	Space (%)
		Iron and steel	0.95	0.04	0.005	0.005
		Chemical and petrochemical	0.49	0.28	0.115	0.115
		Non-ferrous metals	0.95	0.04	0.005	0.005
		Non-metallic minerals	0.88	0.06	0.03	0.03
		Transport Equipment	0.1	0.3	0.3	0.3
		Machinery	0.1	0.3	0.3	0.3
		Mining and quarrying	0	0.5	0.25	0.25
		Food and tobacco	0	0.45	0.275	0.275
		Paper, pulp and print	0.18	0.55	0.135	0.135
		Wood & wood products	0.16	0.35	0.245	0.245
		Construction	0.16	0.35	0.245	0.245
		Textile and leather	0.16	0.35	0.245	0.245
		Non-specified (industry)	0.16	0.35	0.245	0.245
	Residential heat
	Using [3] tables 3.02 and 3.04
		End-use	1960	1961	1962	1963	1964	1965	1966	1967	1968	1969	1970	1971	1972	1973	1974	1975	1976	1977	1978	1979	1980	1981	1982	1983	1984	1985	1986	1987	1988	1989	1990	1991	1992	1993	1994	1995	1996	1997	1998	1999	2000	2001	2002	2003	2004	2005	2006
		Space heating (%)	0.583819	0.588435	0.593051	0.597666	0.602282	0.606898	0.611514	0.61613	0.620746	0.625362	0.622482	0.602963	0.613225	0.627018	0.631276	0.623029	0.614545	0.628702	0.642797	0.671303	0.66106	0.660733	0.659064	0.661181	0.655061	0.69172	0.703832	0.709405	0.703303	0.688771	0.672815	0.711258	0.710416	0.720641	0.712367	0.705429	0.745515	0.729285	0.735434	0.740001	0.743638	0.754142	0.747547	0.748866	0.754058	0.748536	0.741926
		Water heating (%)	0.416181	0.411565	0.406949	0.402334	0.397718	0.393102	0.388486	0.38387	0.379254	0.374638	0.377518	0.397037	0.386775	0.372982	0.368724	0.376971	0.385455	0.371298	0.357203	0.328697	0.33894	0.339267	0.340936	0.338819	0.344939	0.30828	0.296168	0.290595	0.296697	0.311229	0.327185	0.288742	0.289584	0.279359	0.287633	0.294571	0.254485	0.270715	0.264566	0.259999	0.256362	0.245858	0.252453	0.251134	0.245942	0.251464	0.258074
	Commercial/public services heat
	Using [3] table 5.05 with extrapolation from 2010
		End-use	2010	2011
		Space heating (%)	0.803556	0.80448
		Water heating (%)	0.196444	0.19552
[truncated: 6 more columns]

## Sheet: 5a
	Supplementary Materials 5a
	Electricity allocation map
													Allocation
													1. Residential (to: appliances, space heating, water heating, lighting, cooling)
													2. Commercial/public sector (to: appliances, space heating, water heating, lighting, cooling)
													3. Industry (to: high-temp. industrial heat, medium-temp. industrial heat, space heating, water heating, electric motor, appliances)
													4. Other, i.e. agriculture (to: space heating, lighting, refrigeration, mechanical drive)
													5. Appliances (to: cold, wet, electronics, computing, cooking)
													a. Residential
													b. Commercial
													Reference Temperatures
													6. Space heating (all sectors)
													a. Reference environment (outdoor)
													b. Process temperature (desired indoor)
													7. Water heating
													a. Reference environment (indoor)
													b. Process temperature (water temperature)
													8. Medium-temperature industrial heat
													a. Reference environment (indoor)
													b. Process temperature
													9. Cooling (residential/commercial only)
													a. Reference environment (outdoor)
													b. Process temperature (desired indoor)
													10. Cold (e.g. refrigeration)
													a. Reference environment (indoor)
													b. Process temperature (refrigeration)
													11. Wet (e.g. dishwashing)
													a. Reference environment (indoor)
													b. Process temperature
													12. Cooking
													a. Reference environment (indoor)
													b. Process temperature
													Efficiency estimates (first-law)
													13. Space heater
													14. Water heater
													15. Lighting
													16. Cooling (AC)
													17. Industrial heat
													18. Electric motor
													19. Rail
													20. Cold (fridge/freezer)
													21. Wet (dishwasher)
													22. Consumer electronics
													23. Computing
													24. Electric cooker

## Sheet: 5b
	Supplementary Materials 5b
	Allocating electricity to end-uses and estimating efficiency: Sources of data used
	Number (see 4a)	Description	1960	1961	1962	1963	1964	1965	1966	1967	1968	1969	1970	1971	1972	1973	1974	1975	1976	1977	1978	1979	1980	1981	1982	1983	1984	1985	1986	1987	1988	1989	1990	1991	1992	1993	1994	1995	1996	1997	1998	1999	2000	2001	2002	2003	2004	2005	2006
	1	Allocation: Residential appliances
	1	Allocation: Residential space heating		Modelled using combination of [1], data tables, with extrapolations from [2] and [3] table 3.02																														[2]: Household electricity consumption data
	1	Allocation: Residential water heating
	1	Allocation: Residential lighting
	1	Allocation: Residential cooling	No domestic cooling
	2	Allocation: Commercial appliances																																										[2] Services electricity total minus sum of electricity heating, lighting, cooling
	2	Allocation: Commercial space heating						[4] tables		Interpolate between estimates of Hammond & Stapleton [4]								[4] tables										[4] tables										[4] tables						[2]	Interpolated 2001-2005			[2]: Services electricity consumption data
	2	Allocation: Commercial water heating						7 and 8		making assumptions regarding the split between								7 and 8										7 and 8										7 and 8						[2]	Interpolated 2001-2005			[2]: Services electricity consumption data
	2	Allocation: Commercial lighting								electricity and non-electricity																																		[2]	Interpolated 2001-2005			[2]: Services electricity consumption data
	2	Allocation: Commercial cooling																																										[2]	Interpolated 2001-2005			[2]: Services electricity consumption data
	3	Allocation: Industry HTH
	3	Allocation: Industry MTH		Extrapolation from earliest available data
	3	Allocation: Industry space heating
	3	Allocation: Industry water heating
	3	Allocation: Industry electric motors
	3	Allocation: Lighting
	3	Allocation: Refrigeration
	4	Allocation: Agricultural space heating	Static 2007 value (15%) from [5]
	4	Allocation: Agricultural lighting	Static 2007 value (11%) from [5]
	4	Allocation: Agricultural refrigeration	Static 2007 value (63%) from [5]
	4	Allocation: Agricultural electric motor	Static 2007 value (11%) from [5]
	5a	Allocation: Domestic appliances, cold
	5a	Allocation: Domestic appliances, wet		Extrapolation from 1970										[3] Table 3.08 (exc. Lighting)
	5a	Allocation: Domestic appliances, electronics
	5a	Allocation: Domestic appliances, computing
	5a	Allocation: Domestic appliances, cooking
	5b	Allocation: Services appliances, cold
	5b	Allocation: Services appliances, wet		Same as domestic
	5b	Allocation: Services appliances, electronics
	5b	Allocation: Services appliances, computing
	5b	Allocation: Services appliances, cooking
			1960	1961	1962	1963	1964	1965	1966	1967	1968	1969	1970	1971	1972	1973	1974	1975	1976	1977	1978	1979	1980	1981	1982	1983	1984	1985	1986	1987	1988	1989	1990	1991	1992	1993	1994	1995	1996	1997	1998	1999	2000	2001	2002	2003	2004	2005	2006
	6a	Space heating reference: Outdoor temperature	Average outdoor temperature, December-February [6]
	6b	Space heating process: Indoor temperature	Extrapolate from 1970.										[7] Table 6o. Average indoor temperature.
	7a	Water heating reference: Indoor temperature	Extrapolate from 1970.										[7] Table 6o. Average indoor temperature.
	7b	Water heating process: Hot water temperature	80°C
	8a	Industrial heat reference: Indoor temperature	Extrapolate from 1970.										[7] Table 6o. Average indoor temperature.
	8b	Industrial heat process: HT Process temperature	600°C
	8c	Industrial heat process: MT Process temperature	250°C
	9a	Cooling (AC) reference: Outdoor temperature	Average outdoor temperature, June-August [6]
	9b	Cooling (AC) process: Indoor temperature	Extrapolate from 1970.										[7] Table 6o. Average indoor temperature.
	10a	Cold (refrigeration) reference: Indoor temperature	Extrapolate from 1970.										[7] Table 6o. Average indoor temperature.
	10b	Cold(refrigeration) process: Refrigerated temp.	4°C
	11a	Wet (e.g. dishwash) reference: Indoor temperature	Extrapolate from 1970.										[7] Table 6o. Average indoor temperature.
	11b	Wet (e.g. dishwash) process temperature	80°C
	12a	Cooking reference: Indoor temperature	Extrapolate from 1970.										[7] Table 6o. Average indoor temperature.
	12b	Cooking process temperature	80°C
			1960	1961	1962	1963	1964	1965	1966	1967	1968	1969	1970	1971	1972	1973	1974	1975	1976	1977	1978	1979	1980	1981	1982	1983	1984	1985	1986	1987	1988	1989	1990	1991	1992	1993	1994	1995	1996	1997	1998	1999	2000	2001	2002	2003	2004	2005	2006
	13	1st-law efficiency: Space heater	100% throughout
	14	1st-law efficiency: Water heater	100% throughout
	15	1st-law efficiency: Lighting	Extrapolate back from 1970										Model based on relative shares of lighting in domestic settings [3] table 3.10, with efficiencies from [9-10]
	16	1st-law efficiency: Cooling (AC)	[10] table 5 - linear 75-80% over period																																									Extrapolation forward from previous
	17	1st-law efficiency: Industrial heat	[10] table 5 - linear 87-90% over period																																									Extrapolation forward from previous
	18	1st-law efficiency: Electric motor	[10] table 5 - linear 80-90% over period																																									Extrapolation forward from previous
	19	1st-law efficiency: Rail	[11]
	20	Exergy efficiency: Cold (fridge/freezer)	[12] 0.5 x domestic motor (70-80%) + 0.5 x refrigeration Carnot x (70-90%)
	21	Exergy efficiency efficiency: Wet (dishwasher)	[12] 0.5 x domestic motor (70-80%) + 0.5 x hot water Carnot x (70-90%)
	22	Exergy efficiency: Consumer electronics	[12] 0.1 in 1970, 1 in 2010 (i.e. efficiency of signal processing)
	23	Exergy efficiency: Computing	[12] 0.1 in 1970, 1 in 2010 (i.e. efficiency of signal processing)
	24	1st-law efficiency: Electric cooker	[11]
[truncated: 6 more columns]

## Sheet: 5c
	Supplementary Materials 5c
	Allocating electricity to end-uses: Values used
	Number (see 4a)	Description		1960	1961	1962	1963	1964	1965	1966	1967	1968	1969	1970	1971	1972	1973	1974	1975	1976	1977	1978	1979	1980	1981	1982	1983	1984	1985	1986	1987	1988	1989	1990	1991	1992	1993	1994	1995	1996	1997	1998	1999	2000	2001	2002	2003	2004	2005
	1	Allocation: Residential appliances	%	0.246796	0.250446	0.24426	0.241539	0.257752	0.26782	0.277575	0.285736	0.288793	0.289418	0.292165	0.294165	0.288836	0.291514	0.303697	0.331684	0.362057	0.373013	0.387153	0.385036	0.415327	0.439259	0.463632	0.480801	0.495523	0.495527	0.496179	0.506722	0.525515	0.538751	0.54164	0.51625	0.514231	0.520678	0.52135	0.522286	0.491405	0.518182	0.492268	0.495473	0.494882	0.483433	0.497452	0.501175	0.515409	0.521711
	1	Allocation: Residential space heating	%	0.255902	0.255972	0.262482	0.264913	0.254293	0.252199	0.249483	0.245846	0.245087	0.246403	0.246694	0.246626	0.251385	0.251082	0.244773	0.228789	0.211097	0.20555	0.198083	0.200769	0.183922	0.171305	0.158302	0.15015	0.143842	0.146152	0.147883	0.143586	0.134187	0.12784	0.127025	0.155199	0.155723	0.133596	0.131706	0.130095	0.155334	0.136652	0.151812	0.152584	0.155603	0.166068	0.158712	0.159088	0.154619	0.150831
	1	Allocation: Residential water heating	%	0.329917	0.330006	0.3384	0.341533	0.327842	0.325143	0.321641	0.316951	0.315973	0.317669	0.318044	0.317958	0.324093	0.323702	0.315568	0.294961	0.272152	0.265001	0.255375	0.258838	0.237118	0.220851	0.204088	0.193577	0.185446	0.188424	0.190655	0.185115	0.172998	0.164815	0.163764	0.170485	0.173614	0.188027	0.189879	0.190732	0.205631	0.189325	0.207484	0.205874	0.206759	0.214432	0.206541	0.204433	0.194365	0.192487
	1	Allocation: Residential lighting	%	0.167385	0.163576	0.154858	0.152016	0.160113	0.154838	0.151302	0.151467	0.150147	0.146509	0.143097	0.141251	0.135686	0.133702	0.135962	0.144565	0.154695	0.156436	0.159389	0.155357	0.163632	0.168585	0.173978	0.175473	0.175188	0.169897	0.165284	0.164577	0.167299	0.168593	0.167571	0.158066	0.156432	0.157699	0.157066	0.156888	0.147631	0.15584	0.148437	0.146069	0.142756	0.136068	0.137294	0.135304	0.135607	0.134971
	1	Allocation: Residential cooling	%	0	0	0	0	0	0	0	0	0	0	0	0	0	0	0	0	0	0	0	0	0	0	0	0	0	0	0	0	0	0	0	0	0	0	0	0	0	0	0	0	0	0	0	0	0	0
	2	Allocation: Commercial appliances	%	0.244405	0.244405	0.244405	0.244405	0.244405	0.244405	0.248519	0.252633	0.256747	0.260861	0.264976	0.26909	0.273204	0.277318	0.281432	0.285547	0.295205	0.304864	0.314523	0.324182	0.333841	0.3435	0.353158	0.362817	0.372476	0.382135	0.370464	0.358794	0.347123	0.335453	0.323782	0.312112	0.300441	0.288771	0.2771	0.26543	0.285469	0.305508	0.325547	0.345586	0.365625	0.385664	0.383008	0.38049	0.378098	0.375823
	2	Allocation: Commercial space heating	%	0.1116	0.1116	0.1116	0.1116	0.1116	0.1116	0.115448	0.119296	0.123144	0.126992	0.13084	0.134688	0.138536	0.142384	0.146232	0.15008	0.152586	0.155092	0.157598	0.160104	0.16261	0.165116	0.167622	0.170128	0.172634	0.17514	0.178206	0.181272	0.184338	0.187404	0.19047	0.193536	0.196602	0.199668	0.202734	0.2058	0.178861	0.151923	0.124984	0.0980454	0.0711068	0.0441681	0.0423392	0.0406047	0.0389575	0.0373913
	2	Allocation: Commercial water heating	%	0.01705	0.01705	0.01705	0.01705	0.01705	0.01705	0.017809	0.018568	0.019327	0.020086	0.020845	0.021604	0.022363	0.023122	0.023881	0.02464	0.024956	0.025272	0.025588	0.025904	0.02622	0.026536	0.026852	0.027168	0.027484	0.0278	0.028107	0.028414	0.028721	0.029028	0.029335	0.029642	0.029949	0.030256	0.030563	0.03087	0.0330864	0.0353027	0.0375191	0.0397354	0.0419518	0.0441681	0.0423392	0.0406047	0.0389575	0.0373913
	2	Allocation: Commercial lighting	%	0.626945	0.626945	0.626945	0.626945	0.626945	0.626945	0.618224	0.609503	0.600782	0.592061	0.583339	0.574618	0.565897	0.557176	0.548455	0.539733	0.52464	0.509547	0.494453	0.47936	0.464267	0.449173	0.43408	0.418987	0.403893	0.3888	0.394485	0.40017	0.405855	0.41154	0.417225	0.42291	0.428595	0.43428	0.439965	0.44565	0.447721	0.449792	0.451862	0.453933	0.456004	0.458075	0.454825	0.451743	0.448817	0.446034
	2	Allocation: Commercial cooling	%	0	0	0	0	0	0	0	0	0	0	0	0	0	0	0	0	0.00261251	0.00522501	0.00783752	0.01045	0.0130625	0.015675	0.0182875	0.0209	0.0235125	0.0261251	0.0287376	0.0313501	0.0339626	0.0365751	0.0391876	0.0418001	0.0444126	0.0470251	0.0496376	0.0522501	0.0548626	0.0574751	0.0600876	0.0627001	0.0653126	0.0679251	0.0774885	0.0865577	0.0951702	0.10336
	3	Allocation: Industry HTH	%	0.140444	0.140444	0.140444	0.140444	0.140444	0.140444	0.140444	0.140444	0.140444	0.140444	0.140444	0.140444	0.140444	0.140444	0.140444	0.140444	0.140444	0.140444	0.140444	0.140444	0.140444	0.140444	0.140444	0.140444	0.140444	0.140444	0.140444	0.140444	0.140444	0.140444	0.140444	0.140444	0.140444	0.140444	0.140444	0.140444	0.140444	0.140444	0.140444	0.140444	0.140444	0.140444	0.140444	0.140444	0.140444	0.140444
	3	Allocation: Industry MTH	%	0.255444	0.255444	0.255444	0.255444	0.255444	0.255444	0.255444	0.255444	0.255444	0.255444	0.255444	0.255444	0.255444	0.255444	0.255444	0.255444	0.255444	0.255444	0.255444	0.255444	0.255444	0.255444	0.255444	0.255444	0.255444	0.255444	0.255444	0.255444	0.255444	0.255444	0.255444	0.255444	0.255444	0.255444	0.255444	0.255444	0.255444	0.255444	0.255444	0.255444	0.255444	0.255444	0.255444	0.255444	0.255444	0.255444
	3	Allocation: Industry space heating	%	0.0866445	0.0866445	0.0866445	0.0866445	0.0866445	0.0866445	0.0866445	0.0866445	0.0866445	0.0866445	0.0866445	0.0866445	0.0866445	0.0866445	0.0866445	0.0866445	0.0866445	0.0866445	0.0866445	0.0866445	0.0866445	0.0866445	0.0866445	0.0866445	0.0866445	0.0866445	0.0866445	0.0866445	0.0866445	0.0866445	0.0866445	0.0866445	0.0866445	0.0866445	0.0866445	0.0866445	0.0866445	0.0866445	0.0866445	0.0866445	0.0866445	0.0866445	0.0866445	0.0866445	0.0866445	0.0866445
	3	Allocation: Industry water heating	%	0.0553911	0.0553911	0.0553911	0.0553911	0.0553911	0.0553911	0.0553911	0.0553911	0.0553911	0.0553911	0.0553911	0.0553911	0.0553911	0.0553911	0.0553911	0.0553911	0.0553911	0.0553911	0.0553911	0.0553911	0.0553911	0.0553911	0.0553911	0.0553911	0.0553911	0.0553911	0.0553911	0.0553911	0.0553911	0.0553911	0.0553911	0.0553911	0.0553911	0.0553911	0.0553911	0.0553911	0.0553911	0.0553911	0.0553911	0.0553911	0.0553911	0.0553911	0.0553911	0.0553911	0.0553911	0.0553911
	3	Allocation: Industry electric motors	%	0.366513	0.366513	0.366513	0.366513	0.366513	0.366513	0.366513	0.366513	0.366513	0.366513	0.366513	0.366513	0.366513	0.366513	0.366513	0.366513	0.366513	0.366513	0.366513	0.366513	0.366513	0.366513	0.366513	0.366513	0.366513	0.366513	0.366513	0.366513	0.366513	0.366513	0.366513	0.366513	0.366513	0.366513	0.366513	0.366513	0.366513	0.366513	0.366513	0.366513	0.366513	0.366513	0.366513	0.366513	0.366513	0.366513
		Allocation: Lighting	%	0.0322369	0.0322369	0.0322369	0.0322369	0.0322369	0.0322369	0.0322369	0.0322369	0.0322369	0.0322369	0.0322369	0.0322369	0.0322369	0.0322369	0.0322369	0.0322369	0.0322369	0.0322369	0.0322369	0.0322369	0.0322369	0.0322369	0.0322369	0.0322369	0.0322369	0.0322369	0.0322369	0.0322369	0.0322369	0.0322369	0.0322369	0.0322369	0.0322369	0.0322369	0.0322369	0.0322369	0.0322369	0.0322369	0.0322369	0.0322369	0.0322369	0.0322369	0.0322369	0.0322369	0.0322369	0.0322369
	3	Allocation: Refrigeration	%	0.0633261	0.0633261	0.0633261	0.0633261	0.0633261	0.0633261	0.0633261	0.0633261	0.0633261	0.0633261	0.0633261	0.0633261	0.0633261	0.0633261	0.0633261	0.0633261	0.0633261	0.0633261	0.0633261	0.0633261	0.0633261	0.0633261	0.0633261	0.0633261	0.0633261	0.0633261	0.0633261	0.0633261	0.0633261	0.0633261	0.0633261	0.0633261	0.0633261	0.0633261	0.0633261	0.0633261	0.0633261	0.0633261	0.0633261	0.0633261	0.0633261	0.0633261	0.0633261	0.0633261	0.0633261	0.0633261
	4	Allocation: Agricultural space heating	%	0.15	0.15	0.15	0.15	0.15	0.15	0.15	0.15	0.15	0.15	0.15	0.15	0.15	0.15	0.15	0.15	0.15	0.15	0.15	0.15	0.15	0.15	0.15	0.15	0.15	0.15	0.15	0.15	0.15	0.15	0.15	0.15	0.15	0.15	0.15	0.15	0.15	0.15	0.15	0.15	0.15	0.15	0.15	0.15	0.15	0.15
	4	Allocation: Agricultural lighting	%	0.11	0.11	0.11	0.11	0.11	0.11	0.11	0.11	0.11	0.11	0.11	0.11	0.11	0.11	0.11	0.11	0.11	0.11	0.11	0.11	0.11	0.11	0.11	0.11	0.11	0.11	0.11	0.11	0.11	0.11	0.11	0.11	0.11	0.11	0.11	0.11	0.11	0.11	0.11	0.11	0.11	0.11	0.11	0.11	0.11	0.11
	4	Allocation: Agricultural refrigeration	%	0.63	0.63	0.63	0.63	0.63	0.63	0.63	0.63	0.63	0.63	0.63	0.63	0.63	0.63	0.63	0.63	0.63	0.63	0.63	0.63	0.63	0.63	0.63	0.63	0.63	0.63	0.63	0.63	0.63	0.63	0.63	0.63	0.63	0.63	0.63	0.63	0.63	0.63	0.63	0.63	0.63	0.63	0.63	0.63	0.63	0.63
	4	Allocation: Agricultural electric motor	%	0.11	0.11	0.11	0.11	0.11	0.11	0.11	0.11	0.11	0.11	0.11	0.11	0.11	0.11	0.11	0.11	0.11	0.11	0.11	0.11	0.11	0.11	0.11	0.11	0.11	0.11	0.11	0.11	0.11	0.11	0.11	0.11	0.11	0.11	0.11	0.11	0.11	0.11	0.11	0.11	0.11	0.11	0.11	0.11	0.11	0.11
	5a	Allocation: Domestic appliances, cold	%	0.0860472	0.103717	0.119679	0.134168	0.147381	0.159478	0.170595	0.180846	0.190329	0.199127	0.207312	0.22342	0.244867	0.266218	0.286932	0.303188	0.316002	0.325063	0.332711	0.339394	0.343065	0.343458	0.342534	0.340233	0.337827	0.334955	0.332148	0.328911	0.324669	0.319169	0.313695	0.308482	0.304034	0.300205	0.296507	0.293367	0.290893	0.288207	0.284445	0.280189	0.275841	0.269014	0.261377	0.252064	0.241766	0.234432
	5a	Allocation: Domestic appliances, wet	%	0.124951	0.132971	0.140215	0.146792	0.152789	0.158279	0.163325	0.167977	0.172282	0.176275	0.17999	0.178839	0.178217	0.178329	0.179029	0.179245	0.179914	0.179558	0.17856	0.177634	0.178004	0.178799	0.179753	0.181597	0.18567	0.19198	0.19884	0.20536	0.211276	0.216002	0.219399	0.220834	0.221015	0.221038	0.220341	0.218915	0.217225	0.21463	0.212103	0.209468	0.207302	0.205759	0.204071	0.201677	0.200514	0.200958
	5a	Allocation: Domestic appliances, electronics	%	0.108125	0.112293	0.116058	0.119477	0.122593	0.125447	0.128069	0.130488	0.132725	0.1348	0.136731	0.136589	0.135201	0.133176	0.131306	0.132803	0.136012	0.142469	0.150264	0.15914	0.168716	0.179036	0.189927	0.199189	0.205359	0.209501	0.21223	0.214425	0.216579	0.220589	0.224623	0.229412	0.234467	0.238346	0.242555	0.245921	0.247746	0.250754	0.254928	0.25998	0.264945	0.269744	0.274498	0.282999	0.290597	0.292709
	5a	Allocation: Domestic appliances, computing	%	0	0	0	0	0	0	0	0	0	0	0	0	0	0	0	0	0	0	0	0.00144498	0.0041112	0.00658607	0.00889544	0.0110586	0.0130874	0.0150327	0.016918	0.0187886	0.020691	0.0225713	0.0245252	0.0266655	0.0287876	0.0309255	0.033188	0.0357065	0.0385281	0.0414801	0.0444565	0.0474586	0.0503628	0.056087	0.0619502	0.0670966	0.0739237	0.0800244
	5a	Allocation: Domestic appliances, cooking	%	0.680877	0.651019	0.624047	0.599563	0.577237	0.556796	0.538011	0.520689	0.504665	0.489798	0.475967	0.461153	0.441715	0.422277	0.402733	0.384764	0.368071	0.352909	0.338465	0.322387	0.306103	0.292121	0.27889	0.267922	0.258056	0.248531	0.239863	0.232516	0.226786	0.221669	0.217758	0.214606	0.211696	0.209484	0.20741	0.20609	0.205607	0.204929	0.204068	0.202905	0.20155	0.199396	0.198105	0.196164	0.1932	0.191876
	5b	Allocation: Services appliances, cold	%	0.0860472	0.103717	0.119679	0.134168	0.147381	0.159478	0.170595	0.180846	0.190329	0.199127	0.207312	0.22342	0.244867	0.266218	0.286932	0.303188	0.316002	0.325063	0.332711	0.339394	0.343065	0.343458	0.342534	0.340233	0.337827	0.334955	0.332148	0.328911	0.324669	0.319169	0.313695	0.308482	0.304034	0.300205	0.296507	0.293367	0.290893	0.288207	0.284445	0.280189	0.275841	0.269014	0.261377	0.252064	0.241766	0.234432
	5b	Allocation: Services appliances, wet	%	0.124951	0.132971	0.140215	0.146792	0.152789	0.158279	0.163325	0.167977	0.172282	0.176275	0.17999	0.178839	0.178217	0.178329	0.179029	0.179245	0.179914	0.179558	0.17856	0.177634	0.178004	0.178799	0.179753	0.181597	0.18567	0.19198	0.19884	0.20536	0.211276	0.216002	0.219399	0.220834	0.221015	0.221038	0.220341	0.218915	0.217225	0.21463	0.212103	0.209468	0.207302	0.205759	0.204071	0.201677	0.200514	0.200958
	5b	Allocation: Services appliances, electronics	%	0.108125	0.112293	0.116058	0.119477	0.122593	0.125447	0.128069	0.130488	0.132725	0.1348	0.136731	0.136589	0.135201	0.133176	0.131306	0.132803	0.136012	0.142469	0.150264	0.15914	0.168716	0.179036	0.189927	0.199189	0.205359	0.209501	0.21223	0.214425	0.216579	0.220589	0.224623	0.229412	0.234467	0.238346	0.242555	0.245921	0.247746	0.250754	0.254928	0.25998	0.264945	0.269744	0.274498	0.282999	0.290597	0.292709
	5b	Allocation: Services appliances, computing	%	0	0	0	0	0	0	0	0	0	0	0	0	0	0	0	0	0	0	0	0.00144498	0.0041112	0.00658607	0.00889544	0.0110586	0.0130874	0.0150327	0.016918	0.0187886	0.020691	0.0225713	0.0245252	0.0266655	0.0287876	0.0309255	0.033188	0.0357065	0.0385281	0.0414801	0.0444565	0.0474586	0.0503628	0.056087	0.0619502	0.0670966	0.0739237	0.0800244
	5b	Allocation: Services appliances, cooking	%	0.680877	0.651019	0.624047	0.599563	0.577237	0.556796	0.538011	0.520689	0.504665	0.489798	0.475967	0.461153	0.441715	0.422277	0.402733	0.384764	0.368071	0.352909	0.338465	0.322387	0.306103	0.292121	0.27889	0.267922	0.258056	0.248531	0.239863	0.232516	0.226786	0.221669	0.217758	0.214606	0.211696	0.209484	0.20741	0.20609	0.205607	0.204929	0.204068	0.202905	0.20155	0.199396	0.198105	0.196164	0.1932	0.191876
				1960	1961	1962	1963	1964	1965	1966	1967	1968	1969	1970	1971	1972	1973	1974	1975	1976	1977	1978	1979	1980	1981	1982	1983	1984	1985	1986	1987	1988	1989	1990	1991	1992	1993	1994	1995	1996	1997	1998	1999	2000	2001	2002	2003	2004	2005
	6a	Space heating reference: Outdoor temperature	K	277.75	278.05	276.75	272.85	276.65	276.45	277.55	278.25	276.65	276.35	276.45	277.55	278.05	278.05	278.55	279.55	278.35	276.45	277.25	274.75	277.75	277.65	275.75	277.45	277.35	275.85	276.05	276.65	278.45	279.65	279.35	276.15	277.75	277.85	277.85	279.05	276.15	277.15	279.25	278.55	278.55	277.65	278.55	277.85	278.25	278.35
	6b	Space heating process: Indoor temperature	K	285.104	285.179	285.254	285.33	285.405	285.48	285.556	285.631	285.706	285.782	285.132	285.932	285.75	285.724	286.496	286.113	285.515	286.6	286.707	285.915	286.511	285.961	286.715	287.228	286.739	286.472	287.244	286.984	288.074	288.399	289.287	288.571	288.708	289.06	289.824	289.416	289.462	290.446	290.959	290.663	290.844	290.696	291.547	290.801	291.294	291.69
	7a	Water heating reference: Indoor temperature	K	285.104	285.179	285.254	285.33	285.405	285.48	285.556	285.631	285.706	285.782	285.132	285.932	285.75	285.724	286.496	286.113	285.515	286.6	286.707	285.915	286.511	285.961	286.715	287.228	286.739	286.472	287.244	286.984	288.074	288.399	289.287	288.571	288.708	289.06	289.824	289.416	289.462	290.446	290.959	290.663	290.844	290.696	291.547	290.801	291.294	291.69
	7b	Water heating process: Hot water temperature	K	353.15	353.15	353.15	353.15	353.15	353.15	353.15	353.15	353.15	353.15	353.15	353.15	353.15	353.15	353.15	353.15	353.15	353.15	353.15	353.15	353.15	353.15	353.15	353.15	353.15	353.15	353.15	353.15	353.15	353.15	353.15	353.15	353.15	353.15	353.15	353.15	353.15	353.15	353.15	353.15	353.15	353.15	353.15	353.15	353.15	353.15
	8a	Industrial heat reference: Indoor temperature	K	285.104	285.179	285.254	285.33	285.405	285.48	285.556	285.631	285.706	285.782	285.132	285.932	285.75	285.724	286.496	286.113	285.515	286.6	286.707	285.915	286.511	285.961	286.715	287.228	286.739	286.472	287.244	286.984	288.074	288.399	289.287	288.571	288.708	289.06	289.824	289.416	289.462	290.446	290.959	290.663	290.844	290.696	291.547	290.801	291.294	291.69
	8b	Industrial heat process: HT Process temperature	K	873.15	874.15	875.15	876.15	877.15	878.15	879.15	880.15	881.15	882.15	883.15	884.15	885.15	886.15	887.15	888.15	889.15	890.15	891.15	892.15	893.15	894.15	895.15	896.15	897.15	898.15	899.15	900.15	901.15	902.15	903.15	904.15	905.15	906.15	907.15	908.15	909.15	910.15	911.15	912.15	913.15	914.15	915.15	916.15	917.15	918.15
	8c	Industrial heat process: MT Process temperature	K	523.15	523.15	523.15	523.15	523.15	523.15	523.15	523.15	523.15	523.15	523.15	523.15	523.15	523.15	523.15	523.15	523.15	523.15	523.15	523.15	523.15	523.15	523.15	523.15	523.15	523.15	523.15	523.15	523.15	523.15	523.15	523.15	523.15	523.15	523.15	523.15	523.15	523.15	523.15	523.15	523.15	523.15	523.15	523.15	523.15	523.15
	9a	Cooling (AC) reference: Outdoor temperature	K	288.55	288.15	287.55	287.95	288.25	287.65	288.15	288.65	288.25	288.85	289.05	288.15	287.35	288.75	287.95	290.05	290.95	287.55	287.65	288.15	287.95	288.15	288.85	290.25	289.45	287.65	287.95	287.95	287.95	289.65	289.35	288.65	288.85	288.05	289.35	290.55	288.95	289.75	288.35	289.05	288.85	289.25	288.95	290.45	289.35	289.35
	9b	Cooling (AC) process: Indoor temperature	K	285.104	285.179	285.254	285.33	285.405	285.48	285.556	285.631	285.706	285.782	285.132	285.932	285.75	285.724	286.496	286.113	285.515	286.6	286.707	285.915	286.511	285.961	286.715	287.228	286.739	286.472	287.244	286.984	288.074	288.399	289.287	288.571	288.708	289.06	289.824	289.416	289.462	290.446	290.959	290.663	290.844	290.696	291.547	290.801	291.294	291.69
	10a	Cold (refrigeration) reference: Indoor temperature	K	285.104	285.179	285.254	285.33	285.405	285.48	285.556	285.631	285.706	285.782	285.132	285.932	285.75	285.724	286.496	286.113	285.515	286.6	286.707	285.915	286.511	285.961	286.715	287.228	286.739	286.472	287.244	286.984	288.074	288.399	289.287	288.571	288.708	289.06	289.824	289.416	289.462	290.446	290.959	290.663	290.844	290.696	291.547	290.801	291.294	291.69
	10b	Cold(refrigeration) process: Refrigerated temp.	K	277.15	277.15	277.15	277.15	277.15	277.15	277.15	277.15	277.15	277.15	277.15	277.15	277.15	277.15	277.15	277.15	277.15	277.15	277.15	277.15	277.15	277.15	277.15	277.15	277.15	277.15	277.15	277.15	277.15	277.15	277.15	277.15	277.15	277.15	277.15	277.15	277.15	277.15	277.15	277.15	277.15	277.15	277.15	277.15	277.15	277.15
	11a	Wet (e.g. dishwash) reference: Indoor temperature	K	285.104	285.179	285.254	285.33	285.405	285.48	285.556	285.631	285.706	285.782	285.132	285.932	285.75	285.724	286.496	286.113	285.515	286.6	286.707	285.915	286.511	285.961	286.715	287.228	286.739	286.472	287.244	286.984	288.074	288.399	289.287	288.571	288.708	289.06	289.824	289.416	289.462	290.446	290.959	290.663	290.844	290.696	291.547	290.801	291.294	291.69
	11b	Wet (e.g. dishwash) process temperature	K	353.15	353.15	353.15	353.15	353.15	353.15	353.15	353.15	353.15	353.15	353.15	353.15	353.15	353.15	353.15	353.15	353.15	353.15	353.15	353.15	353.15	353.15	353.15	353.15	353.15	353.15	353.15	353.15	353.15	353.15	353.15	353.15	353.15	353.15	353.15	353.15	353.15	353.15	353.15	353.15	353.15	353.15	353.15	353.15	353.15	353.15
	12a	Cooking reference: Indoor temperature	K	285.104	285.179	285.254	285.33	285.405	285.48	285.556	285.631	285.706	285.782	285.132	285.932	285.75	285.724	286.496	286.113	285.515	286.6	286.707	285.915	286.511	285.961	286.715	287.228	286.739	286.472	287.244	286.984	288.074	288.399	289.287	288.571	288.708	289.06	289.824	289.416	289.462	290.446	290.959	290.663	290.844	290.696	291.547	290.801	291.294	291.69
	12b	Cooking process temperature	K	353.15	353.15	353.15	353.15	353.15	353.15	353.15	353.15	353.15	353.15	353.15	353.15	353.15	353.15	353.15	353.15	353.15	353.15	353.15	353.15	353.15	353.15	353.15	353.15	353.15	353.15	353.15	353.15	353.15	353.15	353.15	353.15	353.15	353.15	353.15	353.15	353.15	353.15	353.15	353.15	353.15	353.15	353.15	353.15	353.15	353.15
				1960	1961	1962	1963	1964	1965	1966	1967	1968	1969	1970	1971	1972	1973	1974	1975	1976	1977	1978	1979	1980	1981	1982	1983	1984	1985	1986	1987	1988	1989	1990	1991	1992	1993	1994	1995	1996	1997	1998	1999	2000	2001	2002	2003	2004	2005
	13	1st-law efficiency: Space heater	%	1	1	1	1	1	1	1	1	1	1	1	1	1	1	1	1	1	1	1	1	1	1	1	1	1	1	1	1	1	1	1	1	1	1	1	1	1	1	1	1	1	1	1	1	1	1
	14	1st-law efficiency: Water heater	%	1	1	1	1	1	1	1	1	1	1	1	1	1	1	1	1	1	1	1	1	1	1	1	1	1	1	1	1	1	1	1	1	1	1	1	1	1	1	1	1	1	1	1	1	1	1
	15	1st-law efficiency: Lighting	%	0.0108423	0.0113229	0.0118034	0.012284	0.0127645	0.013245	0.0137256	0.0142061	0.0146867	0.0151672	0.0156477	0.0161849	0.016718	0.0172444	0.0177625	0.0182708	0.0187678	0.0192517	0.0197209	0.0201736	0.020608	0.0210862	0.0215527	0.0220042	0.022439	0.0228559	0.0232562	0.0236417	0.0240212	0.0243884	0.0247458	0.0250963	0.025442	0.0257833	0.0261221	0.0264602	0.0267994	0.0271949	0.0277284	0.0284869	0.029276	0.0302846	0.0312769	0.0322817	0.0333067	0.0342985
	16	1st-law efficiency: Cooling (AC)	%	0.75	0.75125	0.7525	0.75375	0.755	0.75625	0.7575	0.75875	0.76	0.76125	0.7625	0.76375	0.765	0.76625	0.7675	0.76875	0.77	0.77125	0.7725	0.77375	0.775	0.77625	0.7775	0.77875	0.78	0.78125	0.7825	0.78375	0.785	0.78625	0.7875	0.78875	0.79	0.79125	0.7925	0.79375	0.795	0.79625	0.7975	0.79875	0.8	0.80125	0.8025	0.80375	0.805	0.80625
	17	1st-law efficiency: Industrial heat	%	0.87	0.87075	0.8715	0.87225	0.873	0.87375	0.8745	0.87525	0.876	0.87675	0.8775	0.87825	0.879	0.87975	0.8805	0.88125	0.882	0.88275	0.8835	0.88425	0.885	0.88575	0.8865	0.88725	0.888	0.88875	0.8895	0.89025	0.891	0.89175	0.8925	0.89325	0.894	0.89475	0.8955	0.89625	0.897	0.89775	0.8985	0.89925	0.9	0.90075	0.9015	0.90225	0.903	0.90375
	18	1st-law efficiency: Electric motor	%	0.8	0.8025	0.805	0.8075	0.81	0.8125	0.815	0.8175	0.82	0.8225	0.825	0.8275	0.83	0.8325	0.835	0.8375	0.84	0.8425	0.845	0.8475	0.85	0.8525	0.855	0.8575	0.86	0.8625	0.865	0.8675	0.87	0.8725	0.875	0.8775	0.88	0.8825	0.885	0.8875	0.89	0.8925	0.895	0.8975	0.9	0.9025	0.905	0.9075	0.91	0.9125
	19	1st-law efficiency: Rail	%	0.140673	0.140673	0.140673	0.140673	0.140673	0.140673	0.140673	0.140673	0.140673	0.140673	0.140673	0.140673	0.140673	0.140673	0.140673	0.140673	0.140673	0.140673	0.140673	0.140673	0.140673	0.140673	0.140673	0.147682	0.148652	0.146104	0.144146	0.143144	0.136589	0.139604	0.139559	0.137912	0.133606	0.133203	0.133672	0.136233	0.13654	0.137274	0.135078	0.137821	0.137238	0.135255	0.137595	0.135408	0.134581	0.133594
	20	Exergy efficiency: Cold (fridge/freezer)	%	0.404231	0.404922	0.405357	0.407033	0.408589	0.409005	0.410816	0.412634	0.413294	0.415249	0.417653	0.416678	0.417127	0.4203	0.419453	0.424082	0.427423	0.422552	0.423799	0.426857	0.42701	0.429331	0.430516	0.433037	0.433876	0.432947	0.43352	0.435156	0.434819	0.438082	0.437592	0.438868	0.440211	0.439738	0.441788	0.445464	0.444222	0.445189	0.44351	0.446267	0.446916	0.448999	0.448447	0.453198	0.45193	0.45254
	21	Exergy efficiency efficiency: Wet (dishwasher)	%	0.467439	0.469096	0.470751	0.472406	0.474059	0.475711	0.477362	0.479013	0.480662	0.48231	0.484726	0.485602	0.487524	0.489279	0.490165	0.492308	0.494692	0.495216	0.496817	0.499428	0.50048	0.502828	0.503689	0.504817	0.507102	0.509134	0.509948	0.511973	0.512394	0.513716	0.514356	0.516926	0.518465	0.51974	0.520503	0.522707	0.524351	0.524818	0.525866	0.527932	0.529394	0.531274	0.531869	0.534522	0.535571	0.536741
	22	Exergy efficiency: Consumer electronics	%	0.001	0.00118	0.00136	0.00154	0.00172	0.0019	0.00208	0.00226	0.00244	0.00262	0.0028	0.00298	0.00316	0.00334	0.00352	0.0037	0.00388	0.00406	0.00424	0.00442	0.0046	0.00478	0.00496	0.00514	0.00532	0.0055	0.00568	0.00586	0.00604	0.00622	0.0064	0.00658	0.00676	0.00694	0.00712	0.0073	0.00748	0.00766	0.00784	0.00802	0.0082	0.00838	0.00856	0.00874	0.00892	0.0091
	23	Exergy efficiency: Computing	%	0.001	0.00118	0.00136	0.00154	0.00172	0.0019	0.00208	0.00226	0.00244	0.00262	0.0028	0.00298	0.00316	0.00334	0.00352	0.0037	0.00388	0.00406	0.00424	0.00442	0.0046	0.00478	0.00496	0.00514	0.00532	0.0055	0.00568	0.00586	0.00604	0.00622	0.0064	0.00658	0.00676	0.00694	0.00712	0.0073	0.00748	0.00766	0.00784	0.00802	0.0082	0.00838	0.00856	0.00874	0.00892	0.0091
	24	1st-law efficiency: Electric cooker	%	0.9	0.9	0.9	0.9	0.9	0.9	0.9	0.9	0.9	0.9	0.9	0.9	0.9	0.9	0.9	0.9	0.9	0.9	0.9	0.9	0.9	0.9	0.9	0.9	0.9	0.9	0.9	0.9	0.9	0.9	0.9	0.9	0.9	0.9	0.9	0.9	0.9	0.9	0.9	0.9	0.9	0.9	0.9	0.9	0.9	0.9
[truncated: 7 more columns]

## Sheet: 6a
	Supplementary Materials 6a
	Final to useful efficiencies
	Base method		1960	1961	1962	1963	1964	1965	1966	1967	1968	1969	1970	1971	1972	1973	1974	1975	1976	1977	1978	1979	1980	1981	1982	1983	1984	1985	1986	1987	1988	1989	1990	1991	1992	1993	1994	1995	1996	1997	1998	1999	2000	2001	2002	2003	2004	2005	2006
	Non-elec. Space heating	%	0.0113923	0.0111964	0.0139238	0.0215607	0.0148968	0.015687	0.0139739	0.0129952	0.0165794	0.0176301	0.0178496	0.0174393	0.0162677	0.0164534	0.0172411	0.0144679	0.0160618	0.0229972	0.0217333	0.0261052	0.020737	0.0199963	0.0266932	0.0241045	0.0235183	0.0270664	0.0286437	0.0267536	0.0250567	0.0229653	0.0262102	0.033142	0.0294539	0.0303277	0.0326391	0.0285457	0.0369748	0.0370812	0.0328384	0.034214	0.0349138	0.0373385	0.0373137	0.0374537	0.0378394	0.0388269	0.0403134
	Non-elec. Water heating	%	0.122333	0.123876	0.127589	0.129615	0.130162	0.132814	0.134078	0.135815	0.138321	0.140373	0.142014	0.143925	0.146861	0.148454	0.150525	0.152063	0.154192	0.157477	0.159849	0.16329	0.164629	0.167275	0.16861	0.170588	0.173715	0.178221	0.179619	0.181036	0.181294	0.181485	0.182699	0.186583	0.187434	0.189616	0.189926	0.191054	0.195597	0.194148	0.196046	0.196587	0.198514	0.200737	0.200463	0.201624	0.202673	0.203678	0.203507
	Non-elec. MT industrial heat	%	0.112993	0.120049	0.120552	0.127441	0.132046	0.135836	0.13635	0.137024	0.13608	0.134652	0.134972	0.138321	0.151903	0.118748	0.117389	0.106006	0.100799	0.108111	0.109407	0.106004	0.10711	0.124588	0.129469	0.138437	0.141196	0.144879	0.154948	0.160946	0.166916	0.159506	0.165946	0.1669	0.170514	0.173069	0.177482	0.179476	0.186412	0.185689	0.183772	0.180143	0.183109	0.180561	0.192909	0.184938	0.18936	0.18973	0.195356
	Non-elec. HT industrial heat	%	0.214518	0.22792	0.228885	0.241884	0.250544	0.257668	0.258608	0.259861	0.257987	0.255179	0.255744	0.262161	0.287831	0.224987	0.222248	0.200523	0.190556	0.204358	0.206556	0.200188	0.201917	0.235411	0.244526	0.261732	0.266821	0.273984	0.293064	0.304593	0.315858	0.301754	0.314014	0.315975	0.322712	0.327518	0.335908	0.339654	0.352942	0.351509	0.34802	0.341147	0.34667	0.341818	0.365265	0.350408	0.358599	0.359457	0.370179
	Petrol road	%	0.157419	0.157419	0.157419	0.157419	0.157419	0.157419	0.157419	0.157419	0.157419	0.157419	0.157358	0.158407	0.157378	0.156174	0.157152	0.160976	0.16151	0.160425	0.158354	0.155949	0.160621	0.165805	0.166158	0.165658	0.167778	0.169598	0.169624	0.17356	0.175449	0.180202	0.177071	0.176947	0.175392	0.173697	0.17711	0.180001	0.178083	0.17886	0.181104	0.180727	0.180422	0.182245	0.182902	0.184353	0.184366	0.184138	0.186192
	Diesel car	%	0.108544	0.108544	0.108544	0.108544	0.108544	0.108544	0.108544	0.108544	0.108544	0.108544	0.10934	0.109964	0.1121	0.108275	0.108655	0.109751	0.110443	0.107678	0.108269	0.105762	0.111647	0.116075	0.112021	0.10662	0.102772	0.0991346	0.0927854	0.0994066	0.101192	0.109071	0.116576	0.124794	0.127628	0.133788	0.140965	0.152149	0.154783	0.159715	0.166434	0.173044	0.177033	0.181182	0.183532	0.187334	0.191517	0.192121	0.195884
	Diesel truck	%	0.108544	0.108544	0.108544	0.108544	0.108544	0.108544	0.108544	0.108544	0.108544	0.108544	0.10934	0.109964	0.1121	0.108275	0.108655	0.109751	0.110443	0.107678	0.108269	0.105762	0.111647	0.116075	0.112021	0.10662	0.102772	0.0991346	0.0927854	0.0994066	0.101192	0.109071	0.116576	0.124794	0.127628	0.133788	0.140965	0.152149	0.154783	0.159715	0.166434	0.173044	0.177033	0.181182	0.183532	0.187334	0.191517	0.192121	0.195884
	Aviation	%	0.200253	0.200815	0.201375	0.201934	0.202492	0.203049	0.203605	0.20416	0.204714	0.205267	0.205819	0.20637	0.20692	0.207813	0.207502	0.201188	0.203622	0.201325	0.205553	0.209765	0.212292	0.211352	0.203531	0.199654	0.202514	0.197459	0.192977	0.198152	0.199895	0.205006	0.207164	0.210071	0.214573	0.211554	0.216527	0.218429	0.218086	0.222889	0.222042	0.220305	0.217019	0.222226	0.221053	0.223737	0.221419	0.22121	0.227309
	Diesel ship	%	0.120732	0.121759	0.122783	0.123803	0.12482	0.125835	0.126846	0.127854	0.128858	0.12986	0.130858	0.131854	0.132846	0.133835	0.134821	0.135804	0.136784	0.137761	0.138735	0.139706	0.140673	0.141638	0.1426	0.137602	0.142904	0.142914	0.145385	0.153558	0.153516	0.165392	0.172787	0.170261	0.165438	0.175923	0.179689	0.179917	0.186316	0.186881	0.19293	0.188134	0.187567	0.183887	0.186064	0.184524	0.174231	0.197305	0.196362
	Diesel rail	%	0.120732	0.121759	0.122783	0.123803	0.12482	0.125835	0.126846	0.127854	0.128858	0.12986	0.130858	0.131854	0.132846	0.133835	0.134821	0.135804	0.136784	0.137761	0.138735	0.139706	0.140673	0.141638	0.1426	0.137602	0.142904	0.142914	0.145385	0.153558	0.153516	0.165392	0.172787	0.170261	0.165438	0.175923	0.179689	0.179917	0.186316	0.186881	0.19293	0.188134	0.187567	0.183887	0.186064	0.184524	0.174231	0.197305	0.196362
	Coal rail	%	0.020302	0.0204747	0.0206469	0.0208185	0.0209896	0.0211601	0.0213301	0.0214996	0.0216686	0.021837	0.0220049	0.0221723	0.0223391	0.0225055	0.0226713	0.0228366	0.0230014	0.0231656	0.0233294	0.0234926	0.0236554	0.0236554	0.0236554	0.0236554	0.0236554	0.0236554	0.0236554	0.0236554	0.0236554	0.0236554	0.0236554	0.0236554	0.0236554	0.0236554	0.0236554	0.0236554	0.0236554	0.0236554	0.0236554	0.0236554	0.0236554	0.0236554	0.0236554	0.0236554	0.0236554	0.0236554	0.0236554
	Diesel static motor	%	0.25	0.251	0.252	0.253	0.254	0.255	0.256	0.257	0.258	0.259	0.26	0.261	0.262	0.263	0.264	0.265	0.266	0.267	0.268	0.269	0.27	0.271	0.272	0.273	0.274	0.275	0.276	0.277	0.278	0.279	0.28	0.281	0.282	0.283	0.284	0.285	0.286	0.287	0.288	0.289	0.29	0.291	0.292	0.293	0.294	0.295	0.296
	Non-electric lighting (town gas)	%	0.00796047	0.00805744	0.008155	0.00825313	0.00835184	0.00845112	0.00855099	0.00865144	0.00875247	0.00885407	0.00895625	0.00905902	0.0092	0.0093	0.0094	0.0095	0.0096	0.0097	0.0098	0.0099	0.01	0.0101	0.0102	0.0103	0.0104	0.0105	0.0106	0.0107	0.0108	0.0109	0.011	0.011	0.011	0.011	0.011	0.011	0.011	0.011	0.011	0.011	0.011	0.011	0.011	0.011	0.011	0.011	0.011
	Elec HT industrial heat	%	0.585925	0.58668	0.587435	0.58819	0.588945	0.5897	0.590455	0.591209	0.591964	0.592718	0.594192	0.594226	0.595235	0.596089	0.596151	0.59736	0.598781	0.598533	0.599254	0.600866	0.601104	0.602476	0.602556	0.602874	0.604185	0.605277	0.605339	0.606423	0.60617	0.606675	0.606624	0.608158	0.608848	0.609326	0.609398	0.610627	0.611406	0.611261	0.61158	0.612698	0.613345	0.614315	0.614301	0.615861	0.6162	0.616635	0.618119
	Elec MT industrial heat	%	0.395872	0.396088	0.396303	0.396519	0.396734	0.396949	0.397164	0.397378	0.397593	0.397807	0.399237	0.398235	0.39888	0.399265	0.398306	0.399291	0.400638	0.399149	0.399307	0.400984	0.400317	0.401587	0.40065	0.400118	0.401286	0.40208	0.401105	0.401887	0.400368	0.400151	0.398972	0.400532	0.400633	0.400366	0.399395	0.400429	0.400685	0.39933	0.398783	0.399625	0.399648	0.400235	0.399101	0.400721	0.400202	0.399851	0.401341
	Elec water heating	%	0.192684	0.192471	0.192257	0.192044	0.191831	0.191617	0.191404	0.191191	0.190977	0.190764	0.192603	0.190337	0.190853	0.190926	0.18874	0.189827	0.191518	0.188448	0.188143	0.190385	0.1887	0.190257	0.188122	0.186668	0.188053	0.18881	0.186623	0.187361	0.184272	0.183352	0.180837	0.182867	0.182477	0.18148	0.179317	0.180473	0.180343	0.177555	0.176103	0.176942	0.176431	0.176849	0.174438	0.176552	0.175154	0.174035	0.175931
	Elec space heating	%	0.025793	0.0249984	0.0298132	0.0437378	0.0306757	0.0316321	0.0280354	0.025841	0.031698	0.033003	0.0304497	0.0293158	0.0269479	0.0268592	0.0277363	0.0229377	0.0250962	0.035414	0.0329856	0.0390517	0.0305766	0.0290628	0.0382428	0.0340429	0.032744	0.0370773	0.0389711	0.0360075	0.033409	0.0303373	0.0343515	0.0430415	0.037956	0.0387823	0.0413153	0.0358164	0.0459885	0.0457793	0.0402432	0.0416735	0.0422685	0.044878	0.0445803	0.0445347	0.0447804	0.0457325	0.0473162
	Elec wet appliance	%	0.467439	0.469096	0.470751	0.472406	0.474059	0.475711	0.477362	0.479013	0.480662	0.48231	0.484726	0.485602	0.487524	0.489279	0.490165	0.492308	0.494692	0.495216	0.496817	0.499428	0.50048	0.502828	0.503689	0.504817	0.507102	0.509134	0.509948	0.511973	0.512394	0.513716	0.514356	0.516926	0.518465	0.51974	0.520503	0.522707	0.524351	0.524818	0.525866	0.527932	0.529394	0.531274	0.531869	0.534522	0.535571	0.536741	0.539308
	Elec cooking	%	0.173415	0.173224	0.173032	0.17284	0.172648	0.172456	0.172264	0.172072	0.17188	0.171688	0.173343	0.171304	0.171767	0.171834	0.169866	0.170844	0.172366	0.169603	0.169329	0.171347	0.16983	0.171231	0.16931	0.168002	0.169248	0.169929	0.16796	0.168625	0.165845	0.165017	0.162753	0.16458	0.164229	0.163332	0.161385	0.162426	0.162309	0.1598	0.158493	0.159248	0.158788	0.159164	0.156994	0.158897	0.157639	0.156631	0.158338
	Space cooling	%	0	0	0	0	0	0	0	0	0	0	0	0	0	0	0	0	0	0	0	0	0	0	0	0	0	0	0	0	0	0	0	0	0	0	0	0	0.00140847	0.00191381	0.00721614	0.00445717	0.00552124	0.00400512	0.00721337	0.000970546	0.00540915	0.00651937	0.0018632
	Refrigeration	%	0.404231	0.404922	0.405357	0.407033	0.408589	0.409005	0.410816	0.412634	0.413294	0.415249	0.417653	0.416678	0.417127	0.4203	0.419453	0.424082	0.427423	0.422552	0.423799	0.426857	0.42701	0.429331	0.430516	0.433037	0.433876	0.432947	0.43352	0.435156	0.434819	0.438082	0.437592	0.438868	0.440211	0.439738	0.441788	0.445464	0.444222	0.445189	0.44351	0.446267	0.446916	0.448999	0.448447	0.453198	0.45193	0.45254	0.45643
	Elec motor	%	0.8	0.8025	0.805	0.8075	0.81	0.8125	0.815	0.8175	0.82	0.8225	0.825	0.8275	0.83	0.8325	0.835	0.8375	0.84	0.8425	0.845	0.8475	0.85	0.8525	0.855	0.8575	0.86	0.8625	0.865	0.8675	0.87	0.8725	0.875	0.8775	0.88	0.8825	0.885	0.8875	0.89	0.8925	0.895	0.8975	0.9	0.9025	0.905	0.9075	0.91	0.9125	0.915
	Elec rail	%	0.140673	0.140673	0.140673	0.140673	0.140673	0.140673	0.140673	0.140673	0.140673	0.140673	0.140673	0.140673	0.140673	0.140673	0.140673	0.140673	0.140673	0.140673	0.140673	0.140673	0.140673	0.140673	0.140673	0.147682	0.148652	0.146104	0.144146	0.143144	0.136589	0.139604	0.139559	0.137912	0.133606	0.133203	0.133672	0.136233	0.13654	0.137274	0.135078	0.137821	0.137238	0.135255	0.137595	0.135408	0.134581	0.133594	0.136375
	Elec lighting	%	0.0108423	0.0113229	0.0118034	0.012284	0.0127645	0.013245	0.0137256	0.0142061	0.0146867	0.0151672	0.0156477	0.0161849	0.016718	0.0172444	0.0177625	0.0182708	0.0187678	0.0192517	0.0197209	0.0201736	0.020608	0.0210862	0.0215527	0.0220042	0.022439	0.0228559	0.0232562	0.0236417	0.0240212	0.0243884	0.0247458	0.0250963	0.025442	0.0257833	0.0261221	0.0264602	0.0267994	0.0271949	0.0277284	0.0284869	0.029276	0.0302846	0.0312769	0.0322817	0.0333067	0.0342985	0.0352542
	Elec consumer electronics	%	0.001	0.00118	0.00136	0.00154	0.00172	0.0019	0.00208	0.00226	0.00244	0.00262	0.0028	0.00298	0.00316	0.00334	0.00352	0.0037	0.00388	0.00406	0.00424	0.00442	0.0046	0.00478	0.00496	0.00514	0.00532	0.0055	0.00568	0.00586	0.00604	0.00622	0.0064	0.00658	0.00676	0.00694	0.00712	0.0073	0.00748	0.00766	0.00784	0.00802	0.0082	0.00838	0.00856	0.00874	0.00892	0.0091	0.00928
	Elec computing	%	0.001	0.00118	0.00136	0.00154	0.00172	0.0019	0.00208	0.00226	0.00244	0.00262	0.0028	0.00298	0.00316	0.00334	0.00352	0.0037	0.00388	0.00406	0.00424	0.00442	0.0046	0.00478	0.00496	0.00514	0.00532	0.0055	0.00568	0.00586	0.00604	0.00622	0.0064	0.00658	0.00676	0.00694	0.00712	0.0073	0.00748	0.00766	0.00784	0.00802	0.0082	0.00838	0.00856	0.00874	0.00892	0.0091	0.00928
	Human muscle work	%	0.0119657	0.0118992	0.0118327	0.0117662	0.0116998	0.0116333	0.0115668	0.0115003	0.0114339	0.0113674	0.0113009	0.0112344	0.011168	0.0111015	0.011035	0.0109685	0.0109021	0.0108356	0.0107691	0.0107026	0.0106362	0.0105697	0.0105032	0.0104367	0.0103703	0.0103038	0.0102373	0.0101708	0.0101043	0.0100379	0.0099714	0.00990492	0.00983845	0.00977197	0.00970549	0.00963902	0.00957254	0.00950607	0.00943959	0.00937311	0.00930664	0.00924016	0.00917369	0.00910721	0.00904073	0.00897426	0.00890778
	Mechanical Drive alternative		1960	1961	1962	1963	1964	1965	1966	1967	1968	1969	1970	1971	1972	1973	1974	1975	1976	1977	1978	1979	1980	1981	1982	1983	1984	1985	1986	1987	1988	1989	1990	1991	1992	1993	1994	1995	1996	1997	1998	1999	2000	2001	2002	2003	2004	2005	2006
	Petrol road	%	0.157419	0.157419	0.157419	0.157419	0.157419	0.157419	0.157419	0.157419	0.157419	0.157419	0.157358	0.158407	0.157378	0.156174	0.157152	0.160976	0.16151	0.160425	0.158354	0.155949	0.160621	0.165805	0.166158	0.165658	0.167778	0.169598	0.169624	0.17356	0.175449	0.180202	0.177071	0.176947	0.175392	0.173697	0.17711	0.180001	0.178083	0.17886	0.181104	0.180727	0.180422	0.182245	0.182902	0.184353	0.184366	0.184138	0.186192
	Diesel car	%	0.108544	0.108544	0.108544	0.108544	0.108544	0.108544	0.108544	0.108544	0.108544	0.108544	0.10934	0.109964	0.1121	0.108275	0.108655	0.109751	0.110443	0.107678	0.108269	0.105762	0.111647	0.116075	0.112021	0.10662	0.102772	0.0991346	0.0927854	0.0994066	0.101192	0.109071	0.116576	0.124794	0.127628	0.133788	0.140965	0.152149	0.154783	0.159715	0.166434	0.173044	0.177033	0.181182	0.183532	0.187334	0.191517	0.192121	0.195884
	Diesel truck	%	0.108544	0.108544	0.108544	0.108544	0.108544	0.108544	0.108544	0.108544	0.108544	0.108544	0.10934	0.109964	0.1121	0.108275	0.108655	0.109751	0.110443	0.107678	0.108269	0.105762	0.111647	0.116075	0.112021	0.10662	0.102772	0.0991346	0.0927854	0.0994066	0.101192	0.109071	0.116576	0.124794	0.127628	0.133788	0.140965	0.152149	0.154783	0.159715	0.166434	0.173044	0.177033	0.181182	0.183532	0.187334	0.191517	0.192121	0.195884
	Aviation	%	0.200253	0.200815	0.201375	0.201934	0.202492	0.203049	0.203605	0.20416	0.204714	0.205267	0.205819	0.20637	0.20692	0.207813	0.207502	0.201188	0.203622	0.201325	0.205553	0.209765	0.212292	0.211352	0.203531	0.199654	0.202514	0.197459	0.192977	0.198152	0.199895	0.205006	0.207164	0.210071	0.214573	0.211554	0.216527	0.218429	0.218086	0.222889	0.222042	0.220305	0.217019	0.222226	0.221053	0.223737	0.221419	0.22121	0.227309
	Diesel ship	%	0.120732	0.121759	0.122783	0.123803	0.12482	0.125835	0.126846	0.127854	0.128858	0.12986	0.130858	0.131854	0.132846	0.133835	0.134821	0.135804	0.136784	0.137761	0.138735	0.139706	0.140673	0.141638	0.1426	0.137602	0.142904	0.142914	0.145385	0.153558	0.153516	0.165392	0.172787	0.170261	0.165438	0.175923	0.179689	0.179917	0.186316	0.186881	0.19293	0.188134	0.187567	0.183887	0.186064	0.184524	0.174231	0.197305	0.196362
	Diesel rail	%	0.120732	0.121759	0.122783	0.123803	0.12482	0.125835	0.126846	0.127854	0.128858	0.12986	0.130858	0.131854	0.132846	0.133835	0.134821	0.135804	0.136784	0.137761	0.138735	0.139706	0.140673	0.141638	0.1426	0.137602	0.142904	0.142914	0.145385	0.153558	0.153516	0.165392	0.172787	0.170261	0.165438	0.175923	0.179689	0.179917	0.186316	0.186881	0.19293	0.188134	0.187567	0.183887	0.186064	0.184524	0.174231	0.197305	0.196362
	Coal rail	%	0.020302	0.0204747	0.0206469	0.0208185	0.0209896	0.0211601	0.0213301	0.0214996	0.0216686	0.021837	0.0220049	0.0221723	0.0223391	0.0225055	0.0226713	0.0228366	0.0230014	0.0231656	0.0233294	0.0234926	0.0236554	0.0236554	0.0236554	0.0236554	0.0236554	0.0236554	0.0236554	0.0236554	0.0236554	0.0236554	0.0236554	0.0236554	0.0236554	0.0236554	0.0236554	0.0236554	0.0236554	0.0236554	0.0236554	0.0236554	0.0236554	0.0236554	0.0236554	0.0236554	0.0236554	0.0236554	0.0236554
	Diesel static motor	%	0.25	0.251	0.252	0.253	0.254	0.255	0.256	0.257	0.258	0.259	0.26	0.261	0.262	0.263	0.264	0.265	0.266	0.267	0.268	0.269	0.27	0.271	0.272	0.273	0.274	0.275	0.276	0.277	0.278	0.279	0.28	0.281	0.282	0.283	0.284	0.285	0.286	0.287	0.288	0.289	0.29	0.291	0.292	0.293	0.294	0.295	0.296
	HTH 'cold Carnot' alternative		1960	1961	1962	1963	1964	1965	1966	1967	1968	1969	1970	1971	1972	1973	1974	1975	1976	1977	1978	1979	1980	1981	1982	1983	1984	1985	1986	1987	1988	1989	1990	1991	1992	1993	1994	1995	1996	1997	1998	1999	2000	2001	2002	2003	2004	2005	2006
	Non-elec. HT industrial heat	%	0.360085	0.362103	0.364121	0.366139	0.368156	0.370174	0.372192	0.374209	0.376227	0.378245	0.380263	0.38228	0.384298	0.386316	0.388333	0.390351	0.392369	0.394387	0.396404	0.398422	0.40044	0.402457	0.404475	0.406493	0.408511	0.410528	0.412546	0.414564	0.416582	0.418599	0.420617	0.422635	0.424652	0.42667	0.428688	0.430706	0.432723	0.434741	0.436759	0.438776	0.440794	0.440794	0.440794	0.440794	0.440794	0.440794	0.440794
	HTH 'hot Carnot' alternative
	Non-elec. HT industrial heat	%	0.385272	0.387431	0.389589	0.391748	0.393907	0.396066	0.398225	0.400384	0.402543	0.404701	0.40686	0.409019	0.411178	0.413337	0.415496	0.417654	0.419813	0.421972	0.424131	0.42629	0.428449	0.430608	0.432766	0.434925	0.437084	0.439243	0.441402	0.443561	0.44572	0.447878	0.450037	0.452196	0.454355	0.456514	0.458673	0.460831	0.46299	0.465149	0.467308	0.469467	0.471626	0.471626	0.471626	0.471626	0.471626	0.471626	0.471626
	MTH 'cold Carnot' alternative		1960	1961	1962	1963	1964	1965	1966	1967	1968	1969	1970	1971	1972	1973	1974	1975	1976	1977	1978	1979	1980	1981	1982	1983	1984	1985	1986	1987	1988	1989	1990	1991	1992	1993	1994	1995	1996	1997	1998	1999	2000	2001	2002	2003	2004	2005	2006
	Non-elec. MT industrial heat	%	0.178187	0.179186	0.180184	0.181183	0.182181	0.18318	0.184178	0.185177	0.186175	0.187174	0.188172	0.189171	0.190169	0.191167	0.192166	0.193164	0.194163	0.195161	0.19616	0.197158	0.198157	0.199155	0.200154	0.201152	0.202151	0.203149	0.204147	0.205146	0.206144	0.207143	0.208141	0.20914	0.210138	0.211137	0.212135	0.213134	0.214132	0.215131	0.216129	0.217127	0.218126	0.218126	0.218126	0.218126	0.218126	0.218126	0.218126
	MTH 'hot Carnot' alternative
	Non-elec. MT industrial heat	%	0.220649	0.221885	0.223122	0.224358	0.225594	0.226831	0.228067	0.229304	0.23054	0.231776	0.233013	0.234249	0.235486	0.236722	0.237958	0.239195	0.240431	0.241668	0.242904	0.24414	0.245377	0.246613	0.24785	0.249086	0.250322	0.251559	0.252795	0.254031	0.255268	0.256504	0.257741	0.258977	0.260213	0.26145	0.262686	0.263923	0.265159	0.266395	0.267632	0.268868	0.270105	0.270105	0.270105	0.270105	0.270105	0.270105	0.270105
[truncated: 6 more columns]

## Sheet: 6b
	Supplementary Materials 6b
	HTH efficiency estimation
		Exergy Efficiency
		1960	1961	1962	1963	1964	1965	1966	1967	1968	1969	1970	1971	1972	1973	1974	1975	1976	1977	1978	1979	1980	1981	1982	1983	1984	1985	1986	1987	1988	1989	1990	1991	1992	1993	1994	1995	1996	1997	1998	1999	2000	2001	2002	2003	2004	2005	2006	2007
	Base	0.214518	0.22792	0.228885	0.241884	0.250544	0.257668	0.258608	0.259861	0.257987	0.255179	0.255744	0.262161	0.287831	0.224987	0.222248	0.200523	0.190556	0.204358	0.206556	0.200188	0.201917	0.235411	0.244526	0.261732	0.266821	0.273984	0.293064	0.304593	0.315858	0.301754	0.314014	0.315975	0.322712	0.327518	0.335908	0.339654	0.352942	0.351509	0.34802	0.341147	0.34667	0.341818	0.365265	0.350408	0.358599	0.359457	0.370179	0.383864
	Alt 1	0.360085	0.362103	0.364121	0.366139	0.368156	0.370174	0.372192	0.374209	0.376227	0.378245	0.380263	0.38228	0.384298	0.386316	0.388333	0.390351	0.392369	0.394387	0.396404	0.398422	0.40044	0.402457	0.404475	0.406493	0.408511	0.410528	0.412546	0.414564	0.416582	0.418599	0.420617	0.422635	0.424652	0.42667	0.428688	0.430706	0.432723	0.434741	0.436759	0.438776	0.440794	0.440794	0.440794	0.440794	0.440794	0.440794	0.440794	0.440794
	Alt 2	0.385272	0.387431	0.389589	0.391748	0.393907	0.396066	0.398225	0.400384	0.402543	0.404701	0.40686	0.409019	0.411178	0.413337	0.415496	0.417654	0.419813	0.421972	0.424131	0.42629	0.428449	0.430608	0.432766	0.434925	0.437084	0.439243	0.441402	0.443561	0.44572	0.447878	0.450037	0.452196	0.454355	0.456514	0.458673	0.460831	0.46299	0.465149	0.467308	0.469467	0.471626	0.471626	0.471626	0.471626	0.471626	0.471626	0.471626	0.471626
	Alternative method 1, 2 (Carnot method)
		First-law efficiency
	Cold Carnot	0.58	0.58325	0.5865	0.58975	0.593	0.59625	0.5995	0.60275	0.606	0.60925	0.6125	0.61575	0.619	0.62225	0.6255	0.62875	0.632	0.63525	0.6385	0.64175	0.645	0.64825	0.6515	0.65475	0.658	0.66125	0.6645	0.66775	0.671	0.67425	0.6775	0.68075	0.684	0.68725	0.6905	0.69375	0.697	0.70025	0.7035	0.70675	0.71	0.71	0.71	0.71	0.71	0.71	0.71	0.71
	Hot Carnot	0.58	0.58325	0.5865	0.58975	0.593	0.59625	0.5995	0.60275	0.606	0.60925	0.6125	0.61575	0.619	0.62225	0.6255	0.62875	0.632	0.63525	0.6385	0.64175	0.645	0.64825	0.6515	0.65475	0.658	0.66125	0.6645	0.66775	0.671	0.67425	0.6775	0.68075	0.684	0.68725	0.6905	0.69375	0.697	0.70025	0.7035	0.70675	0.71	0.71	0.71	0.71	0.71	0.71	0.71	0.71
		Tc
		1960	1961	1962	1963	1964	1965	1966	1967	1968	1969	1970	1971	1972	1973	1974	1975	1976	1977	1978	1979	1980	1981	1982	1983	1984	1985	1986	1987	1988	1989	1990	1991	1992	1993	1994	1995	1996	1997	1998	1999	2000	2001	2002	2003	2004	2005	2006	2007
	Cold Carnot	293.15	293.15	293.15	293.15	293.15	293.15	293.15	293.15	293.15	293.15	293.15	293.15	293.15	293.15	293.15	293.15	293.15	293.15	293.15	293.15	293.15	293.15	293.15	293.15	293.15	293.15	293.15	293.15	293.15	293.15	293.15	293.15	293.15	293.15	293.15	293.15	293.15	293.15	293.15	293.15	293.15	293.15	293.15	293.15	293.15	293.15	293.15	293.15
	Hot Carnot	293.15	293.15	293.15	293.15	293.15	293.15	293.15	293.15	293.15	293.15	293.15	293.15	293.15	293.15	293.15	293.15	293.15	293.15	293.15	293.15	293.15	293.15	293.15	293.15	293.15	293.15	293.15	293.15	293.15	293.15	293.15	293.15	293.15	293.15	293.15	293.15	293.15	293.15	293.15	293.15	293.15	293.15	293.15	293.15	293.15	293.15	293.15	293.15
		Th
		1960	1961	1962	1963	1964	1965	1966	1967	1968	1969	1970	1971	1972	1973	1974	1975	1976	1977	1978	1979	1980	1981	1982	1983	1984	1985	1986	1987	1988	1989	1990	1991	1992	1993	1994	1995	1996	1997	1998	1999	2000	2001	2002	2003	2004	2005	2006	2007
	Cold Carnot	773.15	773.15	773.15	773.15	773.15	773.15	773.15	773.15	773.15	773.15	773.15	773.15	773.15	773.15	773.15	773.15	773.15	773.15	773.15	773.15	773.15	773.15	773.15	773.15	773.15	773.15	773.15	773.15	773.15	773.15	773.15	773.15	773.15	773.15	773.15	773.15	773.15	773.15	773.15	773.15	773.15	773.15	773.15	773.15	773.15	773.15	773.15	773.15
	Hot Carnot	873.15	873.15	873.15	873.15	873.15	873.15	873.15	873.15	873.15	873.15	873.15	873.15	873.15	873.15	873.15	873.15	873.15	873.15	873.15	873.15	873.15	873.15	873.15	873.15	873.15	873.15	873.15	873.15	873.15	873.15	873.15	873.15	873.15	873.15	873.15	873.15	873.15	873.15	873.15	873.15	873.15	873.15	873.15	873.15	873.15	873.15	873.15	873.15
		Carnot factor
		1960	1961	1962	1963	1964	1965	1966	1967	1968	1969	1970	1971	1972	1973	1974	1975	1976	1977	1978	1979	1980	1981	1982	1983	1984	1985	1986	1987	1988	1989	1990	1991	1992	1993	1994	1995	1996	1997	1998	1999	2000	2001	2002	2003	2004	2005	2006	2007
	Cold Carnot	0.620837	0.620837	0.620837	0.620837	0.620837	0.620837	0.620837	0.620837	0.620837	0.620837	0.620837	0.620837	0.620837	0.620837	0.620837	0.620837	0.620837	0.620837	0.620837	0.620837	0.620837	0.620837	0.620837	0.620837	0.620837	0.620837	0.620837	0.620837	0.620837	0.620837	0.620837	0.620837	0.620837	0.620837	0.620837	0.620837	0.620837	0.620837	0.620837	0.620837	0.620837	0.620837	0.620837	0.620837	0.620837	0.620837	0.620837	0.620837
	Hot Carnot	0.664262	0.664262	0.664262	0.664262	0.664262	0.664262	0.664262	0.664262	0.664262	0.664262	0.664262	0.664262	0.664262	0.664262	0.664262	0.664262	0.664262	0.664262	0.664262	0.664262	0.664262	0.664262	0.664262	0.664262	0.664262	0.664262	0.664262	0.664262	0.664262	0.664262	0.664262	0.664262	0.664262	0.664262	0.664262	0.664262	0.664262	0.664262	0.664262	0.664262	0.664262	0.664262	0.664262	0.664262	0.664262	0.664262	0.664262	0.664262
	Base method
		Minimum exergy/unit:		1.3	GJ/ton	EAF
				8.6	GJ/ton	Basic Oxygen Furnace/Open Hearth Furnace
		1960	1961	1962	1963	1964	1965	1966	1967	1968	1969	1970	1971	1972	1973	1974	1975	1976	1977	1978	1979	1980	1981	1982	1983	1984	1985	1986	1987	1988	1989	1990	1991	1992	1993	1994	1995	1996	1997	1998	1999	2000	2001	2002	2003	2004	2005	2006	2007
	EAF steel produced (million tonnes)	1.7125	1.6744	1.5043	2.1101	2.9842	3.4907	3.395	3.4716	4.216	4.937	5.514	4.3613	4.9104	5.2934	5.2578	5.5619	6.7561	6.2693	7.2001	7.3849	4.5787	5.0378	4.6686	4.4909	4.8257	4.5369	4.1647	4.4572	4.9421	5.1126	4.6716	3.9343	4.1203	4.2948	4.3765	4.52109	4.2333	4.5129	3.88898	3.66229	3.60374	3.2718	2.7114	2.63849	3.09859	2.689	2.702	3.03
	BOF + OHF steel produced (million tonnes)	18.7221	18.7444	17.4258	18.9112	21.8179	22.2425	20.2386	19.7782	20.9784	21.2086	22.455	19.5198	20.1239	21.0307	16.8959	14.5099	15.4961	14.1213	13.0998	14.0566	6.6886	10.5346	9.0358	10.4955	10.2953	11.185	10.5603	12.9565	14.0079	13.6273	13.1691	12.5401	12.0916	12.3299	12.9093	13.0825	13.7584	13.9876	13.426	12.6335	11.5509	10.2708	8.95572	10.6295	10.6672	10.5497	11.203	11.362
	Total steel produced (million tonnes)	20.4346	20.4188	18.9301	21.0213	24.8021	25.7332	23.6336	23.2498	25.1944	26.1456	27.969	23.8811	25.0343	26.3241	22.1537	20.0718	22.2522	20.3906	20.2999	21.4415	11.2673	15.5724	13.7044	14.9864	15.121	15.7219	14.725	17.4137	18.95	18.7399	17.8407	16.4744	16.2119	16.6247	17.2858	17.6036	17.9917	18.5005	17.315	16.2958	15.1546	13.5426	11.6671	13.268	13.7657	13.2387	13.905	14.392
	Theoretical minimum exergy required (GJ/ton)	7.98823	8.00138	8.0199	7.86723	7.72166	7.60976	7.55134	7.50998	7.37843	7.22156	7.16083	7.26683	7.16813	7.13207	6.86747	6.57717	6.38361	6.35554	6.01079	6.08573	5.63349	6.23839	6.11315	6.41245	6.27029	6.49342	6.53533	6.7315	6.69618	6.60842	6.68849	6.85667	6.74468	6.71413	6.75175	6.72516	6.88237	6.81928	6.96041	6.95941	6.86407	6.83637	6.90351	7.14831	6.95681	7.11725	7.18147	7.0631
	Actual Energy Consumption per unit (GJ/ton)	37.2381	35.106	35.039	32.5248	30.8196	29.5331	29.2	28.9	28.6	28.3	28	27.7189	24.9039	31.7	30.9	32.8	33.5	31.1	29.1	30.4	27.9	26.5	25	24.5	23.5	23.7	22.3	22.1	21.2	21.9	21.3	21.7	20.9	20.5	20.1	19.8	19.5	19.4	20	20.4	19.8	20	18.9	20.4	19.4	19.8	19.4	18.4
[truncated: 5 more columns]

[truncated: 2 more sheets: 7, References]
